# Supplementary material for: Post-translational Modification Crosstalk and Hotspots in Sirtuin Interactors Implicated in Cardiovascular Diseases
Source: PubMed Central journal article supplement (PMC7204943; doi:10.3389/fgene.2020.00356), 2020-04-30
Supplement: Presentation_1.pdf [file Presentation_1.pdf]

## Supplementary Material

### 1 Supplementary Figures

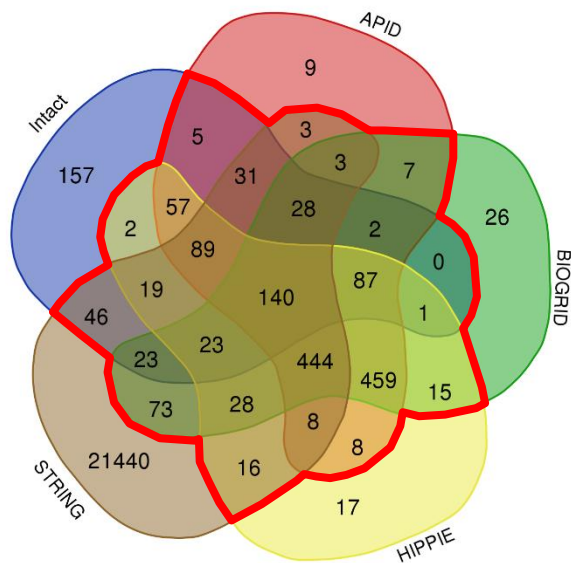

**Supplementary Figure 1:** The sirtuin interactors from five interaction databases with their overlaps (inside red outline). Proteins common to two PPI databases were selected for further analysis.

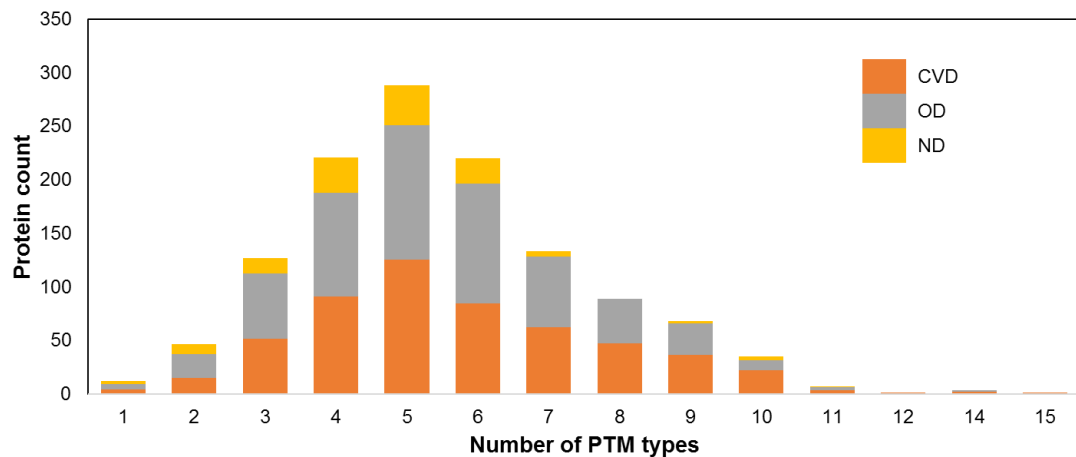

**Supplementary Figure 2:** The proteins with a particular number of PTM types and disease category are shown. Most proteins are either in CVDs or OD while ND proportion is low. CVDs are associated with approximately half of the proteins with other major proportion mapping to other diseases, being a conglomeration of several disease types.

PTM crosstalk in sirtuin interactors Supplementary Material

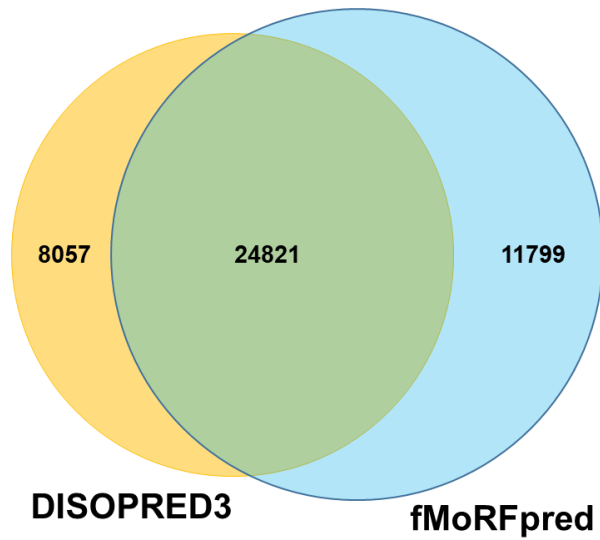

**Supplementary Figure 3:** Comparison of PTM sites in disordered regions as predicted by DISOPRED3 and fMoRFpred software. Although there was less agreement (Figure 2C) between the disordered binding and non-binding sites, the overall disorder had reasonably good agreement.

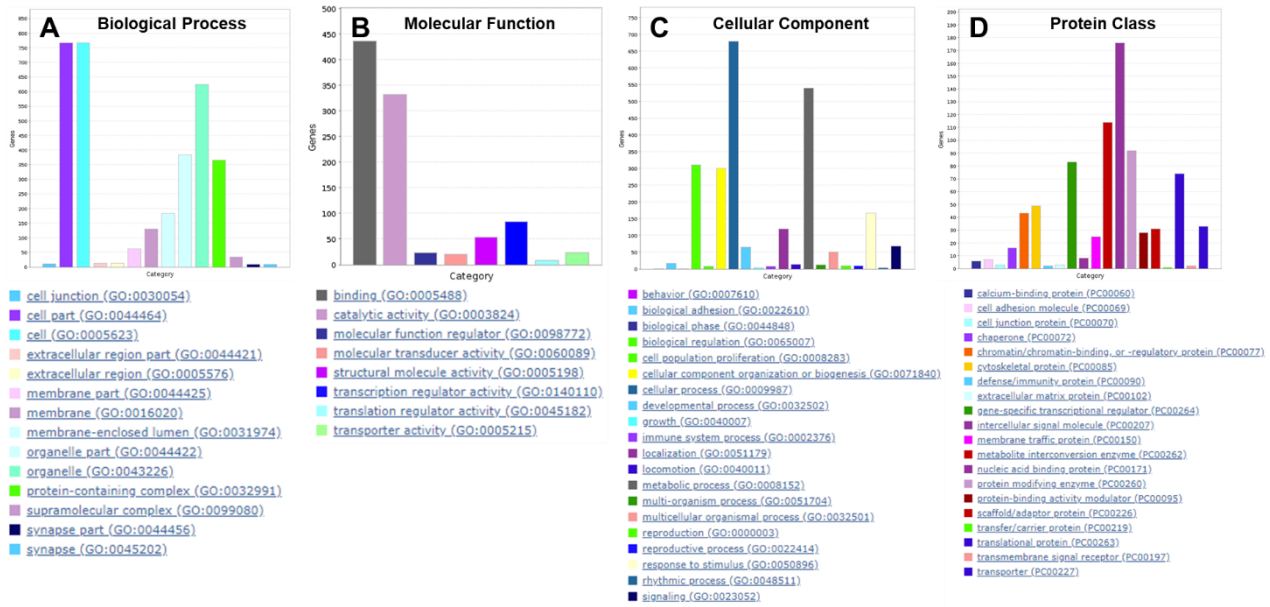

**Supplementary Figure 4:** Gene Ontology (GO) analysis for the SIRT interactors- (A) Biological Process, (B) Molecular Function, (C) Cellular Component, and (D) PANTHER Protein Class. The interactors majorly control the metabolic processes in diverse biological protein classes.

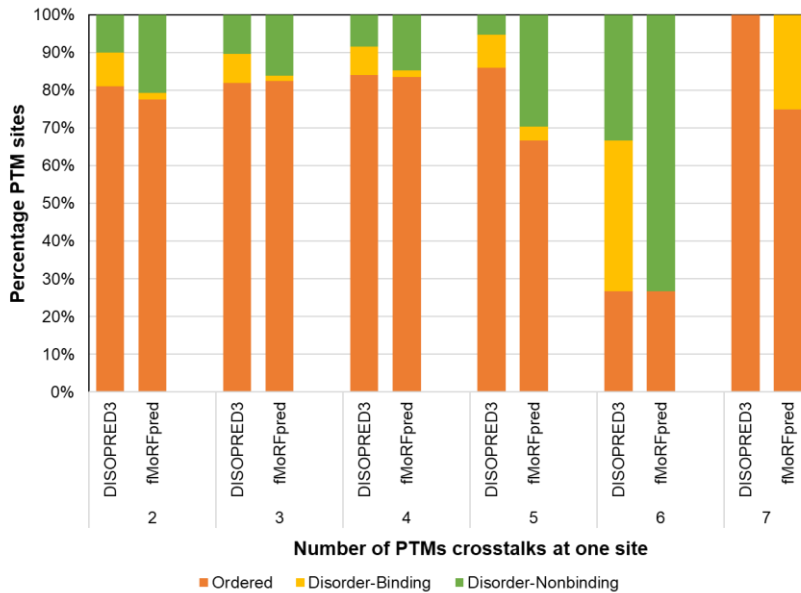

**Supplementary Figure 5:** Percentage of sites across structural regions for different frequency of PTM crosstalks at a site for DISOPRED3 and fMoRFpred prediction tools.

## PTM crosstalk in sirtuin interactors Supplementary Material

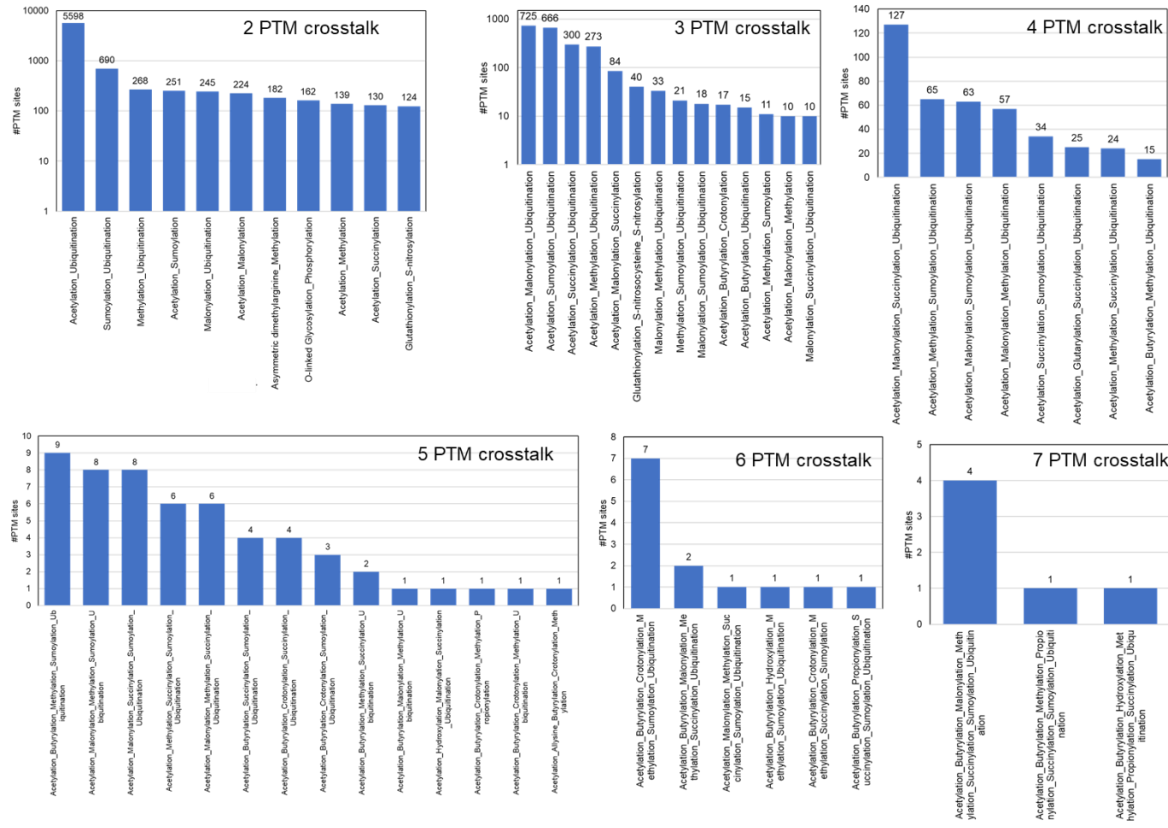

**Supplementary Figure 6:** Number of Sites observed for each type of PTM crosstalk (in-situ) in sirtuin interactors. For 2 and 3 PTM crosstalk data, PTM pairs with less than 100 sites were removed. For 4 PTM crosstalk data, pairs with less than 15 sites was removed.

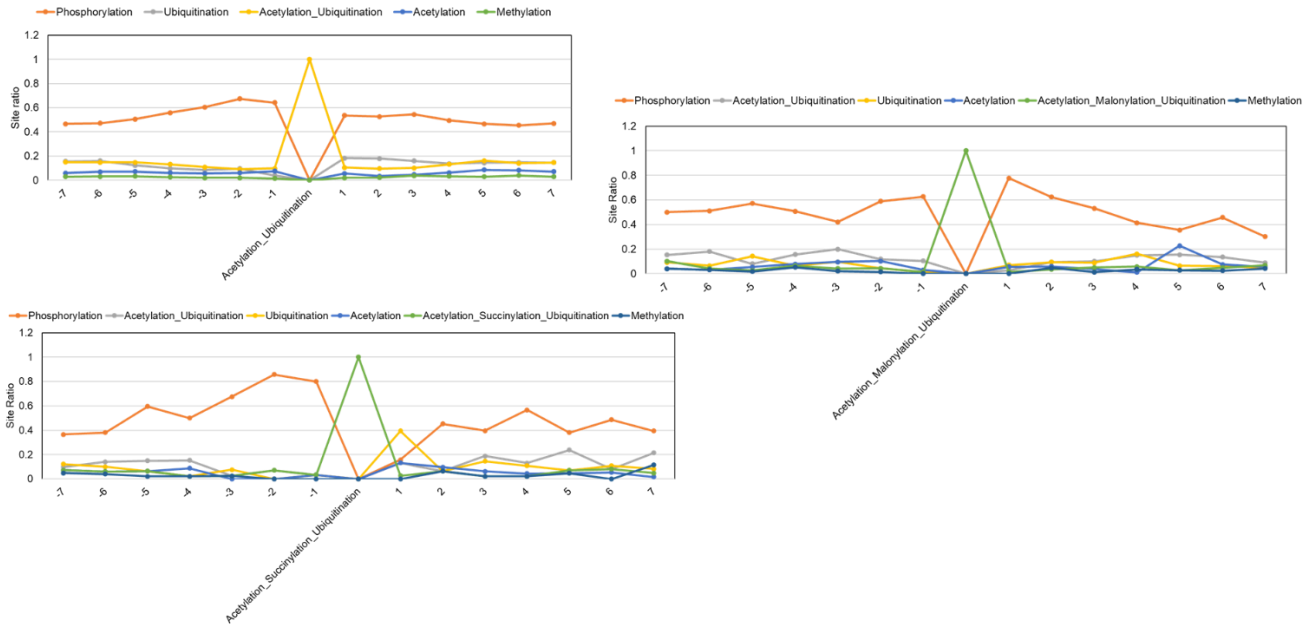

**Supplementary Figure 7:** Occurrence of PTMs in the motif of crosstalk pairs: acetylation-ubiquitination, acetylation-malonylation-ubiquitination and acetylation-succinylation-ubiquitination.

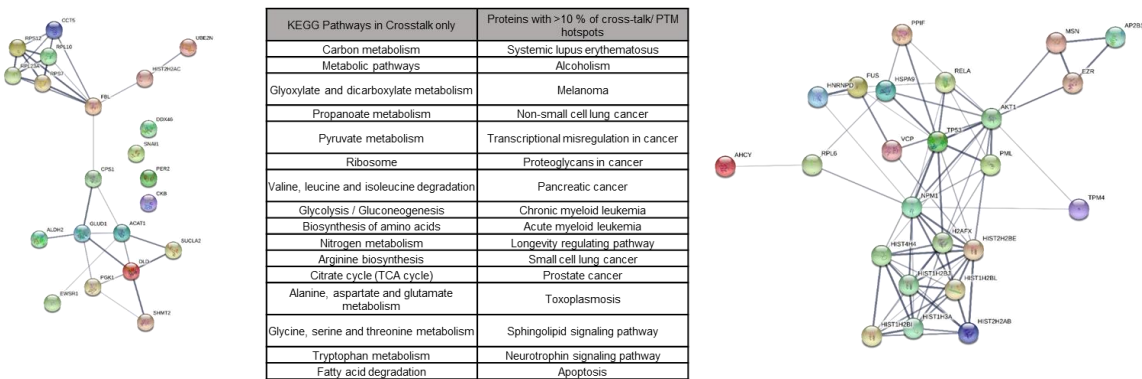

**Supplementary Figure 8:** Interaction network of proteins harboring only crosstalk hotspots (21 proteins) (left panel) and proteins containing both PTM and crosstalk hotspots (24 proteins) (right panel). The table shows the KEGG pathways enriched for both the lists respectively.

PTM crosstalk in sirtuin interactors Supplementary Material

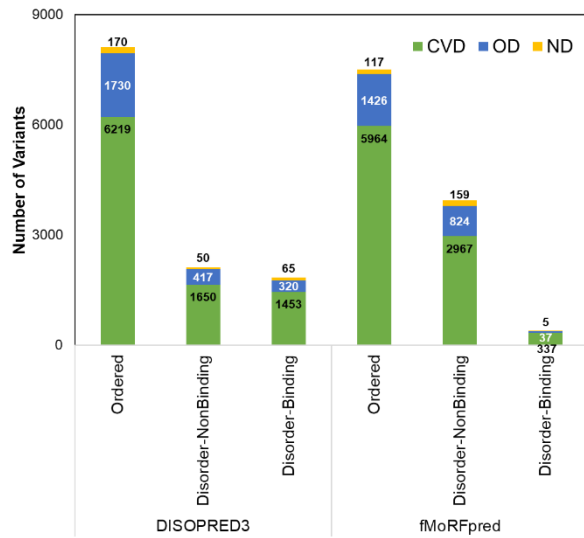

**Supplementary Figure 9:** Distribution of motif associated variants (MAVs) in the structural region of a protein as predicted by DISOPRED3 and fMoRFpred. The MAVs are further divided based on the disease association of the proteins. Most MAVs are observed in CVD associated proteins.

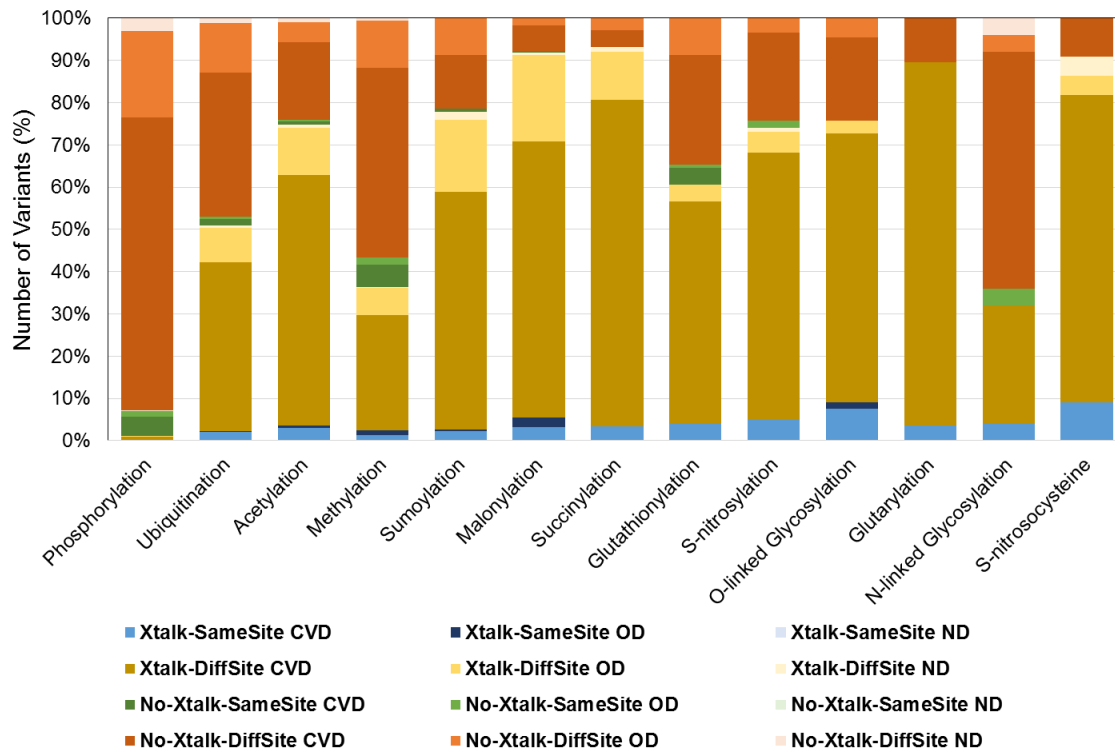

**Supplementary Figure 10:** Number of variants in site of PTM/crosstalk or in the motif with respect to its presence in diseases-associated proteins. Most of the variants were observed in motif of CVD proteins.

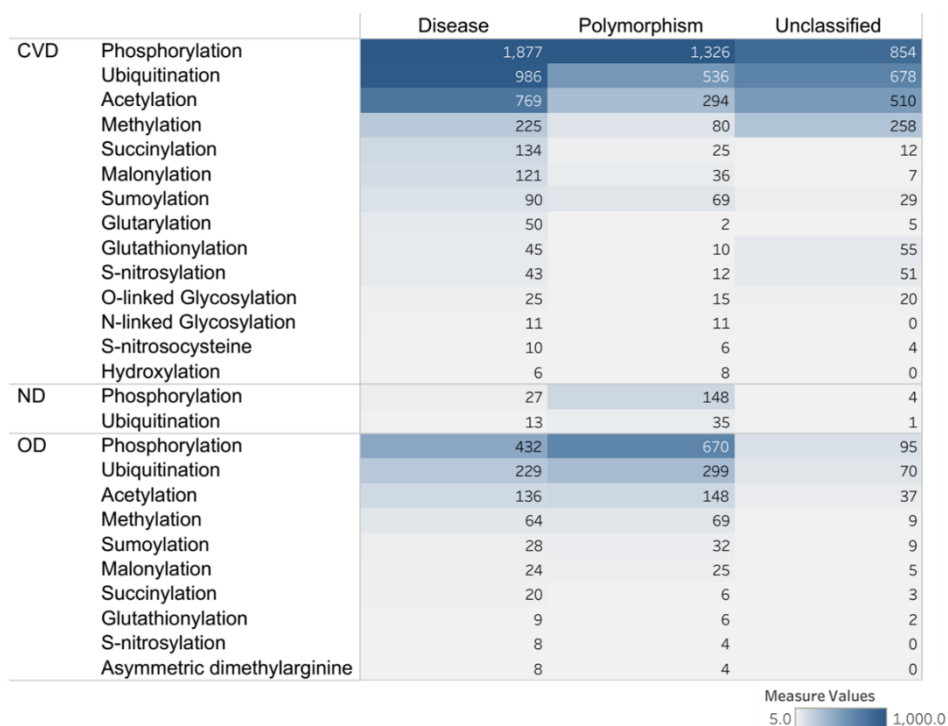

**Supplementary Figure 11:** PTM-type wise site count in different classification of variants (disease-related, polymorphic or unclassified) and disease associated proteins (CVD, OD and ND). Mostly the MAV sites were observed in CVD related proteins.

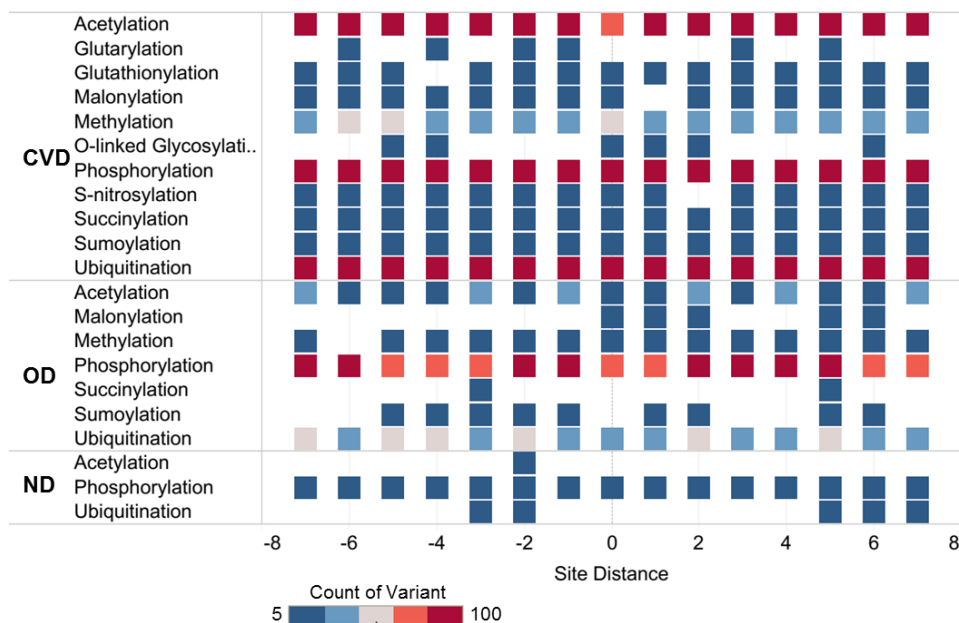

**Supplementary Figure 12:** Distribution of MAVs in specific PTM motifs.

## PTM crosstalk in sirtuin interactors Supplementary Material

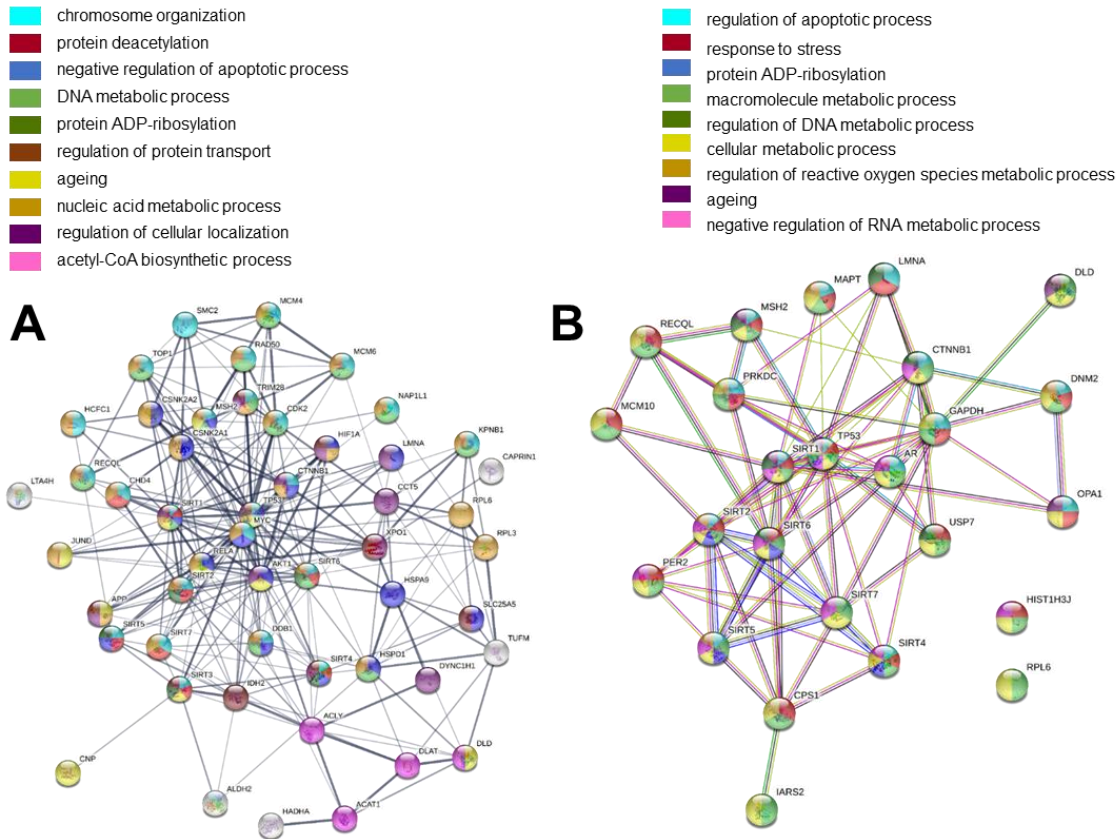

**Supplementary Figure 13:** Interaction networks and pathway enrichment of proteins containing variants in crosstalk motifs and interact with multiple SIRTs. (A) Proteins (44) containing variants in the motif of crosstalk sites. (B) Proteins (19) containing variant at the site of crosstalk leading to loss of PTM residue.
