# Supplementary material for: Post-translational Modification Crosstalk and Hotspots in Sirtuin Interactors Implicated in Cardiovascular Diseases
Source: Front Genet. 2020 Apr 30;11:356. doi: 10.3389/fgene.2020.00356 (PMC7204943; doi:10.3389/fgene.2020.00356)
Supplement: Supplementary file 4 [file Data_Sheet_1.xlsx]

## Sheet: Reactome
#term ID	term description	observed gene count	background gene count	false discovery rate	matching proteins in your network (IDs)	matching proteins in your network (labels)
HSA-8953854	Metabolism of RNA	207	652	4.37e-68	ENSP00000156471,ENSP00000168216,ENSP00000215793,ENSP00000216038,ENSP00000216277,ENSP00000216802,ENSP00000221801,ENSP00000222247,ENSP00000223073,ENSP00000225298,ENSP00000225430,ENSP00000229179,ENSP00000229214,ENSP00000230050,ENSP00000230340,ENSP00000230640,ENSP00000231498,ENSP00000232888,ENSP00000235090,ENSP00000238112,ENSP00000244230,ENSP00000245838,ENSP00000245934,ENSP00000251453,ENSP00000253247…	AKT1,ALYREF,AQR,BMS1,BOP1,BYSL,CCAR1,CHERP,CIRH1A,CNOT1,CPSF1,CPSF3,CRNKL1,CWC15,DCAF13,DDX20,DDX21,DDX23,DDX42,DDX46,DDX52,DHX15,DHX16,DHX37,DHX38,DIEXF,DIS3,EBNA1BP2,EDC4,EFTUD2,EIF4A1,EIF4G1,ELAVL1,EXOSC10,FBL,FTSJ1,FTSJ3,FUS,GEMIN4,GEMIN5,GNL3,HEATR1,HNRNPA3,HNRNPD,HNRNPF,HNRNPH1,HNRNPK,HNRNPUL1,HSD17B10,HSPA1A,HSPA8,IGF2BP2,IGF2BP3,KHSRP,KRR1,LAS1L,METTL3,MNAT1,MPHOSPH10,NAT10,NCBP1,NCL,NOC4…
HSA-6791226	Major pathway of rRNA processing in the nucleolus and cytosol	91	179	3.36e-41	ENSP00000221801,ENSP00000222247,ENSP00000223073,ENSP00000225298,ENSP00000225430,ENSP00000229214,ENSP00000230050,ENSP00000230340,ENSP00000230640,ENSP00000232888,ENSP00000244230,ENSP00000251453,ENSP00000253247,ENSP00000261015,ENSP00000261637,ENSP00000261708,ENSP00000262584,ENSP00000264279,ENSP00000291576,ENSP00000296674,ENSP00000296792,ENSP00000297579,ENSP00000297990,ENSP00000301364,ENSP00000301396…	BMS1,BOP1,BYSL,CIRH1A,DCAF13,DDX21,DDX52,DHX37,DIEXF,DIS3,EBNA1BP2,EXOSC10,FBL,FTSJ3,GNL3,HEATR1,KRR1,LAS1L,MPHOSPH10,NCL,NOC4L,NOL11,NOL6,NOL9,NOP14,NOP58,PDCD11,PELP1,PES1,PWP2,RBM28,RCL1,RIOK1,RPL10,RPL10A,RPL14,RPL15,RPL18A,RPL19,RPL21,RPL23A,RPL26,RPL3,RPL30,RPL38,RPL4,RPL5,RPL6,RPL7,RPL7A,RPL8,RPL9,RPLP0,RPLP1,RPLP2,RPS10,RPS12,RPS14,RPS15,RPS16,RPS19,RPS2,RPS23,RPS24,RPS26,RPS3A,RPS4X,RPS5…
HSA-8868773	rRNA processing in the nucleus and cytosol	93	189	3.36e-41	ENSP00000221801,ENSP00000222247,ENSP00000223073,ENSP00000225298,ENSP00000225430,ENSP00000229214,ENSP00000230050,ENSP00000230340,ENSP00000230640,ENSP00000232888,ENSP00000244230,ENSP00000251453,ENSP00000253247,ENSP00000257829,ENSP00000261015,ENSP00000261637,ENSP00000261708,ENSP00000262584,ENSP00000264279,ENSP00000291576,ENSP00000296674,ENSP00000296792,ENSP00000297579,ENSP00000297990,ENSP00000301364…	BMS1,BOP1,BYSL,CIRH1A,DCAF13,DDX21,DDX52,DHX37,DIEXF,DIS3,EBNA1BP2,EXOSC10,FBL,FTSJ3,GNL3,HEATR1,KRR1,LAS1L,MPHOSPH10,NAT10,NCL,NOC4L,NOL11,NOL6,NOL9,NOP14,NOP2,NOP58,PDCD11,PELP1,PES1,PWP2,RBM28,RCL1,RIOK1,RPL10,RPL10A,RPL14,RPL15,RPL18A,RPL19,RPL21,RPL23A,RPL26,RPL3,RPL30,RPL38,RPL4,RPL5,RPL6,RPL7,RPL7A,RPL8,RPL9,RPLP0,RPLP1,RPLP2,RPS10,RPS12,RPS14,RPS15,RPS16,RPS19,RPS2,RPS23,RPS24,RPS26,RPS3A…
HSA-72312	rRNA processing	94	199	8.28e-41	ENSP00000168216,ENSP00000221801,ENSP00000222247,ENSP00000223073,ENSP00000225298,ENSP00000225430,ENSP00000229214,ENSP00000230050,ENSP00000230340,ENSP00000230640,ENSP00000232888,ENSP00000244230,ENSP00000251453,ENSP00000253247,ENSP00000257829,ENSP00000261015,ENSP00000261637,ENSP00000261708,ENSP00000262584,ENSP00000264279,ENSP00000291576,ENSP00000296674,ENSP00000296792,ENSP00000297579,ENSP00000297990…	BMS1,BOP1,BYSL,CIRH1A,DCAF13,DDX21,DDX52,DHX37,DIEXF,DIS3,EBNA1BP2,EXOSC10,FBL,FTSJ3,GNL3,HEATR1,HSD17B10,KRR1,LAS1L,MPHOSPH10,NAT10,NCL,NOC4L,NOL11,NOL6,NOL9,NOP14,NOP2,NOP58,PDCD11,PELP1,PES1,PWP2,RBM28,RCL1,RIOK1,RPL10,RPL10A,RPL14,RPL15,RPL18A,RPL19,RPL21,RPL23A,RPL26,RPL3,RPL30,RPL38,RPL4,RPL5,RPL6,RPL7,RPL7A,RPL8,RPL9,RPLP0,RPLP1,RPLP2,RPS10,RPS12,RPS14,RPS15,RPS16,RPS19,RPS2,RPS23,RPS24,RP…
HSA-1640170	Cell Cycle	141	586	4.8e-34	ENSP00000216024,ENSP00000216122,ENSP00000216802,ENSP00000216911,ENSP00000217133,ENSP00000217244,ENSP00000218089,ENSP00000228872,ENSP00000229179,ENSP00000231498,ENSP00000234296,ENSP00000248437,ENSP00000254508,ENSP00000256442,ENSP00000258149,ENSP00000260363,ENSP00000261245,ENSP00000261396,ENSP00000261609,ENSP00000262105,ENSP00000262133,ENSP00000262506,ENSP00000262971,ENSP00000263253,ENSP00000263681…	AHCTF1,AKT1,ANAPC1,ANAPC15,ANAPC7,ATM,AURKA,BLM,BTRC,BUB1B,CCNB1,CDC20,CDC23,CDC27,CDK1,CDK2,CDK6,CDKN1B,CENPA,CENPF,CEP131,CHEK2,CKAP5,CSNK2A1,CSNK2A2,CSNK2B,DMC1,DYNC1H1,DYRK1A,E2F1,ENSG00000258947,EP300,FKBPL,FOXM1,FZR1,H2AFX,HDAC1,HERC2,HIST1H2BJ,HIST1H2BL,HIST2H2AC,HIST2H2BE,HSP90AA1,HSPA2,INCENP,KAT5,KIF23,MAX,MCM10,MCM4,MCM5,MCM6,MDC1,MDM2,MNAT1,MRE11A,MYC,NBN,NCAPD2,NIPBL,NPM1,NUMA1,NUP10…
HSA-392499	Metabolism of proteins	281	1948	3.7e-33	ENSP00000175506,ENSP00000199706,ENSP00000216129,ENSP00000216190,ENSP00000216802,ENSP00000216911,ENSP00000217133,ENSP00000217244,ENSP00000218089,ENSP00000218348,ENSP00000220849,ENSP00000222247,ENSP00000225430,ENSP00000225916,ENSP00000229179,ENSP00000229268,ENSP00000230050,ENSP00000230085,ENSP00000231498,ENSP00000231751,ENSP00000234677,ENSP00000237530,ENSP00000244571,ENSP00000247461,ENSP00000248437…	AARS,AARS2,ACADVL,ANKRD28,APP,AR,ARF3,ARRB2,ASNS,AURKA,BLM,BTRC,CALR,CANX,CAPZA1,CAPZB,CCT2,CCT3,CCT5,CCT8,CDC20,CDK1,CHD3,COPA,COPB1,COPB2,COPG1,COPG2,COPS4,COPS5,CSNK2A1,CSNK2A2,CSNK2B,CTNNB1,CUL4A,CUL4B,CUL7,CUL9,DAP3,DCAF11,DCAF13,DCAF5,DCAF7,DDB1,DIS3,DNMT1,DNMT3B,DYNC1H1,EEF1A1,EEF1G,EEF2,EIF3D,EIF3E,EIF3I,EIF3L,EIF4A1,EIF4G1,EIF5B,ENSG00000258947,EP300,EPAS1,ESR1,FBXO7,FOXL2,FOXO4,GANAB,GA…
HSA-2262752	Cellular responses to stress	111	384	2.12e-32	ENSP00000001008,ENSP00000212015,ENSP00000216802,ENSP00000217133,ENSP00000226574,ENSP00000228872,ENSP00000229179,ENSP00000231498,ENSP00000244534,ENSP00000244573,ENSP00000248437,ENSP00000250457,ENSP00000254508,ENSP00000256474,ENSP00000258149,ENSP00000261396,ENSP00000262177,ENSP00000263025,ENSP00000263168,ENSP00000263253,ENSP00000263360,ENSP00000263734,ENSP00000264071,ENSP00000264335,ENSP00000264657…	AGO1,ANAPC1,ANAPC15,ANAPC7,AR,ATM,CAPZA1,CAPZB,CCAR2,CDC23,CDC27,CDK2,CDK6,CDKN1B,DNAJA1,DNAJB6,DYNC1H1,E2F1,EED,EEF1A1,EGLN3,EHMT1,EHMT2,ENSG00000258947,EP300,EPAS1,EZH2,FKBP4,FOS,FZR1,GPX1,GSTP1,H2AFX,HDAC6,HIF1A,HIST1H1A,HIST1H1B,HIST1H1D,HIST1H1E,HIST1H2BJ,HIST1H2BL,HIST2H2AC,HIST2H2BE,HSF1,HSP90AA1,HSPA1A,HSPA1L,HSPA2,HSPA4,HSPA5,HSPA8,HSPA9,JUN,KAT5,MAP2K4,MAPK3,MAPK8,MDM2,MOV10,MRE11A,MTOR…
HSA-74160	Gene expression (Transcription)	217	1366	7.66e-30	ENSP00000212015,ENSP00000216277,ENSP00000216802,ENSP00000216911,ENSP00000217244,ENSP00000219069,ENSP00000219476,ENSP00000219548,ENSP00000225916,ENSP00000228872,ENSP00000229179,ENSP00000231498,ENSP00000232424,ENSP00000233146,ENSP00000238112,ENSP00000245838,ENSP00000245934,ENSP00000252674,ENSP00000253024,ENSP00000253727,ENSP00000254066,ENSP00000254227,ENSP00000254480,ENSP00000254508,ENSP00000254605…	AGO1,AKT1,ALYREF,AR,ARID1A,ARID4B,ATAD2,ATM,AURKA,BAZ1B,BAZ2A,BCL6,BLM,CBX3,CCNB1,CDK1,CDK2,CDK6,CDK9,CDKN1B,CHD3,CHD4,CHEK2,CNOT1,CPSF1,CPSF3,CREB1,CSNK2A1,CSNK2A2,CSNK2B,CTNNB1,DDX21,DHX38,DICER1,DNMT1,DNMT3B,E2F1,EED,EHMT1,EHMT2,ELL,ELL3,EP300,ESR1,ESR2,ESRRA,ESRRB,EZH2,FANCI,FOS,FOXO3,FOXP3,G6PD,GATAD2B,GLS,GPAM,GTF2A1,GTF3C1,GTF3C3,H2AFX,HDAC1,HDAC2,HDAC3,HDAC4,HDAC6,HES1,HEY2,HIPK2,HIST1H2B…
HSA-8953897	Cellular responses to external stimuli	116	459	1.68e-29	ENSP00000001008,ENSP00000212015,ENSP00000216802,ENSP00000217133,ENSP00000219476,ENSP00000226574,ENSP00000228872,ENSP00000229179,ENSP00000231498,ENSP00000244534,ENSP00000244573,ENSP00000248437,ENSP00000250457,ENSP00000254508,ENSP00000256474,ENSP00000258149,ENSP00000261396,ENSP00000262177,ENSP00000263025,ENSP00000263168,ENSP00000263253,ENSP00000263360,ENSP00000263734,ENSP00000264071,ENSP00000264335…	AGO1,ANAPC1,ANAPC15,ANAPC7,AR,ATG5,ATG7,ATM,CAPZA1,CAPZB,CCAR2,CDC23,CDC27,CDK2,CDK6,CDKN1B,DNAJA1,DNAJB6,DYNC1H1,E2F1,EED,EEF1A1,EGLN3,EHMT1,EHMT2,ENSG00000258947,EP300,EPAS1,EZH2,FKBP4,FOS,FZR1,GABARAPL1,GPX1,GSTP1,H2AFX,HDAC6,HIF1A,HIST1H1A,HIST1H1B,HIST1H1D,HIST1H1E,HIST1H2BJ,HIST1H2BL,HIST2H2AC,HIST2H2BE,HSF1,HSP90AA1,HSPA1A,HSPA1L,HSPA2,HSPA4,HSPA5,HSPA8,HSPA9,JUN,KAT5,MAP1LC3B,MAP2K4,MAPK3…
HSA-69278	Cell Cycle, Mitotic	114	483	8.95e-27	ENSP00000216122,ENSP00000216802,ENSP00000216911,ENSP00000217133,ENSP00000217244,ENSP00000218089,ENSP00000228872,ENSP00000229179,ENSP00000231498,ENSP00000234296,ENSP00000248437,ENSP00000254508,ENSP00000256442,ENSP00000260363,ENSP00000261245,ENSP00000261396,ENSP00000262105,ENSP00000262133,ENSP00000262506,ENSP00000263253,ENSP00000263681,ENSP00000264071,ENSP00000264156,ENSP00000264335,ENSP00000265295…	AHCTF1,AKT1,ANAPC1,ANAPC15,ANAPC7,AURKA,BTRC,BUB1B,CCNB1,CDC20,CDC23,CDC27,CDK1,CDK2,CDK6,CDKN1B,CENPA,CENPF,CEP131,CKAP5,CSNK2A1,CSNK2A2,CSNK2B,DYNC1H1,DYRK1A,E2F1,ENSG00000258947,EP300,FKBPL,FOXM1,FZR1,H2AFX,HDAC1,HIST1H2BJ,HIST1H2BL,HIST2H2AC,HIST2H2BE,HSP90AA1,INCENP,KIF23,MAX,MCM10,MCM4,MCM5,MCM6,MNAT1,MYC,NCAPD2,NIPBL,NUMA1,NUP107,NUP133,NUP153,NUP155,NUP160,NUP188,NUP205,NUP210,NUP214,NUP8…
HSA-3108232	SUMO E3 ligases SUMOylate target proteins	65	154	5.89e-26	ENSP00000216911,ENSP00000218089,ENSP00000229179,ENSP00000231498,ENSP00000249636,ENSP00000253024,ENSP00000253727,ENSP00000254066,ENSP00000254508,ENSP00000256474,ENSP00000258149,ENSP00000261396,ENSP00000261609,ENSP00000262971,ENSP00000263253,ENSP00000264279,ENSP00000264606,ENSP00000264867,ENSP00000268058,ENSP00000269305,ENSP00000283195,ENSP00000285021,ENSP00000285968,ENSP00000287820,ENSP00000296930…	AR,AURKA,BLM,CHD3,DNMT1,DNMT3B,EP300,ESR1,FOXL2,HDAC1,HDAC2,HDAC4,HERC2,HIC1,HIPK2,HNRNPK,INCENP,ING2,MDC1,MDM2,MTA1,NOP58,NPM1,NR1H2,NSMCE4A,NUP107,NUP133,NUP153,NUP155,NUP160,NUP188,NUP205,NUP210,NUP214,NUP88,NUP93,PARP1,PIAS1,PIAS3,PIAS4,PML,PPARA,PPARG,PPARGC1A,RAD21,RANBP2,RANGAP1,RARA,RELA,SATB1,SMC1A,SMC3,STAG2,SUZ12,TDG,TOP1,TP53,TP53BP1,TPR,TRIM28,UBE2I,VDR,VHL,WRN,XPC
HSA-2990846	SUMOylation	66	160	5.96e-26	ENSP00000216911,ENSP00000218089,ENSP00000229179,ENSP00000231498,ENSP00000249636,ENSP00000253024,ENSP00000253727,ENSP00000254066,ENSP00000254508,ENSP00000256474,ENSP00000258149,ENSP00000261396,ENSP00000261609,ENSP00000262971,ENSP00000263253,ENSP00000264279,ENSP00000264606,ENSP00000264867,ENSP00000268058,ENSP00000269305,ENSP00000283195,ENSP00000285021,ENSP00000285968,ENSP00000287820,ENSP00000296930…	AR,AURKA,BLM,CHD3,DNMT1,DNMT3B,EP300,ESR1,FOXL2,HDAC1,HDAC2,HDAC4,HERC2,HIC1,HIPK2,HNRNPK,INCENP,ING2,MDC1,MDM2,MTA1,NOP58,NPM1,NR1H2,NSMCE4A,NUP107,NUP133,NUP153,NUP155,NUP160,NUP188,NUP205,NUP210,NUP214,NUP88,NUP93,PARP1,PIAS1,PIAS3,PIAS4,PML,PPARA,PPARG,PPARGC1A,RAD21,RANBP2,RANGAP1,RARA,RELA,SATB1,SENP1,SMC1A,SMC3,STAG2,SUZ12,TDG,TOP1,TP53,TP53BP1,TPR,TRIM28,UBE2I,VDR,VHL,WRN,XPC
HSA-168254	Influenza Infection	63	148	2.31e-25	ENSP00000222247,ENSP00000225430,ENSP00000229179,ENSP00000230050,ENSP00000231498,ENSP00000247461,ENSP00000251453,ENSP00000254508,ENSP00000261396,ENSP00000261574,ENSP00000261667,ENSP00000262584,ENSP00000283195,ENSP00000285968,ENSP00000290158,ENSP00000296674,ENSP00000309334,ENSP00000309830,ENSP00000310668,ENSP00000311430,ENSP00000320866,ENSP00000322419,ENSP00000335153,ENSP00000339095,ENSP00000339795…	CALR,CANX,CLTC,HSP90AA1,HSPA1A,IPO5,KPNA2,KPNA3,KPNB1,NUP107,NUP133,NUP153,NUP155,NUP160,NUP188,NUP205,NUP210,NUP214,NUP88,NUP93,POLR2A,RANBP2,RPL10,RPL10A,RPL14,RPL15,RPL18A,RPL19,RPL21,RPL23A,RPL26,RPL3,RPL30,RPL38,RPL4,RPL5,RPL6,RPL7,RPL7A,RPL8,RPL9,RPLP0,RPLP1,RPLP2,RPS10,RPS12,RPS14,RPS15,RPS16,RPS19,RPS2,RPS23,RPS24,RPS26,RPS3A,RPS4X,RPS5,RPS6,RPS7,RPSA,SLC25A6,TPR,XPO1
HSA-168255	Influenza Life Cycle	60	137	1.16e-24	ENSP00000222247,ENSP00000225430,ENSP00000229179,ENSP00000230050,ENSP00000231498,ENSP00000247461,ENSP00000251453,ENSP00000254508,ENSP00000261396,ENSP00000261574,ENSP00000262584,ENSP00000283195,ENSP00000285968,ENSP00000290158,ENSP00000296674,ENSP00000309334,ENSP00000309830,ENSP00000310668,ENSP00000311430,ENSP00000320866,ENSP00000322419,ENSP00000335153,ENSP00000339095,ENSP00000339795,ENSP00000341885…	CALR,CANX,CLTC,HSP90AA1,HSPA1A,IPO5,KPNB1,NUP107,NUP133,NUP153,NUP155,NUP160,NUP188,NUP205,NUP210,NUP214,NUP88,NUP93,POLR2A,RANBP2,RPL10,RPL10A,RPL14,RPL15,RPL18A,RPL19,RPL21,RPL23A,RPL26,RPL3,RPL30,RPL38,RPL4,RPL5,RPL6,RPL7,RPL7A,RPL8,RPL9,RPLP0,RPLP1,RPLP2,RPS10,RPS12,RPS14,RPS15,RPS16,RPS19,RPS2,RPS23,RPS24,RPS26,RPS3A,RPS4X,RPS5,RPS6,RPS7,RPSA,TPR,XPO1
HSA-5663205	Infectious disease	94	363	1.69e-24	ENSP00000216802,ENSP00000222247,ENSP00000225430,ENSP00000229179,ENSP00000230050,ENSP00000231498,ENSP00000231751,ENSP00000247461,ENSP00000251453,ENSP00000254508,ENSP00000261245,ENSP00000261396,ENSP00000261574,ENSP00000261667,ENSP00000262584,ENSP00000262809,ENSP00000264033,ENSP00000283195,ENSP00000285968,ENSP00000290158,ENSP00000293362,ENSP00000296674,ENSP00000296930,ENSP00000307940,ENSP00000309334…	AP1B1,AP2B1,BTRC,CALR,CANX,CBL,CDK9,CLTC,CTNNB1,EEF2,ELL,GTF2A1,HSP90AA1,HSPA1A,IPO5,KPNA2,KPNA3,KPNB1,LTF,MAP2K4,MNAT1,NCBP1,NPM1,NUP107,NUP133,NUP153,NUP155,NUP160,NUP188,NUP205,NUP210,NUP214,NUP88,NUP93,PDCD6IP,POLR2A,PSMC2,PSMC3,PSMC5,PSMC6,PSMD1,PSMD12,PSMD2,PSME2,PSME3,RANBP2,RANGAP1,RPL10,RPL10A,RPL14,RPL15,RPL18A,RPL19,RPL21,RPL23A,RPL26,RPL3,RPL30,RPL38,RPL4,RPL5,RPL6,RPL7,RPL7A,RPL8,RPL…
HSA-1643685	Disease	165	1018	4.15e-23	ENSP00000211998,ENSP00000216802,ENSP00000217426,ENSP00000219476,ENSP00000222247,ENSP00000225430,ENSP00000225916,ENSP00000226574,ENSP00000228872,ENSP00000229179,ENSP00000230050,ENSP00000231498,ENSP00000231751,ENSP00000232219,ENSP00000232424,ENSP00000233146,ENSP00000234420,ENSP00000242351,ENSP00000247461,ENSP00000251453,ENSP00000254508,ENSP00000258149,ENSP00000261245,ENSP00000261396,ENSP00000261531…	ACACA,AHCY,AKT1,AP1B1,AP2B1,APP,ARRB2,ATG7,BTRC,CALR,CANX,CAPN1,CBL,CDK9,CDKN1B,CLTC,CREB1,CTNNB1,EEF2,ELL,EP300,ESR1,ESR2,FGF10,FKBP1A,FOXO1,FOXO3,FOXO4,FXR1,GCKR,GFPT1,GTF2A1,GYG2,GYS1,HDAC1,HDAC2,HDAC3,HDAC4,HDAC6,HES1,HES5,HEY2,HK1,HSP90AA1,HSPA1A,IPO5,IQGAP1,IRS1,IRS2,JUN,KAT2A,KAT2B,KPNA2,KPNA3,KPNB1,KSR2,LMNA,LTF,MAP2K4,MAPK3,MCCC1,MCCC2,MDM2,MMAA,MNAT1,MSH2,MSH6,MTOR,MYC,NCBP1,NCOR1,NF1,N…
HSA-168273	Influenza Viral RNA Transcription and Replication	54	128	1.29e-21	ENSP00000222247,ENSP00000225430,ENSP00000229179,ENSP00000230050,ENSP00000231498,ENSP00000251453,ENSP00000254508,ENSP00000261396,ENSP00000261574,ENSP00000262584,ENSP00000283195,ENSP00000285968,ENSP00000296674,ENSP00000309334,ENSP00000309830,ENSP00000310668,ENSP00000311430,ENSP00000322419,ENSP00000335153,ENSP00000339095,ENSP00000339795,ENSP00000341885,ENSP00000346001,ENSP00000346027,ENSP00000346037…	HSP90AA1,IPO5,NUP107,NUP133,NUP153,NUP155,NUP160,NUP188,NUP205,NUP210,NUP214,NUP88,NUP93,POLR2A,RANBP2,RPL10,RPL10A,RPL14,RPL15,RPL18A,RPL19,RPL21,RPL23A,RPL26,RPL3,RPL30,RPL38,RPL4,RPL5,RPL6,RPL7,RPL7A,RPL8,RPL9,RPLP0,RPLP1,RPLP2,RPS10,RPS12,RPS14,RPS15,RPS16,RPS19,RPS2,RPS23,RPS24,RPS26,RPS3A,RPS4X,RPS5,RPS6,RPS7,RPSA,TPR
HSA-72203	Processing of Capped Intron-Containing Pre-mRNA	71	234	1.29e-21	ENSP00000156471,ENSP00000215793,ENSP00000216277,ENSP00000229179,ENSP00000230640,ENSP00000231498,ENSP00000238112,ENSP00000245838,ENSP00000245934,ENSP00000254108,ENSP00000254508,ENSP00000261396,ENSP00000261531,ENSP00000265872,ENSP00000266079,ENSP00000268482,ENSP00000283195,ENSP00000285968,ENSP00000298717,ENSP00000300291,ENSP00000301740,ENSP00000307863,ENSP00000310448,ENSP00000310668,ENSP00000310723…	ALYREF,AQR,CCAR1,CHERP,CPSF1,CPSF3,CRNKL1,CWC15,DDX23,DDX42,DDX46,DHX15,DHX16,DHX38,EFTUD2,ELAVL1,FUS,HNRNPA3,HNRNPD,HNRNPF,HNRNPH1,HNRNPK,HNRNPUL1,HSPA8,METTL3,NCBP1,NUDT21,NUP107,NUP133,NUP153,NUP155,NUP160,NUP188,NUP205,NUP210,NUP214,NUP88,NUP93,NXF1,PAPOLA,POLDIP3,POLR2A,PRPF40A,PRPF6,PRPF8,PUF60,RANBP2,RBMX,SART1,SF3A1,SF3B1,SF3B2,SKIV2L2,SNRNP200,SNRNP70,SNW1,SRRM1,SRRM2,SRSF2,SRSF3,SRSF4,S…
HSA-72766	Translation	78	288	2.81e-21	ENSP00000199706,ENSP00000216190,ENSP00000220849,ENSP00000222247,ENSP00000225430,ENSP00000230050,ENSP00000234677,ENSP00000237530,ENSP00000244571,ENSP00000251453,ENSP00000254630,ENSP00000256854,ENSP00000258383,ENSP00000258455,ENSP00000259873,ENSP00000261772,ENSP00000262584,ENSP00000289371,ENSP00000293831,ENSP00000296674,ENSP00000305682,ENSP00000307940,ENSP00000308275,ENSP00000309334,ENSP00000309830…	AARS,AARS2,DAP3,EEF1A1,EEF1G,EEF2,EIF3D,EIF3E,EIF3I,EIF3L,EIF4A1,EIF4G1,EIF5B,GARS,IARS2,KARS,MRPL1,MRPL28,MRPL37,MRPL38,MRPL39,MRPL42,MRPL44,MRPS18B,MRPS22,MRPS23,MRPS30,MRPS9,NARS,PABPC1,PPA2,PTCD3,RARS2,RPL10,RPL10A,RPL14,RPL15,RPL18A,RPL19,RPL21,RPL23A,RPL26,RPL3,RPL30,RPL38,RPL4,RPL5,RPL6,RPL7,RPL7A,RPL8,RPL9,RPLP0,RPLP1,RPLP2,RPN2,RPS10,RPS12,RPS14,RPS15,RPS16,RPS19,RPS2,RPS23,RPS24,RPS26,R…
HSA-73857	RNA Polymerase II Transcription	179	1233	1.58e-20	ENSP00000216277,ENSP00000216802,ENSP00000216911,ENSP00000217244,ENSP00000219069,ENSP00000219476,ENSP00000219548,ENSP00000225916,ENSP00000228872,ENSP00000232424,ENSP00000233146,ENSP00000238112,ENSP00000245838,ENSP00000245934,ENSP00000252674,ENSP00000253024,ENSP00000253727,ENSP00000254066,ENSP00000254227,ENSP00000254480,ENSP00000256442,ENSP00000258149,ENSP00000260665,ENSP00000261245,ENSP00000261531…	AGO1,AKT1,ALYREF,AR,ARID1A,ATAD2,ATM,AURKA,BCL6,BLM,CBX3,CCNB1,CDK1,CDK2,CDK6,CDK9,CDKN1B,CHD3,CHD4,CHEK2,CNOT1,CPSF1,CPSF3,CREB1,CSNK2A1,CSNK2A2,CSNK2B,CTNNB1,DHX38,E2F1,EED,EHMT1,EHMT2,ELL,ELL3,EP300,ESR1,ESR2,ESRRA,ESRRB,EZH2,FANCI,FOS,FOXO3,FOXP3,G6PD,GATAD2B,GLS,GPAM,GTF2A1,H2AFX,HDAC1,HDAC2,HDAC3,HDAC4,HDAC6,HES1,HEY2,HIPK2,HIST1H2BJ,HIST1H2BL,HIST2H2AC,HIST2H2BE,HNF4A,HSPD1,ING2,INTS1,JUN,…
HSA-68886	M Phase	82	343	1.63e-19	ENSP00000216802,ENSP00000217133,ENSP00000217244,ENSP00000218089,ENSP00000229179,ENSP00000231498,ENSP00000248437,ENSP00000254508,ENSP00000256442,ENSP00000260363,ENSP00000261396,ENSP00000262506,ENSP00000264071,ENSP00000264335,ENSP00000265295,ENSP00000267163,ENSP00000282516,ENSP00000283195,ENSP00000285968,ENSP00000286398,ENSP00000287598,ENSP00000293362,ENSP00000297338,ENSP00000298767,ENSP00000301071…	AHCTF1,ANAPC1,ANAPC15,ANAPC7,BUB1B,CCNB1,CDC20,CDC23,CDC27,CDK1,CENPA,CENPF,CEP131,CKAP5,CSNK2A1,CSNK2A2,CSNK2B,DYNC1H1,ENSG00000258947,H2AFX,HIST1H2BJ,HIST1H2BL,HIST2H2AC,HIST2H2BE,HSP90AA1,INCENP,KIF23,NCAPD2,NIPBL,NUMA1,NUP107,NUP133,NUP153,NUP155,NUP160,NUP188,NUP205,NUP210,NUP214,NUP88,NUP93,ODF2,PCM1,PCNT,PDS5A,PDS5B,PPP1CC,PPP2R1A,PSMC2,PSMC3,PSMC5,PSMC6,PSMD1,PSMD12,PSMD2,PSME2,PSME3,RAD2…
HSA-6790901	rRNA modification in the nucleus and cytosol	37	60	6.29e-19	ENSP00000221801,ENSP00000225298,ENSP00000229214,ENSP00000232888,ENSP00000244230,ENSP00000253247,ENSP00000257829,ENSP00000261637,ENSP00000261708,ENSP00000264279,ENSP00000291576,ENSP00000296792,ENSP00000297579,ENSP00000297990,ENSP00000308179,ENSP00000311135,ENSP00000314193,ENSP00000321449,ENSP00000327179,ENSP00000328854,ENSP00000339095,ENSP00000341885,ENSP00000355541,ENSP00000358812,ENSP00000363642…	BMS1,CIRH1A,DCAF13,DDX52,DHX37,DIEXF,FBL,HEATR1,KRR1,MPHOSPH10,NAT10,NOC4L,NOL11,NOL6,NOP14,NOP2,NOP58,PDCD11,PWP2,RCL1,RPS14,RPS2,RPS6,RPS7,RRP7A,RRP9,TBL3,UTP14A,UTP15,UTP18,UTP20,UTP6,WDR3,WDR36,WDR43,WDR46,WDR75
HSA-156827	L13a-mediated translational silencing of Ceruloplasmin expression	45	107	5.47e-18	ENSP00000216190,ENSP00000220849,ENSP00000222247,ENSP00000225430,ENSP00000230050,ENSP00000251453,ENSP00000262584,ENSP00000293831,ENSP00000296674,ENSP00000309334,ENSP00000309830,ENSP00000311430,ENSP00000313007,ENSP00000322419,ENSP00000339095,ENSP00000339795,ENSP00000341885,ENSP00000346001,ENSP00000346027,ENSP00000346037,ENSP00000346050,ENSP00000346067,ENSP00000348849,ENSP00000359345,ENSP00000361076…	EIF3D,EIF3E,EIF3I,EIF3L,EIF4A1,EIF4G1,PABPC1,RPL10,RPL10A,RPL14,RPL15,RPL18A,RPL19,RPL21,RPL23A,RPL26,RPL3,RPL30,RPL38,RPL4,RPL5,RPL6,RPL7,RPL7A,RPL8,RPL9,RPLP0,RPLP1,RPLP2,RPS10,RPS12,RPS14,RPS15,RPS16,RPS19,RPS2,RPS23,RPS24,RPS26,RPS3A,RPS4X,RPS5,RPS6,RPS7,RPSA
HSA-72706	GTP hydrolysis and joining of the 60S ribosomal subunit	45	108	7e-18	ENSP00000216190,ENSP00000220849,ENSP00000222247,ENSP00000225430,ENSP00000230050,ENSP00000251453,ENSP00000262584,ENSP00000289371,ENSP00000293831,ENSP00000296674,ENSP00000309334,ENSP00000309830,ENSP00000311430,ENSP00000322419,ENSP00000339095,ENSP00000339795,ENSP00000341885,ENSP00000346001,ENSP00000346027,ENSP00000346037,ENSP00000346050,ENSP00000346067,ENSP00000348849,ENSP00000359345,ENSP00000361076…	EIF3D,EIF3E,EIF3I,EIF3L,EIF4A1,EIF4G1,EIF5B,RPL10,RPL10A,RPL14,RPL15,RPL18A,RPL19,RPL21,RPL23A,RPL26,RPL3,RPL30,RPL38,RPL4,RPL5,RPL6,RPL7,RPL7A,RPL8,RPL9,RPLP0,RPLP1,RPLP2,RPS10,RPS12,RPS14,RPS15,RPS16,RPS19,RPS2,RPS23,RPS24,RPS26,RPS3A,RPS4X,RPS5,RPS6,RPS7,RPSA
HSA-975956	Nonsense Mediated Decay (NMD) independent of the Exon Junction Complex (EJC)	42	92	7.82e-18	ENSP00000222247,ENSP00000225430,ENSP00000230050,ENSP00000251453,ENSP00000262584,ENSP00000296674,ENSP00000309334,ENSP00000309830,ENSP00000311430,ENSP00000313007,ENSP00000322419,ENSP00000339095,ENSP00000339795,ENSP00000341885,ENSP00000346001,ENSP00000346027,ENSP00000346037,ENSP00000346050,ENSP00000346067,ENSP00000348849,ENSP00000359345,ENSP00000361076,ENSP00000362744,ENSP00000363018,ENSP00000364289…	EIF4G1,NCBP1,PABPC1,RPL10,RPL10A,RPL14,RPL15,RPL18A,RPL19,RPL21,RPL23A,RPL26,RPL3,RPL30,RPL38,RPL4,RPL5,RPL6,RPL7,RPL7A,RPL8,RPL9,RPLP0,RPLP1,RPLP2,RPS10,RPS12,RPS14,RPS15,RPS16,RPS19,RPS2,RPS23,RPS24,RPS26,RPS3A,RPS4X,RPS5,RPS6,RPS7,RPSA,UPF1
HSA-72737	Cap-dependent Translation Initiation	46	115	9.29e-18	ENSP00000216190,ENSP00000220849,ENSP00000222247,ENSP00000225430,ENSP00000230050,ENSP00000251453,ENSP00000262584,ENSP00000289371,ENSP00000293831,ENSP00000296674,ENSP00000309334,ENSP00000309830,ENSP00000311430,ENSP00000313007,ENSP00000322419,ENSP00000339095,ENSP00000339795,ENSP00000341885,ENSP00000346001,ENSP00000346027,ENSP00000346037,ENSP00000346050,ENSP00000346067,ENSP00000348849,ENSP00000359345…	EIF3D,EIF3E,EIF3I,EIF3L,EIF4A1,EIF4G1,EIF5B,PABPC1,RPL10,RPL10A,RPL14,RPL15,RPL18A,RPL19,RPL21,RPL23A,RPL26,RPL3,RPL30,RPL38,RPL4,RPL5,RPL6,RPL7,RPL7A,RPL8,RPL9,RPLP0,RPLP1,RPLP2,RPS10,RPS12,RPS14,RPS15,RPS16,RPS19,RPS2,RPS23,RPS24,RPS26,RPS3A,RPS4X,RPS5,RPS6,RPS7,RPSA
HSA-156842	Eukaryotic Translation Elongation	41	90	2.01e-17	ENSP00000222247,ENSP00000225430,ENSP00000230050,ENSP00000251453,ENSP00000262584,ENSP00000296674,ENSP00000307940,ENSP00000309334,ENSP00000309830,ENSP00000311430,ENSP00000322419,ENSP00000331901,ENSP00000339063,ENSP00000339095,ENSP00000339795,ENSP00000341885,ENSP00000346001,ENSP00000346027,ENSP00000346037,ENSP00000346050,ENSP00000346067,ENSP00000348849,ENSP00000359345,ENSP00000361076,ENSP00000362744…	EEF1A1,EEF1G,EEF2,RPL10,RPL10A,RPL14,RPL15,RPL18A,RPL19,RPL21,RPL23A,RPL26,RPL3,RPL30,RPL38,RPL4,RPL5,RPL6,RPL7,RPL7A,RPL8,RPL9,RPLP0,RPLP1,RPLP2,RPS10,RPS12,RPS14,RPS15,RPS16,RPS19,RPS2,RPS23,RPS24,RPS26,RPS3A,RPS4X,RPS5,RPS6,RPS7,RPSA
HSA-156902	Peptide chain elongation	40	86	2.96e-17	ENSP00000222247,ENSP00000225430,ENSP00000230050,ENSP00000251453,ENSP00000262584,ENSP00000296674,ENSP00000307940,ENSP00000309334,ENSP00000309830,ENSP00000311430,ENSP00000322419,ENSP00000339063,ENSP00000339095,ENSP00000339795,ENSP00000341885,ENSP00000346001,ENSP00000346027,ENSP00000346037,ENSP00000346050,ENSP00000346067,ENSP00000348849,ENSP00000359345,ENSP00000361076,ENSP00000362744,ENSP00000363018…	EEF1A1,EEF2,RPL10,RPL10A,RPL14,RPL15,RPL18A,RPL19,RPL21,RPL23A,RPL26,RPL3,RPL30,RPL38,RPL4,RPL5,RPL6,RPL7,RPL7A,RPL8,RPL9,RPLP0,RPLP1,RPLP2,RPS10,RPS12,RPS14,RPS15,RPS16,RPS19,RPS2,RPS23,RPS24,RPS26,RPS3A,RPS4X,RPS5,RPS6,RPS7,RPSA
HSA-72689	Formation of a pool of free 40S subunits	42	98	4.09e-17	ENSP00000216190,ENSP00000220849,ENSP00000222247,ENSP00000225430,ENSP00000230050,ENSP00000251453,ENSP00000262584,ENSP00000296674,ENSP00000309334,ENSP00000309830,ENSP00000311430,ENSP00000322419,ENSP00000339095,ENSP00000339795,ENSP00000341885,ENSP00000346001,ENSP00000346027,ENSP00000346037,ENSP00000346050,ENSP00000346067,ENSP00000348849,ENSP00000359345,ENSP00000361076,ENSP00000362688,ENSP00000362744…	EIF3D,EIF3E,EIF3I,EIF3L,RPL10,RPL10A,RPL14,RPL15,RPL18A,RPL19,RPL21,RPL23A,RPL26,RPL3,RPL30,RPL38,RPL4,RPL5,RPL6,RPL7,RPL7A,RPL8,RPL9,RPLP0,RPLP1,RPLP2,RPS10,RPS12,RPS14,RPS15,RPS16,RPS19,RPS2,RPS23,RPS24,RPS26,RPS3A,RPS4X,RPS5,RPS6,RPS7,RPSA
HSA-212436	Generic Transcription Pathway	155	1112	2.89e-16	ENSP00000216802,ENSP00000216911,ENSP00000217244,ENSP00000219069,ENSP00000219476,ENSP00000219548,ENSP00000225916,ENSP00000228872,ENSP00000232424,ENSP00000233146,ENSP00000253024,ENSP00000253727,ENSP00000254066,ENSP00000254227,ENSP00000254480,ENSP00000256442,ENSP00000258149,ENSP00000260665,ENSP00000261245,ENSP00000261531,ENSP00000262133,ENSP00000262158,ENSP00000262506,ENSP00000262809,ENSP00000263025…	AGO1,AKT1,AR,ARID1A,ATAD2,ATM,AURKA,BCL6,BLM,CBX3,CCNB1,CDK1,CDK2,CDK6,CDK9,CDKN1B,CHD3,CHD4,CHEK2,CNOT1,CREB1,CSNK2A1,CSNK2A2,CSNK2B,CTNNB1,E2F1,EED,EHMT1,EHMT2,ELL,EP300,ESR1,ESR2,ESRRA,ESRRB,EZH2,FANCI,FOS,FOXO3,FOXP3,G6PD,GATAD2B,GLS,GPAM,H2AFX,HDAC1,HDAC2,HDAC3,HDAC4,HDAC6,HES1,HEY2,HIPK2,HIST1H2BJ,HIST1H2BL,HIST2H2AC,HIST2H2BE,HNF4A,HSPD1,ING2,JUN,KAT2A,KAT2B,KAT5,KMT2A,LRPPRC,MAPK3,MAX,MDC…
HSA-597592	Post-translational protein modification	178	1366	3.23e-16	ENSP00000216129,ENSP00000216802,ENSP00000216911,ENSP00000217133,ENSP00000218089,ENSP00000218348,ENSP00000225916,ENSP00000229179,ENSP00000229268,ENSP00000230085,ENSP00000231498,ENSP00000237530,ENSP00000247461,ENSP00000248437,ENSP00000249636,ENSP00000249923,ENSP00000250495,ENSP00000252050,ENSP00000253024,ENSP00000253727,ENSP00000253778,ENSP00000254066,ENSP00000254508,ENSP00000256474,ENSP00000256682…	ANKRD28,APP,AR,ARF3,ARRB2,AURKA,BLM,BTRC,CALR,CANX,CAPZA1,CAPZB,CDC20,CDK1,CHD3,COPA,COPB1,COPB2,COPG1,COPG2,COPS4,COPS5,CUL4A,CUL4B,CUL7,CUL9,DCAF11,DCAF13,DCAF5,DCAF7,DDB1,DNMT1,DNMT3B,DYNC1H1,EEF1A1,EEF2,ENSG00000258947,EP300,EPAS1,ESR1,FBXO7,FOXL2,FOXO4,GANAB,GFPT1,GFPT2,HCFC1,HDAC1,HDAC2,HDAC4,HERC2,HIC1,HIF1A,HIPK2,HIST1H2BJ,HIST1H2BL,HIST2H2AB,HIST2H2AC,HIST2H2BE,HNRNPK,HSP90B1,HSPA8,IDE,I…
HSA-975957	Nonsense Mediated Decay (NMD) enhanced by the Exon Junction Complex (EJC)	43	112	3.76e-16	ENSP00000222247,ENSP00000225430,ENSP00000230050,ENSP00000251453,ENSP00000262584,ENSP00000296674,ENSP00000309334,ENSP00000309830,ENSP00000311430,ENSP00000313007,ENSP00000322419,ENSP00000324804,ENSP00000339095,ENSP00000339795,ENSP00000341885,ENSP00000346001,ENSP00000346027,ENSP00000346037,ENSP00000346050,ENSP00000346067,ENSP00000348849,ENSP00000359345,ENSP00000361076,ENSP00000362744,ENSP00000363018…	EIF4G1,NCBP1,PABPC1,PPP2R1A,RPL10,RPL10A,RPL14,RPL15,RPL18A,RPL19,RPL21,RPL23A,RPL26,RPL3,RPL30,RPL38,RPL4,RPL5,RPL6,RPL7,RPL7A,RPL8,RPL9,RPLP0,RPLP1,RPLP2,RPS10,RPS12,RPS14,RPS15,RPS16,RPS19,RPS2,RPS23,RPS24,RPS26,RPS3A,RPS4X,RPS5,RPS6,RPS7,RPSA,UPF1
HSA-2408557	Selenocysteine synthesis	39	90	4.55e-16	ENSP00000222247,ENSP00000225430,ENSP00000230050,ENSP00000234677,ENSP00000251453,ENSP00000262584,ENSP00000296674,ENSP00000309334,ENSP00000309830,ENSP00000311430,ENSP00000322419,ENSP00000339095,ENSP00000339795,ENSP00000341885,ENSP00000346001,ENSP00000346027,ENSP00000346037,ENSP00000346050,ENSP00000346067,ENSP00000348849,ENSP00000359345,ENSP00000361076,ENSP00000362744,ENSP00000363018,ENSP00000369757…	RPL10,RPL10A,RPL14,RPL15,RPL18A,RPL19,RPL21,RPL23A,RPL26,RPL3,RPL30,RPL38,RPL4,RPL5,RPL6,RPL7,RPL7A,RPL8,RPL9,RPLP0,RPLP1,RPLP2,RPS10,RPS12,RPS14,RPS15,RPS16,RPS19,RPS2,RPS23,RPS24,RPS26,RPS3A,RPS4X,RPS5,RPS6,RPS7,RPSA,SARS
HSA-69620	Cell Cycle Checkpoints	65	265	4.83e-16	ENSP00000216122,ENSP00000216802,ENSP00000228872,ENSP00000229179,ENSP00000234296,ENSP00000256442,ENSP00000258149,ENSP00000261396,ENSP00000261609,ENSP00000262105,ENSP00000262971,ENSP00000264156,ENSP00000264335,ENSP00000265295,ENSP00000265433,ENSP00000266970,ENSP00000269305,ENSP00000278616,ENSP00000283195,ENSP00000287598,ENSP00000293362,ENSP00000298139,ENSP00000309474,ENSP00000310129,ENSP00000310572…	AHCTF1,ANAPC1,ANAPC15,ANAPC7,ATM,BLM,BUB1B,CCNB1,CDC20,CDC23,CDC27,CDK1,CDK2,CDKN1B,CENPA,CENPF,CHEK2,CKAP5,DYNC1H1,H2AFX,HERC2,HIST1H2BJ,HIST1H2BL,HIST2H2BE,INCENP,KAT5,MCM10,MCM4,MCM5,MCM6,MDC1,MDM2,MRE11A,NBN,NUP107,NUP133,NUP160,ORC2,PIAS4,PPP1CC,PPP2R1A,PSMC2,PSMC3,PSMC5,PSMC6,PSMD1,PSMD12,PSMD2,PSME2,PSME3,RAD50,RAD9A,RANBP2,RANGAP1,RCC2,SEC13,SPDL1,TP53,TP53BP1,UBE2D1,UBE2N,WHSC1,WRN,XPO1,…
HSA-9010553	Regulation of expression of SLITs and ROBOs	51	164	4.83e-16	ENSP00000216802,ENSP00000222247,ENSP00000225430,ENSP00000230050,ENSP00000251453,ENSP00000262584,ENSP00000293362,ENSP00000296674,ENSP00000309334,ENSP00000309474,ENSP00000309830,ENSP00000310129,ENSP00000310572,ENSP00000311430,ENSP00000313007,ENSP00000322419,ENSP00000339095,ENSP00000339795,ENSP00000341885,ENSP00000346001,ENSP00000346027,ENSP00000346037,ENSP00000346050,ENSP00000346067,ENSP00000348442…	EIF4G1,NCBP1,PABPC1,PSMC2,PSMC3,PSMC5,PSMC6,PSMD1,PSMD12,PSMD2,PSME2,PSME3,RPL10,RPL10A,RPL14,RPL15,RPL18A,RPL19,RPL21,RPL23A,RPL26,RPL3,RPL30,RPL38,RPL4,RPL5,RPL6,RPL7,RPL7A,RPL8,RPL9,RPLP0,RPLP1,RPLP2,RPS10,RPS12,RPS14,RPS15,RPS16,RPS19,RPS2,RPS23,RPS24,RPS26,RPS3A,RPS4X,RPS5,RPS6,RPS7,RPSA,ZSWIM8
HSA-71291	Metabolism of amino acids and derivatives	76	354	5.2e-16	ENSP00000168216,ENSP00000175506,ENSP00000205402,ENSP00000216802,ENSP00000217426,ENSP00000222214,ENSP00000222247,ENSP00000222673,ENSP00000225430,ENSP00000227868,ENSP00000230050,ENSP00000234677,ENSP00000251453,ENSP00000262584,ENSP00000264170,ENSP00000265594,ENSP00000265838,ENSP00000269980,ENSP00000277865,ENSP00000280346,ENSP00000292147,ENSP00000293362,ENSP00000296674,ENSP00000299198,ENSP00000307241…	ACAT1,AHCY,ASNS,ASS1,BCKDHA,CKB,CPS1,DBT,DLAT,DLD,DLST,ETHE1,GCDH,GLS,GLUD1,HSD17B10,IVD,KARS,KYNU,MCCC1,MCCC2,OAT,OGDH,PDHA1,PDHB,PDHX,PSMC2,PSMC3,PSMC5,PSMC6,PSMD1,PSMD12,PSMD2,PSME2,PSME3,PYCR1,PYCR2,RPL10,RPL10A,RPL14,RPL15,RPL18A,RPL19,RPL21,RPL23A,RPL26,RPL3,RPL30,RPL38,RPL4,RPL5,RPL6,RPL7,RPL7A,RPL8,RPL9,RPLP0,RPLP1,RPLP2,RPS10,RPS12,RPS14,RPS15,RPS16,RPS19,RPS2,RPS23,RPS24,RPS26,RPS3A,RPS…
HSA-192823	Viral mRNA Translation	38	86	6.39e-16	ENSP00000222247,ENSP00000225430,ENSP00000230050,ENSP00000251453,ENSP00000262584,ENSP00000296674,ENSP00000309334,ENSP00000309830,ENSP00000311430,ENSP00000322419,ENSP00000339095,ENSP00000339795,ENSP00000341885,ENSP00000346001,ENSP00000346027,ENSP00000346037,ENSP00000346050,ENSP00000346067,ENSP00000348849,ENSP00000359345,ENSP00000361076,ENSP00000362744,ENSP00000363018,ENSP00000369757,ENSP00000379506…	RPL10,RPL10A,RPL14,RPL15,RPL18A,RPL19,RPL21,RPL23A,RPL26,RPL3,RPL30,RPL38,RPL4,RPL5,RPL6,RPL7,RPL7A,RPL8,RPL9,RPLP0,RPLP1,RPLP2,RPS10,RPS12,RPS14,RPS15,RPS16,RPS19,RPS2,RPS23,RPS24,RPS26,RPS3A,RPS4X,RPS5,RPS6,RPS7,RPSA
HSA-72163	mRNA Splicing - Major Pathway	52	178	1.89e-15	ENSP00000156471,ENSP00000215793,ENSP00000216277,ENSP00000230640,ENSP00000238112,ENSP00000245934,ENSP00000254108,ENSP00000261531,ENSP00000265872,ENSP00000266079,ENSP00000268482,ENSP00000300291,ENSP00000301740,ENSP00000307863,ENSP00000310448,ENSP00000310723,ENSP00000313199,ENSP00000317123,ENSP00000318861,ENSP00000326261,ENSP00000335321,ENSP00000336741,ENSP00000349168,ENSP00000351137,ENSP00000359645…	ALYREF,AQR,CCAR1,CHERP,CPSF1,CPSF3,CRNKL1,CWC15,DDX23,DDX42,DDX46,DHX15,DHX16,DHX38,EFTUD2,ELAVL1,FUS,HNRNPA3,HNRNPD,HNRNPF,HNRNPH1,HNRNPK,HNRNPUL1,HSPA8,NCBP1,NUDT21,PAPOLA,POLR2A,PRPF40A,PRPF6,PRPF8,PUF60,RBMX,SART1,SF3A1,SF3B1,SF3B2,SKIV2L2,SNRNP200,SNRNP70,SNW1,SRRM1,SRRM2,SRSF2,SRSF3,SRSF4,SRSF5,SYMPK,U2AF2,U2SURP,XAB2,YBX1
HSA-72764	Eukaryotic Translation Termination	38	90	2.01e-15	ENSP00000222247,ENSP00000225430,ENSP00000230050,ENSP00000251453,ENSP00000262584,ENSP00000296674,ENSP00000309334,ENSP00000309830,ENSP00000311430,ENSP00000322419,ENSP00000339095,ENSP00000339795,ENSP00000341885,ENSP00000346001,ENSP00000346027,ENSP00000346037,ENSP00000346050,ENSP00000346067,ENSP00000348849,ENSP00000359345,ENSP00000361076,ENSP00000362744,ENSP00000363018,ENSP00000369757,ENSP00000379506…	RPL10,RPL10A,RPL14,RPL15,RPL18A,RPL19,RPL21,RPL23A,RPL26,RPL3,RPL30,RPL38,RPL4,RPL5,RPL6,RPL7,RPL7A,RPL8,RPL9,RPLP0,RPLP1,RPLP2,RPS10,RPS12,RPS14,RPS15,RPS16,RPS19,RPS2,RPS23,RPS24,RPS26,RPS3A,RPS4X,RPS5,RPS6,RPS7,RPSA
HSA-3247509	Chromatin modifying enzymes	60	238	2.55e-15	ENSP00000225916,ENSP00000226574,ENSP00000235090,ENSP00000254480,ENSP00000261497,ENSP00000263253,ENSP00000263360,ENSP00000263754,ENSP00000264183,ENSP00000264674,ENSP00000265773,ENSP00000267064,ENSP00000268712,ENSP00000274031,ENSP00000278823,ENSP00000302967,ENSP00000308022,ENSP00000308741,ENSP00000309555,ENSP00000316578,ENSP00000318297,ENSP00000319169,ENSP00000320147,ENSP00000320485,ENSP00000332194…	ARID1A,ARID4B,ATXN7L3,CHD3,CHD4,CLOCK,DOT1L,EED,EHMT1,EHMT2,EP300,EZH2,GATAD2B,H2AFX,HCFC1,HDAC1,HDAC2,HDAC3,HIST1H2BJ,HIST1H2BL,HIST2H2AB,HIST2H2AC,HIST2H2BE,IKBKAP,KAT2A,KAT2B,KAT5,KAT8,KDM1A,KMT2A,MECOM,MTA1,MTA2,NCOR1,NFKB1,NSD1,PBRM1,PRMT1,PRMT5,RBBP4,RBBP7,RELA,RPS2,RUVBL1,RUVBL2,SETD7,SMARCA2,SMARCA4,SMARCC1,SMARCC2,SMARCD2,SUPT7L,SUV39H1,SUZ12,TADA2B,TBL1XR1,TRRAP,USP22,WDR77,WHSC1
HSA-1799339	SRP-dependent cotranslational protein targeting to membrane	41	109	2.92e-15	ENSP00000222247,ENSP00000225430,ENSP00000230050,ENSP00000237530,ENSP00000251453,ENSP00000262584,ENSP00000296674,ENSP00000309334,ENSP00000309830,ENSP00000311430,ENSP00000312066,ENSP00000322419,ENSP00000339095,ENSP00000339795,ENSP00000341885,ENSP00000342181,ENSP00000346001,ENSP00000346027,ENSP00000346037,ENSP00000346050,ENSP00000346067,ENSP00000348849,ENSP00000359345,ENSP00000361076,ENSP00000362744…	RPL10,RPL10A,RPL14,RPL15,RPL18A,RPL19,RPL21,RPL23A,RPL26,RPL3,RPL30,RPL38,RPL4,RPL5,RPL6,RPL7,RPL7A,RPL8,RPL9,RPLP0,RPLP1,RPLP2,RPN2,RPS10,RPS12,RPS14,RPS15,RPS16,RPS19,RPS2,RPS23,RPS24,RPS26,RPS3A,RPS4X,RPS5,RPS6,RPS7,RPSA,SRP68,SRP72
HSA-1430728	Metabolism	231	2032	3.67e-15	ENSP00000168216,ENSP00000175506,ENSP00000203407,ENSP00000205402,ENSP00000215375,ENSP00000216027,ENSP00000216392,ENSP00000216780,ENSP00000216802,ENSP00000216962,ENSP00000217244,ENSP00000217426,ENSP00000222214,ENSP00000222247,ENSP00000222673,ENSP00000225430,ENSP00000227868,ENSP00000228740,ENSP00000229179,ENSP00000229239,ENSP00000230050,ENSP00000230792,ENSP00000231498,ENSP00000232219,ENSP00000233627…	ACACA,ACAD9,ACADVL,ACAT1,ACLY,ACOT9,ACSF2,ACSF3,ACSL3,ACSS1,ACSS2,AHCY,AHR,AKR1D1,AKT1,ALAS1,ALDH1L1,ALDH1L2,ALDH2,ARF3,ARNTL,ASNS,ASS1,ATIC,ATP5A1,ATP5B,ATP5D,BCKDHA,CA5A,CACNA1C,CAD,CKB,CLOCK,CPOX,CPS1,CSNK2A1,CSNK2A2,CSNK2B,DBT,DEGS1,DLAT,DLD,DLST,DNM2,ECHS1,EP300,ESRRA,ETFA,ETHE1,FADS1,FASN,FECH,FH,FHL2,FLAD1,G6PD,GAPDH,GART,GCDH,GCKR,GLS,GLUD1,GMPS,GPAM,GPX1,GSTP1,GSTT2B,GYG2,GYS1,HADHA,HDAC…
HSA-73894	DNA Repair	66	290	5.22e-15	ENSP00000156471,ENSP00000216714,ENSP00000233146,ENSP00000234420,ENSP00000243326,ENSP00000249636,ENSP00000250416,ENSP00000261245,ENSP00000261609,ENSP00000262809,ENSP00000262971,ENSP00000263253,ENSP00000263681,ENSP00000264389,ENSP00000265433,ENSP00000266970,ENSP00000269305,ENSP00000278616,ENSP00000283131,ENSP00000285021,ENSP00000298139,ENSP00000301764,ENSP00000310842,ENSP00000311360,ENSP00000313420…	APEX1,AQR,ASCC3,ATM,BAZ1B,BLM,CDK2,CHEK2,COPS4,COPS5,CUL4A,CUL4B,DDB1,ELL,EP300,FANCA,FANCI,H2AFX,HERC2,HIST1H2BJ,HIST1H2BL,HIST2H2BE,KAT5,KPNA2,MAPK8,MDC1,MNAT1,MRE11A,MSH2,MSH6,NBN,PARP1,PARP2,PIAS1,PIAS3,PIAS4,POLD2,POLD3,POLE,POLH,POLR2A,PRKDC,RAD50,RAD9A,RFC1,RIF1,RUVBL1,SIRT6,SMARCA5,TDG,TP53,TP53BP1,TRIM25,UBE2I,UBE2N,USP10,USP7,UVSSA,VCP,WHSC1,WRN,XAB2,XPA,XPC,XRCC5,XRCC6
HSA-2408522	Selenoamino acid metabolism	41	112	5.88e-15	ENSP00000217426,ENSP00000222247,ENSP00000225430,ENSP00000230050,ENSP00000234677,ENSP00000251453,ENSP00000262584,ENSP00000296674,ENSP00000309334,ENSP00000309830,ENSP00000311430,ENSP00000322419,ENSP00000325448,ENSP00000339095,ENSP00000339795,ENSP00000341885,ENSP00000346001,ENSP00000346027,ENSP00000346037,ENSP00000346050,ENSP00000346067,ENSP00000348849,ENSP00000359345,ENSP00000361076,ENSP00000362744…	AHCY,KARS,RPL10,RPL10A,RPL14,RPL15,RPL18A,RPL19,RPL21,RPL23A,RPL26,RPL3,RPL30,RPL38,RPL4,RPL5,RPL6,RPL7,RPL7A,RPL8,RPL9,RPLP0,RPLP1,RPLP2,RPS10,RPS12,RPS14,RPS15,RPS16,RPS19,RPS2,RPS23,RPS24,RPS26,RPS3A,RPS4X,RPS5,RPS6,RPS7,RPSA,SARS
HSA-3371556	Cellular response to heat stress	36	85	1.03e-14	ENSP00000001008,ENSP00000212015,ENSP00000229179,ENSP00000231498,ENSP00000254508,ENSP00000261396,ENSP00000262177,ENSP00000263025,ENSP00000263253,ENSP00000264335,ENSP00000278616,ENSP00000283195,ENSP00000285968,ENSP00000297185,ENSP00000302961,ENSP00000307272,ENSP00000310668,ENSP00000310670,ENSP00000324173,ENSP00000333948,ENSP00000334061,ENSP00000335153,ENSP00000339063,ENSP00000351777,ENSP00000352400…	ATM,CCAR2,DNAJB6,EEF1A1,EP300,FKBP4,HDAC6,HSF1,HSP90AA1,HSPA1A,HSPA1L,HSPA2,HSPA4,HSPA5,HSPA8,HSPA9,MAPK3,MTOR,NUP107,NUP133,NUP153,NUP155,NUP160,NUP188,NUP205,NUP210,NUP214,NUP88,NUP93,RANBP2,RPS19BP1,RPTOR,SIRT1,TPR,VCP,YWHAE
HSA-1266738	Developmental Biology	140	1023	3.31e-14	ENSP00000216181,ENSP00000216802,ENSP00000217133,ENSP00000217244,ENSP00000222247,ENSP00000225430,ENSP00000225916,ENSP00000226574,ENSP00000230050,ENSP00000232424,ENSP00000248437,ENSP00000250003,ENSP00000251453,ENSP00000254066,ENSP00000257555,ENSP00000261531,ENSP00000262013,ENSP00000262506,ENSP00000262584,ENSP00000263025,ENSP00000263238,ENSP00000263253,ENSP00000263360,ENSP00000263734,ENSP00000263754…	ACTR2,ACTR3,AKT1,AP2B1,CACNA1C,CAP1,CAPN1,CLTC,COL5A1,CREB1,CSNK2A1,CSNK2A2,CSNK2B,CTCF,CTNNA1,CTNNB1,DNM2,DPYSL2,DSP,EED,EIF4G1,ENSG00000258947,EP300,EPAS1,EZH2,EZR,FGF10,FOXO1,FOXO3,H2AFX,HDAC3,HELZ2,HES1,HIST1H2BJ,HIST1H2BL,HIST2H2AC,HIST2H2BE,HNF1A,HSP90AA1,HSPA8,IRS2,JUN,KAT2A,KAT2B,KIAA1598,KIF4A,KRT3,KRT78,KRT79,MAPK3,MAPK8,MED12,MEF2C,MSN,MYH10,MYH14,MYH9,MYOD1,NCBP1,NCOR1,NFKB1,PABPC1,PC…
HSA-2559583	Cellular Senescence	47	161	4.84e-14	ENSP00000226574,ENSP00000228872,ENSP00000244534,ENSP00000244573,ENSP00000258149,ENSP00000263025,ENSP00000263360,ENSP00000264657,ENSP00000265433,ENSP00000265734,ENSP00000266970,ENSP00000267163,ENSP00000267415,ENSP00000269305,ENSP00000278616,ENSP00000306245,ENSP00000307705,ENSP00000316578,ENSP00000320147,ENSP00000325863,ENSP00000329357,ENSP00000330074,ENSP00000332194,ENSP00000339109,ENSP00000340330…	AGO1,ANAPC1,ANAPC15,ANAPC7,ATM,CDC23,CDC27,CDK2,CDK6,CDKN1B,E2F1,EED,EHMT1,EHMT2,EZH2,FOS,FZR1,H2AFX,HIST1H1A,HIST1H1B,HIST1H1D,HIST1H1E,HIST1H2BJ,HIST1H2BL,HIST2H2AC,HIST2H2BE,JUN,KAT5,MAP2K4,MAPK3,MAPK8,MDM2,MOV10,MRE11A,NBN,NFKB1,RAD50,RB1,RBBP4,RBBP7,RELA,SP1,STAT3,SUZ12,TINF2,TP53,UBE2D1
HSA-2467813	Separation of Sister Chromatids	49	178	8.22e-14	ENSP00000216802,ENSP00000217133,ENSP00000218089,ENSP00000229179,ENSP00000248437,ENSP00000261396,ENSP00000264071,ENSP00000265295,ENSP00000283195,ENSP00000287598,ENSP00000293362,ENSP00000297338,ENSP00000298767,ENSP00000301071,ENSP00000301072,ENSP00000303427,ENSP00000309474,ENSP00000310129,ENSP00000310572,ENSP00000313851,ENSP00000320295,ENSP00000323421,ENSP00000324804,ENSP00000336868,ENSP00000339109…	AHCTF1,ANAPC1,ANAPC15,ANAPC7,BUB1B,CDC20,CDC23,CDC27,CENPA,CENPF,CKAP5,DYNC1H1,ENSG00000258947,INCENP,NUP107,NUP133,NUP160,PDS5A,PDS5B,PPP1CC,PPP2R1A,PSMC2,PSMC3,PSMC5,PSMC6,PSMD1,PSMD12,PSMD2,PSME2,PSME3,RAD21,RANBP2,RANGAP1,RCC2,SEC13,SMC1A,SMC3,SPDL1,STAG2,TUBA1A,TUBA1C,TUBA4A,TUBB1,TUBB2A,TUBB4A,TUBB8,UBE2D1,WAPAL,XPO1
HSA-1257604	PIP3 activates AKT signaling	57	242	1.51e-13	ENSP00000216802,ENSP00000217244,ENSP00000219476,ENSP00000219548,ENSP00000228872,ENSP00000244050,ENSP00000258149,ENSP00000262506,ENSP00000263025,ENSP00000263360,ENSP00000264664,ENSP00000264674,ENSP00000268058,ENSP00000269305,ENSP00000278823,ENSP00000287820,ENSP00000293362,ENSP00000296782,ENSP00000302967,ENSP00000304895,ENSP00000307272,ENSP00000309474,ENSP00000310129,ENSP00000310572,ENSP00000316578…	AGO1,AKT1,CDKN1B,CHD3,CHD4,CREB1,CSNK2A1,CSNK2A2,CSNK2B,EED,ESR1,ESR2,EZH2,FGF10,FOXO1,FOXO3,FOXO4,GATAD2B,HDAC1,HDAC2,HDAC3,IRS1,IRS2,JUN,KDM1A,MAPK3,MDM2,MECOM,MOV10,MTA1,MTA2,MTOR,PIK3R1,PIP5K1A,PML,PPARG,PPP2R1A,PSMC2,PSMC3,PSMC5,PSMC6,PSMD1,PSMD12,PSMD2,PSME2,PSME3,RBBP4,RBBP7,RICTOR,RPTOR,SNAI1,STUB1,SUZ12,THEM4,TP53,TSC2,USP7
HSA-422475	Axon guidance	91	541	1.51e-13	ENSP00000216181,ENSP00000216802,ENSP00000217133,ENSP00000217244,ENSP00000222247,ENSP00000225430,ENSP00000230050,ENSP00000248437,ENSP00000251453,ENSP00000262506,ENSP00000262584,ENSP00000263025,ENSP00000263238,ENSP00000264071,ENSP00000266376,ENSP00000293362,ENSP00000296674,ENSP00000301071,ENSP00000301072,ENSP00000309334,ENSP00000309474,ENSP00000309539,ENSP00000309830,ENSP00000310129,ENSP00000310572…	ACTR2,ACTR3,AP2B1,CACNA1C,CAP1,CLTC,COL5A1,CREB1,CSNK2A1,CSNK2A2,CSNK2B,DNM2,DPYSL2,EIF4G1,ENSG00000258947,EZR,HSP90AA1,HSPA8,IRS2,KIAA1598,KIF4A,MAPK3,MAPK8,MSN,MYH10,MYH14,MYH9,NCBP1,PABPC1,PIK3R1,PITPNA,PSMC2,PSMC3,PSMC5,PSMC6,PSMD1,PSMD12,PSMD2,PSME2,PSME3,RPL10,RPL10A,RPL14,RPL15,RPL18A,RPL19,RPL21,RPL23A,RPL26,RPL3,RPL30,RPL38,RPL4,RPL5,RPL6,RPL7,RPL7A,RPL8,RPL9,RPLP0,RPLP1,RPLP2,RPS10,RPS1…
HSA-3700989	Transcriptional Regulation by TP53	71	359	1.63e-13	ENSP00000216911,ENSP00000217244,ENSP00000219476,ENSP00000228872,ENSP00000233146,ENSP00000256442,ENSP00000258149,ENSP00000260665,ENSP00000261245,ENSP00000262133,ENSP00000262506,ENSP00000262809,ENSP00000263253,ENSP00000264335,ENSP00000264731,ENSP00000265433,ENSP00000266970,ENSP00000268058,ENSP00000269305,ENSP00000278616,ENSP00000278823,ENSP00000296782,ENSP00000296930,ENSP00000298139,ENSP00000306245…	AGO1,AKT1,ATM,AURKA,BCL6,BLM,CCNB1,CDK1,CDK2,CDK9,CDKN1B,CHD3,CHD4,CHEK2,CNOT1,CSNK2A1,CSNK2A2,CSNK2B,E2F1,EHMT1,EHMT2,ELL,EP300,FANCI,FOS,G6PD,GATAD2B,GLS,HDAC1,HDAC2,HIPK2,ING2,JUN,KAT5,LRPPRC,MDC1,MDM2,MNAT1,MOV10,MRE11A,MSH2,MTA2,MTOR,NBN,NOC2L,NPM1,PML,POLR2A,PPP2R1A,PRMT1,PRMT5,RAD50,RAD9A,RBBP4,RBBP7,RBL1,RBL2,RICTOR,RPTOR,STK11,SUPT5H,TAF15,TAF2,TNKS1BP1,TP53,TP63,TP73,TSC2,USP7,WRN,YWHAE
HSA-212165	Epigenetic regulation of gene expression	39	115	2.07e-13	ENSP00000212015,ENSP00000225916,ENSP00000254605,ENSP00000261245,ENSP00000263253,ENSP00000263360,ENSP00000263754,ENSP00000263857,ENSP00000264183,ENSP00000278823,ENSP00000283131,ENSP00000302640,ENSP00000316578,ENSP00000320147,ENSP00000328547,ENSP00000332194,ENSP00000333633,ENSP00000333920,ENSP00000335321,ENSP00000336687,ENSP00000337976,ENSP00000342434,ENSP00000346120,ENSP00000349508,ENSP00000352516…	ARID4B,BAZ1B,BAZ2A,CBX3,CHD3,CHD4,DDX21,DNMT1,DNMT3B,EED,EHMT2,EP300,EZH2,GATAD2B,H2AFX,HDAC1,HDAC2,HIST1H2BJ,HIST1H2BL,HIST2H2AC,HIST2H2BE,KAT2A,KAT2B,MNAT1,MTA1,MTA2,MYBBP1A,POLR1A,RBBP4,RBBP7,RRP8,SF3B1,SIRT1,SMARCA5,SUV39H1,SUZ12,TDG,TTF1,UBTF
HSA-376176	Signaling by ROBO receptors	52	210	3.92e-13	ENSP00000216802,ENSP00000222247,ENSP00000225430,ENSP00000230050,ENSP00000251453,ENSP00000262584,ENSP00000293362,ENSP00000296674,ENSP00000309334,ENSP00000309474,ENSP00000309830,ENSP00000310129,ENSP00000310572,ENSP00000311430,ENSP00000313007,ENSP00000322419,ENSP00000339095,ENSP00000339795,ENSP00000341885,ENSP00000346001,ENSP00000346027,ENSP00000346037,ENSP00000346050,ENSP00000346067,ENSP00000348442…	CAP1,EIF4G1,NCBP1,PABPC1,PSMC2,PSMC3,PSMC5,PSMC6,PSMD1,PSMD12,PSMD2,PSME2,PSME3,RPL10,RPL10A,RPL14,RPL15,RPL18A,RPL19,RPL21,RPL23A,RPL26,RPL3,RPL30,RPL38,RPL4,RPL5,RPL6,RPL7,RPL7A,RPL8,RPL9,RPLP0,RPLP1,RPLP2,RPS10,RPS12,RPS14,RPS15,RPS16,RPS19,RPS2,RPS23,RPS24,RPS26,RPS3A,RPS4X,RPS5,RPS6,RPS7,RPSA,ZSWIM8
HSA-68877	Mitotic Prometaphase	49	190	5.96e-13	ENSP00000217133,ENSP00000217244,ENSP00000218089,ENSP00000229179,ENSP00000248437,ENSP00000256442,ENSP00000261396,ENSP00000262506,ENSP00000264071,ENSP00000264335,ENSP00000265295,ENSP00000283195,ENSP00000286398,ENSP00000287598,ENSP00000297338,ENSP00000298767,ENSP00000301071,ENSP00000301072,ENSP00000303427,ENSP00000313851,ENSP00000320295,ENSP00000323421,ENSP00000324804,ENSP00000325017,ENSP00000327077…	AHCTF1,BUB1B,CCNB1,CDC20,CDK1,CENPA,CENPF,CEP131,CKAP5,CSNK2A1,CSNK2A2,CSNK2B,DYNC1H1,ENSG00000258947,HSP90AA1,INCENP,NCAPD2,NUMA1,NUP107,NUP133,NUP160,ODF2,PCM1,PCNT,PDS5A,PDS5B,PPP1CC,PPP2R1A,RAD21,RANBP2,RANGAP1,RCC2,SEC13,SMC1A,SMC2,SMC3,SMC4,SPDL1,STAG2,TUBA1A,TUBA1C,TUBA4A,TUBB1,TUBB2A,TUBB4A,TUBB8,WAPAL,XPO1,YWHAE
HSA-6807070	PTEN Regulation	40	135	3.36e-12	ENSP00000216802,ENSP00000217244,ENSP00000219548,ENSP00000244050,ENSP00000262506,ENSP00000263025,ENSP00000263360,ENSP00000264674,ENSP00000268058,ENSP00000269305,ENSP00000278823,ENSP00000287820,ENSP00000293362,ENSP00000302967,ENSP00000307272,ENSP00000309474,ENSP00000310129,ENSP00000310572,ENSP00000316578,ENSP00000320147,ENSP00000333633,ENSP00000343535,ENSP00000348442,ENSP00000349508,ENSP00000354558…	AGO1,AKT1,CHD3,CHD4,CSNK2A1,CSNK2A2,CSNK2B,EED,EZH2,GATAD2B,HDAC1,HDAC2,HDAC3,JUN,KDM1A,MAPK3,MECOM,MOV10,MTA1,MTA2,MTOR,PML,PPARG,PSMC2,PSMC3,PSMC5,PSMC6,PSMD1,PSMD12,PSMD2,PSME2,PSME3,RBBP4,RBBP7,RPTOR,SNAI1,STUB1,SUZ12,TP53,USP7
HSA-69242	S Phase	43	156	3.36e-12	ENSP00000216122,ENSP00000216802,ENSP00000218089,ENSP00000228872,ENSP00000234296,ENSP00000261245,ENSP00000262105,ENSP00000262133,ENSP00000263681,ENSP00000264156,ENSP00000266970,ENSP00000267163,ENSP00000274255,ENSP00000293362,ENSP00000297338,ENSP00000298767,ENSP00000303427,ENSP00000309474,ENSP00000310129,ENSP00000310572,ENSP00000313851,ENSP00000322570,ENSP00000323421,ENSP00000339109,ENSP00000345571…	AKT1,ANAPC1,ANAPC15,ANAPC7,CDC23,CDC27,CDK2,CDKN1B,E2F1,FZR1,MAX,MCM4,MCM5,MCM6,MNAT1,MYC,ORC2,PDS5A,PDS5B,POLA1,POLD2,POLD3,POLE,PSMC2,PSMC3,PSMC5,PSMC6,PSMD1,PSMD12,PSMD2,PSME2,PSME3,RAD21,RB1,RBBP4,RBL2,RFC1,SKP2,SMC1A,SMC3,STAG2,UBE2D1,WAPAL
HSA-9006925	Intracellular signaling by second messengers	58	274	3.83e-12	ENSP00000216802,ENSP00000217244,ENSP00000219476,ENSP00000219548,ENSP00000228872,ENSP00000244050,ENSP00000258149,ENSP00000262506,ENSP00000263025,ENSP00000263360,ENSP00000264664,ENSP00000264674,ENSP00000268058,ENSP00000269305,ENSP00000278823,ENSP00000287820,ENSP00000293362,ENSP00000296782,ENSP00000302967,ENSP00000304895,ENSP00000307272,ENSP00000309474,ENSP00000310129,ENSP00000310572,ENSP00000316578…	AGO1,AKT1,CDKN1B,CHD3,CHD4,CREB1,CSNK2A1,CSNK2A2,CSNK2B,EED,ESR1,ESR2,EZH2,FGF10,FOXO1,FOXO3,FOXO4,GATAD2B,HDAC1,HDAC2,HDAC3,IRS1,IRS2,ITPR3,JUN,KDM1A,MAPK3,MDM2,MECOM,MOV10,MTA1,MTA2,MTOR,PIK3R1,PIP5K1A,PML,PPARG,PPP2R1A,PSMC2,PSMC3,PSMC5,PSMC6,PSMD1,PSMD12,PSMD2,PSME2,PSME3,RBBP4,RBBP7,RICTOR,RPTOR,SNAI1,STUB1,SUZ12,THEM4,TP53,TSC2,USP7
HSA-5633007	Regulation of TP53 Activity	43	159	5.53e-12	ENSP00000216911,ENSP00000217244,ENSP00000258149,ENSP00000262506,ENSP00000263253,ENSP00000264731,ENSP00000265433,ENSP00000266970,ENSP00000268058,ENSP00000269305,ENSP00000278616,ENSP00000278823,ENSP00000296782,ENSP00000298139,ENSP00000307183,ENSP00000311360,ENSP00000317992,ENSP00000319169,ENSP00000324804,ENSP00000324856,ENSP00000325863,ENSP00000340330,ENSP00000343535,ENSP00000347232,ENSP00000349508…	AKT1,ATM,AURKA,BLM,CDK1,CDK2,CHD3,CHD4,CHEK2,CSNK2A1,CSNK2A2,CSNK2B,EHMT1,EHMT2,EP300,GATAD2B,HDAC1,HDAC2,HIPK2,ING2,KAT5,MDM2,MRE11A,MTA2,MTOR,NBN,NOC2L,PML,PPP2R1A,PRMT5,RAD50,RAD9A,RBBP4,RBBP7,RICTOR,STK11,TAF15,TAF2,TP53,TP63,TP73,USP7,WRN
HSA-3108214	SUMOylation of DNA damage response and repair proteins	29	69	6.69e-12	ENSP00000218089,ENSP00000229179,ENSP00000231498,ENSP00000249636,ENSP00000254508,ENSP00000261396,ENSP00000261609,ENSP00000262971,ENSP00000268058,ENSP00000283195,ENSP00000285021,ENSP00000285968,ENSP00000297338,ENSP00000298139,ENSP00000310668,ENSP00000323421,ENSP00000347232,ENSP00000348056,ENSP00000352400,ENSP00000354720,ENSP00000355759,ENSP00000356448,ENSP00000358019,ENSP00000361658,ENSP00000365588…	BLM,HERC2,MDC1,NSMCE4A,NUP107,NUP133,NUP153,NUP155,NUP160,NUP188,NUP205,NUP210,NUP214,NUP88,NUP93,PARP1,PIAS1,PIAS4,PML,RAD21,RANBP2,SMC1A,SMC3,STAG2,TDG,TPR,UBE2I,WRN,XPC
HSA-3371453	Regulation of HSF1-mediated heat shock response	28	65	1.05e-11	ENSP00000212015,ENSP00000229179,ENSP00000231498,ENSP00000254508,ENSP00000261396,ENSP00000262177,ENSP00000263025,ENSP00000264335,ENSP00000278616,ENSP00000283195,ENSP00000285968,ENSP00000297185,ENSP00000302961,ENSP00000310668,ENSP00000310670,ENSP00000324173,ENSP00000333948,ENSP00000352400,ENSP00000356448,ENSP00000361658,ENSP00000364802,ENSP00000364805,ENSP00000367721,ENSP00000378199,ENSP00000431512…	ATM,CCAR2,DNAJB6,HSF1,HSPA1A,HSPA1L,HSPA2,HSPA4,HSPA5,HSPA8,HSPA9,MAPK3,NUP107,NUP133,NUP153,NUP155,NUP160,NUP188,NUP205,NUP210,NUP214,NUP88,NUP93,RANBP2,RPS19BP1,SIRT1,TPR,YWHAE
HSA-72202	Transport of Mature Transcript to Cytoplasm	30	77	1.22e-11	ENSP00000229179,ENSP00000231498,ENSP00000238112,ENSP00000245838,ENSP00000245934,ENSP00000254508,ENSP00000261396,ENSP00000268482,ENSP00000283195,ENSP00000285968,ENSP00000307863,ENSP00000310668,ENSP00000326261,ENSP00000352400,ENSP00000356448,ENSP00000361658,ENSP00000362820,ENSP00000362900,ENSP00000364289,ENSP00000367721,ENSP00000376276,ENSP00000397927,ENSP00000420306,ENSP00000421592,ENSP00000436679…	ALYREF,CPSF1,CPSF3,DHX38,NCBP1,NUP107,NUP133,NUP153,NUP155,NUP160,NUP188,NUP205,NUP210,NUP214,NUP88,NUP93,NXF1,POLDIP3,RANBP2,SRRM1,SRSF2,SRSF3,SRSF4,SRSF5,SYMPK,THOC2,THOC5,TPR,U2AF2,ZC3H11A
HSA-2500257	Resolution of Sister Chromatid Cohesion	36	118	2.45e-11	ENSP00000217133,ENSP00000218089,ENSP00000229179,ENSP00000248437,ENSP00000256442,ENSP00000261396,ENSP00000264071,ENSP00000265295,ENSP00000283195,ENSP00000287598,ENSP00000297338,ENSP00000298767,ENSP00000301071,ENSP00000301072,ENSP00000303427,ENSP00000313851,ENSP00000320295,ENSP00000323421,ENSP00000324804,ENSP00000336868,ENSP00000341779,ENSP00000348965,ENSP00000354720,ENSP00000355465,ENSP00000355922…	AHCTF1,BUB1B,CCNB1,CDC20,CDK1,CENPA,CENPF,CKAP5,DYNC1H1,ENSG00000258947,INCENP,NUP107,NUP133,NUP160,PDS5A,PDS5B,PPP1CC,PPP2R1A,RAD21,RANBP2,RANGAP1,RCC2,SEC13,SMC1A,SMC3,SPDL1,STAG2,TUBA1A,TUBA1C,TUBA4A,TUBB1,TUBB2A,TUBB4A,TUBB8,WAPAL,XPO1
HSA-1169410	Antiviral mechanism by IFN-stimulated genes	29	77	5.66e-11	ENSP00000229179,ENSP00000231498,ENSP00000254508,ENSP00000257570,ENSP00000261396,ENSP00000261667,ENSP00000263025,ENSP00000264350,ENSP00000283195,ENSP00000285968,ENSP00000290158,ENSP00000293831,ENSP00000296577,ENSP00000309142,ENSP00000310668,ENSP00000316176,ENSP00000323889,ENSP00000343204,ENSP00000352400,ENSP00000356448,ENSP00000358866,ENSP00000361658,ENSP00000367721,ENSP00000383274,ENSP00000416255…	ABCE1,EIF4A1,EIF4G1,EIF4G3,FLNA,FLNB,HERC5,JAK1,KPNA2,KPNA3,KPNB1,MAPK3,NUP107,NUP133,NUP153,NUP155,NUP160,NUP188,NUP205,NUP210,NUP214,NUP88,NUP93,OASL,PDE12,RANBP2,TPR,TRIM25,UBE2N
HSA-195258	RHO GTPase Effectors	55	273	7.99e-11	ENSP00000005340,ENSP00000216181,ENSP00000217133,ENSP00000228872,ENSP00000229179,ENSP00000248437,ENSP00000261396,ENSP00000263025,ENSP00000263238,ENSP00000264071,ENSP00000264335,ENSP00000265295,ENSP00000268182,ENSP00000283195,ENSP00000287598,ENSP00000301071,ENSP00000301072,ENSP00000304669,ENSP00000307078,ENSP00000316054,ENSP00000320295,ENSP00000324804,ENSP00000332194,ENSP00000336868,ENSP00000341779…	ACTR2,ACTR3,AHCTF1,AR,BUB1B,CDC20,CDKN1B,CENPA,CENPF,CKAP5,CTNNA1,CTNNB1,DIAPH3,DVL1,DVL2,DVL3,DYNC1H1,ENSG00000258947,FLNA,H2AFX,HIST1H2BJ,HIST1H2BL,HIST2H2AC,HIST2H2BE,INCENP,IQGAP1,IQGAP3,KDM1A,KIF14,KIF5B,MAPK3,MYH10,MYH14,MYH9,NCKAP1,NUP107,NUP133,NUP160,PPP1CB,PPP1CC,PPP2R1A,RANBP2,RANGAP1,RCC2,SEC13,SPDL1,TUBA1A,TUBA1C,TUBA4A,TUBB1,TUBB2A,TUBB4A,TUBB8,XPO1,YWHAE
HSA-159236	Transport of Mature mRNA derived from an Intron-Containing Transcript	27	69	1.51e-10	ENSP00000229179,ENSP00000231498,ENSP00000245838,ENSP00000254508,ENSP00000261396,ENSP00000268482,ENSP00000283195,ENSP00000285968,ENSP00000307863,ENSP00000310668,ENSP00000326261,ENSP00000352400,ENSP00000356448,ENSP00000361658,ENSP00000362820,ENSP00000362900,ENSP00000364289,ENSP00000367721,ENSP00000376276,ENSP00000397927,ENSP00000420306,ENSP00000421592,ENSP00000436679,ENSP00000438527,ENSP00000444029…	ALYREF,DHX38,NCBP1,NUP107,NUP133,NUP153,NUP155,NUP160,NUP188,NUP205,NUP210,NUP214,NUP88,NUP93,NXF1,POLDIP3,RANBP2,SRRM1,SRSF2,SRSF3,SRSF4,SRSF5,THOC2,THOC5,TPR,U2AF2,ZC3H11A
HSA-1852241	Organelle biogenesis and maintenance	56	287	1.51e-10	ENSP00000202967,ENSP00000215375,ENSP00000217133,ENSP00000248437,ENSP00000253382,ENSP00000262030,ENSP00000264071,ENSP00000264335,ENSP00000264867,ENSP00000268712,ENSP00000277865,ENSP00000280326,ENSP00000281142,ENSP00000286788,ENSP00000295688,ENSP00000297185,ENSP00000299300,ENSP00000301071,ENSP00000301072,ENSP00000302967,ENSP00000306105,ENSP00000309555,ENSP00000311505,ENSP00000317334,ENSP00000320295…	ACSS2,AHI1,ALAS1,ATP5A1,ATP5B,ATP5D,CCT2,CCT3,CCT5,CCT8,CDK1,CEP131,CEP89,CKAP5,CREB1,DYNC1H1,ENSG00000258947,ESRRA,FBF1,GLUD1,HCFC1,HDAC3,HDAC6,HELZ2,HSP90AA1,HSPA9,IDH2,IMMT,IQCB1,MEF2C,NCOR1,NRF1,ODF2,PCM1,PCNT,POLRMT,PPARA,PPARGC1A,PPP2R1A,RPGRIP1L,SCLT1,SIRT3,SIRT4,SIRT5,TBL1XR1,TCP1,TNPO1,TUBA1A,TUBA1C,TUBA4A,TUBB1,TUBB2A,TUBB4A,TUBB8,WDR60,YWHAE
HSA-5663202	Diseases of signal transduction	64	360	1.66e-10	ENSP00000211998,ENSP00000216802,ENSP00000219476,ENSP00000225916,ENSP00000228872,ENSP00000232219,ENSP00000232424,ENSP00000242351,ENSP00000258149,ENSP00000261531,ENSP00000263025,ENSP00000263253,ENSP00000263754,ENSP00000264033,ENSP00000264606,ENSP00000264657,ENSP00000264664,ENSP00000268182,ENSP00000268712,ENSP00000293362,ENSP00000296782,ENSP00000302967,ENSP00000304895,ENSP00000309474,ENSP00000310129…	AKT1,ARRB2,ATG7,CBL,CDKN1B,CREB1,CTNNB1,EP300,ESR1,ESR2,FGF10,FKBP1A,FOXO1,FOXO3,FOXO4,FXR1,HDAC1,HDAC2,HDAC3,HDAC4,HDAC6,HES1,HES5,HEY2,HSP90AA1,IQGAP1,IRS1,IRS2,KAT2A,KAT2B,KSR2,LMNA,MAPK3,MDM2,MTOR,MYC,NCBP1,NCOR1,NF1,PIK3R1,POLR2A,PPP2R1A,PSMC2,PSMC3,PSMC5,PSMC6,PSMD1,PSMD12,PSMD2,PSME2,PSME3,RAP1A,RBP1,RICTOR,SHC1,SND1,SNW1,STAT3,TBL1XR1,TLN1,TSC2,VCL,VCP,ZC3HAV1
HSA-5693532	DNA Double-Strand Break Repair	38	147	3.63e-10	ENSP00000243326,ENSP00000250416,ENSP00000261609,ENSP00000262971,ENSP00000263681,ENSP00000265433,ENSP00000266970,ENSP00000269305,ENSP00000278616,ENSP00000283131,ENSP00000298139,ENSP00000311360,ENSP00000313420,ENSP00000316176,ENSP00000322570,ENSP00000325863,ENSP00000337332,ENSP00000340330,ENSP00000342434,ENSP00000347232,ENSP00000348056,ENSP00000352257,ENSP00000355759,ENSP00000358151,ENSP00000361310…	ATM,BAZ1B,BLM,CDK2,CHEK2,H2AFX,HERC2,HIST1H2BJ,HIST1H2BL,HIST2H2BE,KAT5,KPNA2,MAPK8,MDC1,MRE11A,NBN,PARP1,PARP2,PIAS4,POLD2,POLD3,POLE,POLH,PRKDC,RAD50,RAD9A,RFC1,RIF1,SIRT6,SMARCA5,TP53,TP53BP1,UBE2I,UBE2N,WHSC1,WRN,XRCC5,XRCC6
HSA-69481	G2/M Checkpoints	38	148	4.24e-10	ENSP00000216122,ENSP00000216802,ENSP00000234296,ENSP00000256442,ENSP00000261609,ENSP00000262105,ENSP00000262971,ENSP00000264156,ENSP00000264335,ENSP00000265433,ENSP00000266970,ENSP00000269305,ENSP00000278616,ENSP00000293362,ENSP00000298139,ENSP00000309474,ENSP00000310129,ENSP00000310572,ENSP00000311360,ENSP00000316176,ENSP00000325863,ENSP00000340330,ENSP00000347232,ENSP00000348442,ENSP00000358151…	ATM,BLM,CCNB1,CDK1,CDK2,CHEK2,H2AFX,HERC2,HIST1H2BJ,HIST1H2BL,HIST2H2BE,KAT5,MCM10,MCM4,MCM5,MCM6,MDC1,MRE11A,NBN,ORC2,PIAS4,PSMC2,PSMC3,PSMC5,PSMC6,PSMD1,PSMD12,PSMD2,PSME2,PSME3,RAD50,RAD9A,TP53,TP53BP1,UBE2N,WHSC1,WRN,YWHAE
HSA-9006931	Signaling by Nuclear Receptors	40	167	7.72e-10	ENSP00000001008,ENSP00000205402,ENSP00000218089,ENSP00000227868,ENSP00000252818,ENSP00000254066,ENSP00000263025,ENSP00000263253,ENSP00000263754,ENSP00000265276,ENSP00000280346,ENSP00000297338,ENSP00000306245,ENSP00000307241,ENSP00000323421,ENSP00000329357,ENSP00000332194,ENSP00000335153,ENSP00000340330,ENSP00000343925,ENSP00000354720,ENSP00000358151,ENSP00000360266,ENSP00000362300,ENSP00000362361…	AGO1,CDK9,CHD1,DLAT,DLD,EP300,ESR1,ESR2,FKBP4,FOS,GPAM,GTF2A1,H2AFX,HDAC1,HIST1H2BJ,HIST1H2BL,HIST2H2AC,HIST2H2BE,HSP90AA1,JUN,JUND,KAT2B,KAT5,KDM1A,KPNA2,MAPK3,MOV10,MYC,PDHA1,PDHB,PDHX,PDK1,POLR2A,PRMT1,RAD21,RARA,SMC1A,SMC3,SP1,STAG2
HSA-3232142	SUMOylation of ubiquitinylation proteins	19	34	1.65e-09	ENSP00000229179,ENSP00000231498,ENSP00000249636,ENSP00000254508,ENSP00000256474,ENSP00000258149,ENSP00000261396,ENSP00000262971,ENSP00000268058,ENSP00000283195,ENSP00000285968,ENSP00000310668,ENSP00000348056,ENSP00000352400,ENSP00000356448,ENSP00000361658,ENSP00000367721,ENSP00000444029,ENSP00000458954	MDM2,NUP107,NUP133,NUP153,NUP155,NUP160,NUP188,NUP205,NUP210,NUP214,NUP88,NUP93,PIAS1,PIAS4,PML,RANBP2,TPR,UBE2I,VHL
HSA-72649	Translation initiation complex formation	23	55	1.69e-09	ENSP00000216190,ENSP00000220849,ENSP00000230050,ENSP00000251453,ENSP00000293831,ENSP00000296674,ENSP00000313007,ENSP00000339095,ENSP00000341885,ENSP00000346050,ENSP00000346067,ENSP00000348849,ENSP00000362688,ENSP00000362744,ENSP00000369757,ENSP00000385958,ENSP00000414321,ENSP00000416255,ENSP00000467466,ENSP00000470972,ENSP00000472985,ENSP00000481646,ENSP00000485663	EIF3D,EIF3E,EIF3I,EIF3L,EIF4A1,EIF4G1,PABPC1,RPS10,RPS12,RPS14,RPS15,RPS16,RPS19,RPS2,RPS23,RPS24,RPS26,RPS3A,RPS4X,RPS5,RPS6,RPS7,RPSA
HSA-5250913	Positive epigenetic regulation of rRNA expression	26	73	1.79e-09	ENSP00000225916,ENSP00000263253,ENSP00000263754,ENSP00000263857,ENSP00000278823,ENSP00000283131,ENSP00000332194,ENSP00000333633,ENSP00000333920,ENSP00000335321,ENSP00000336687,ENSP00000342434,ENSP00000346120,ENSP00000349508,ENSP00000357644,ENSP00000358151,ENSP00000362592,ENSP00000362649,ENSP00000364678,ENSP00000366618,ENSP00000369424,ENSP00000369716,ENSP00000370968,ENSP00000430432,ENSP00000434024…	BAZ1B,CBX3,CHD3,CHD4,DDX21,EHMT2,EP300,GATAD2B,H2AFX,HDAC1,HDAC2,HIST1H2BJ,HIST1H2BL,HIST2H2AC,HIST2H2BE,KAT2A,KAT2B,MTA1,MTA2,MYBBP1A,POLR1A,RBBP4,RBBP7,SF3B1,SMARCA5,TTF1
HSA-4615885	SUMOylation of DNA replication proteins	20	40	2.31e-09	ENSP00000216911,ENSP00000229179,ENSP00000231498,ENSP00000254508,ENSP00000261396,ENSP00000262971,ENSP00000283195,ENSP00000285968,ENSP00000310668,ENSP00000348056,ENSP00000352400,ENSP00000354522,ENSP00000356448,ENSP00000361658,ENSP00000367721,ENSP00000376765,ENSP00000378295,ENSP00000401470,ENSP00000444029,ENSP00000458954	AURKA,INCENP,NUP107,NUP133,NUP153,NUP155,NUP160,NUP188,NUP205,NUP210,NUP214,NUP88,NUP93,PIAS3,PIAS4,RANBP2,RANGAP1,TOP1,TPR,UBE2I
HSA-1169408	ISG15 antiviral mechanism	25	69	2.93e-09	ENSP00000229179,ENSP00000231498,ENSP00000254508,ENSP00000261396,ENSP00000261667,ENSP00000263025,ENSP00000264350,ENSP00000283195,ENSP00000285968,ENSP00000290158,ENSP00000293831,ENSP00000310668,ENSP00000316176,ENSP00000323889,ENSP00000343204,ENSP00000352400,ENSP00000356448,ENSP00000361658,ENSP00000367721,ENSP00000383274,ENSP00000416255,ENSP00000420213,ENSP00000438483,ENSP00000444029,ENSP00000458954	EIF4A1,EIF4G1,EIF4G3,FLNB,HERC5,JAK1,KPNA2,KPNA3,KPNB1,MAPK3,NUP107,NUP133,NUP153,NUP155,NUP160,NUP188,NUP205,NUP210,NUP214,NUP88,NUP93,RANBP2,TPR,TRIM25,UBE2N
HSA-5688426	Deubiquitination	52	279	3.07e-09	ENSP00000216802,ENSP00000218348,ENSP00000225916,ENSP00000229268,ENSP00000230085,ENSP00000250495,ENSP00000258149,ENSP00000258399,ENSP00000259808,ENSP00000261497,ENSP00000262158,ENSP00000263253,ENSP00000263754,ENSP00000265333,ENSP00000265986,ENSP00000269305,ENSP00000274255,ENSP00000293362,ENSP00000294383,ENSP00000308022,ENSP00000309262,ENSP00000309474,ENSP00000309555,ENSP00000310129,ENSP00000310572…	AR,ARRB2,CDC20,CDK1,EP300,ESR1,FOXO4,HCFC1,HIF1A,HIST1H2BJ,HIST1H2BL,HIST2H2AB,HIST2H2AC,HIST2H2BE,IDE,KAT2A,KAT2B,MDM2,MYC,NEDD8,PSMC2,PSMC3,PSMC5,PSMC6,PSMD1,PSMD12,PSMD2,PSME2,PSME3,RIPK1,RUVBL1,SKP2,SMAD7,SNX3,TADA2B,TP53,TRIM25,TRRAP,UBE2D1,USP10,USP11,USP22,USP24,USP34,USP37,USP47,USP48,USP5,USP7,USP9X,VCP,VDAC1
HSA-5689880	Ub-specific processing proteases	43	202	3.35e-09	ENSP00000216802,ENSP00000218348,ENSP00000225916,ENSP00000229268,ENSP00000230085,ENSP00000258149,ENSP00000258399,ENSP00000259808,ENSP00000261497,ENSP00000262158,ENSP00000265333,ENSP00000265986,ENSP00000269305,ENSP00000274255,ENSP00000293362,ENSP00000294383,ENSP00000308022,ENSP00000309262,ENSP00000309474,ENSP00000310129,ENSP00000310572,ENSP00000316357,ENSP00000318297,ENSP00000332194,ENSP00000332790…	AR,ARRB2,CDC20,FOXO4,HIF1A,HIST1H2BJ,HIST1H2BL,HIST2H2AB,HIST2H2AC,HIST2H2BE,IDE,KAT2A,MDM2,MYC,PSMC2,PSMC3,PSMC5,PSMC6,PSMD1,PSMD12,PSMD2,PSME2,PSME3,RIPK1,RUVBL1,SKP2,SMAD7,SNX3,TADA2B,TP53,TRRAP,USP10,USP11,USP22,USP24,USP34,USP37,USP47,USP48,USP5,USP7,USP9X,VDAC1
HSA-8939211	ESR-mediated signaling	33	124	3.49e-09	ENSP00000001008,ENSP00000218089,ENSP00000252818,ENSP00000263025,ENSP00000263253,ENSP00000263754,ENSP00000265276,ENSP00000297338,ENSP00000306245,ENSP00000323421,ENSP00000329357,ENSP00000332194,ENSP00000335153,ENSP00000340330,ENSP00000343925,ENSP00000354720,ENSP00000358151,ENSP00000360266,ENSP00000362300,ENSP00000362361,ENSP00000362649,ENSP00000366618,ENSP00000383042,ENSP00000399797,ENSP00000405330…	AGO1,CDK9,CHD1,EP300,ESR1,ESR2,FKBP4,FOS,GPAM,GTF2A1,H2AFX,HDAC1,HIST1H2BJ,HIST1H2BL,HIST2H2AC,HIST2H2BE,HSP90AA1,JUN,JUND,KAT2B,KAT5,KDM1A,KPNA2,MAPK3,MOV10,MYC,POLR2A,PRMT1,RAD21,SMC1A,SMC3,SP1,STAG2
HSA-159231	Transport of Mature mRNA Derived from an Intronless Transcript	19	37	4.43e-09	ENSP00000229179,ENSP00000231498,ENSP00000238112,ENSP00000245934,ENSP00000254508,ENSP00000261396,ENSP00000283195,ENSP00000285968,ENSP00000310668,ENSP00000352400,ENSP00000356448,ENSP00000361658,ENSP00000364289,ENSP00000367721,ENSP00000421592,ENSP00000436679,ENSP00000444029,ENSP00000458954,ENSP00000484669	ALYREF,CPSF1,CPSF3,NCBP1,NUP107,NUP133,NUP153,NUP155,NUP160,NUP188,NUP205,NUP210,NUP214,NUP88,NUP93,NXF1,RANBP2,SYMPK,TPR
HSA-157118	Signaling by NOTCH	42	197	5.04e-09	ENSP00000216802,ENSP00000225916,ENSP00000232424,ENSP00000261531,ENSP00000263253,ENSP00000263754,ENSP00000264606,ENSP00000268712,ENSP00000269305,ENSP00000293362,ENSP00000302967,ENSP00000309474,ENSP00000310129,ENSP00000310572,ENSP00000332194,ENSP00000334061,ENSP00000337332,ENSP00000345571,ENSP00000348442,ENSP00000357348,ENSP00000358151,ENSP00000360266,ENSP00000361626,ENSP00000362300,ENSP00000362649…	AGO1,AKT1,ARRB2,ATP2A2,CREB1,E2F1,EP300,H2AFX,HDAC1,HDAC2,HDAC3,HDAC4,HDAC6,HES1,HES5,HEY2,HIF1A,HIST1H2BJ,HIST1H2BL,HIST2H2AC,HIST2H2BE,JUN,KAT2A,KAT2B,MOV10,MYC,NCOR1,PSMC2,PSMC3,PSMC5,PSMC6,PSMD1,PSMD12,PSMD2,PSME2,PSME3,SIRT6,SNW1,TBL1XR1,TLE1,TP53,YBX1
HSA-1280215	Cytokine Signaling in Immune system	89	654	5.28e-09	ENSP00000216802,ENSP00000226574,ENSP00000229179,ENSP00000231498,ENSP00000247461,ENSP00000249636,ENSP00000254508,ENSP00000257570,ENSP00000261396,ENSP00000261667,ENSP00000262640,ENSP00000263025,ENSP00000263168,ENSP00000263708,ENSP00000264033,ENSP00000264350,ENSP00000264657,ENSP00000268058,ENSP00000269305,ENSP00000283195,ENSP00000284981,ENSP00000285968,ENSP00000290158,ENSP00000293362,ENSP00000293831…	ABCE1,AKT1,ANXA1,ANXA2,APP,BCL6,BTRC,CANX,CAPZA1,CBL,CIITA,CREB1,EIF4A1,EIF4G1,EIF4G3,FLNA,FLNB,FOS,FOXO1,FOXO3,FSCN1,GBP6,HERC5,HIF1A,HNRNPF,HSP90AA1,HSP90B1,HSPA8,HSPA9,IRS1,IRS2,JAK1,JUN,KPNA2,KPNA3,KPNB1,LCP1,MAP2K4,MAPK3,MAPK8,MEF2C,MSN,MYC,NDN,NFKB1,NUP107,NUP133,NUP153,NUP155,NUP160,NUP188,NUP205,NUP210,NUP214,NUP88,NUP93,OASL,P4HB,PDE12,PIAS1,PIK3R1,PITPNA,PML,PPP2R1A,PSMC2,PSMC3,PSMC5,PS…
HSA-453274	Mitotic G2-G2/M phases	41	191	6.63e-09	ENSP00000216802,ENSP00000216911,ENSP00000217133,ENSP00000248437,ENSP00000256442,ENSP00000261245,ENSP00000263253,ENSP00000264071,ENSP00000264335,ENSP00000266970,ENSP00000269305,ENSP00000293362,ENSP00000301071,ENSP00000301072,ENSP00000309474,ENSP00000310129,ENSP00000310572,ENSP00000320295,ENSP00000324804,ENSP00000327077,ENSP00000335153,ENSP00000342307,ENSP00000345571,ENSP00000348442,ENSP00000348965…	AURKA,BTRC,CCNB1,CDK1,CDK2,CENPF,CEP131,CKAP5,DYNC1H1,E2F1,ENSG00000258947,EP300,FKBPL,FOXM1,HSP90AA1,MNAT1,ODF2,PCM1,PCNT,PPP1CB,PPP2R1A,PSMC2,PSMC3,PSMC5,PSMC6,PSMD1,PSMD12,PSMD2,PSME2,PSME3,RBBP4,TP53,TUBA1A,TUBA1C,TUBA4A,TUBB1,TUBB2A,TUBB4A,TUBB8,XPO1,YWHAE
HSA-162909	Host Interactions of HIV factors	32	121	6.98e-09	ENSP00000216802,ENSP00000229179,ENSP00000231498,ENSP00000254508,ENSP00000261396,ENSP00000283195,ENSP00000285968,ENSP00000290158,ENSP00000293362,ENSP00000296930,ENSP00000309474,ENSP00000310129,ENSP00000310572,ENSP00000310668,ENSP00000348442,ENSP00000350199,ENSP00000352400,ENSP00000356448,ENSP00000359206,ENSP00000360671,ENSP00000361658,ENSP00000362361,ENSP00000367721,ENSP00000370808,ENSP00000384863…	AP1B1,AP2B1,BTRC,CDK9,KPNB1,NPM1,NUP107,NUP133,NUP153,NUP155,NUP160,NUP188,NUP205,NUP210,NUP214,NUP88,NUP93,PSMC2,PSMC3,PSMC5,PSMC6,PSMD1,PSMD12,PSMD2,PSME2,PSME3,RANBP2,RANGAP1,SLC25A5,SLC25A6,TPR,XPO1
HSA-72702	Ribosomal scanning and start codon recognition	22	55	7.18e-09	ENSP00000216190,ENSP00000220849,ENSP00000230050,ENSP00000251453,ENSP00000293831,ENSP00000296674,ENSP00000339095,ENSP00000341885,ENSP00000346050,ENSP00000346067,ENSP00000348849,ENSP00000362688,ENSP00000362744,ENSP00000369757,ENSP00000385958,ENSP00000414321,ENSP00000416255,ENSP00000467466,ENSP00000470972,ENSP00000472985,ENSP00000481646,ENSP00000485663	EIF3D,EIF3E,EIF3I,EIF3L,EIF4A1,EIF4G1,RPS10,RPS12,RPS14,RPS15,RPS16,RPS19,RPS2,RPS23,RPS24,RPS26,RPS3A,RPS4X,RPS5,RPS6,RPS7,RPSA
HSA-168256	Immune System	195	1925	8.59e-09	ENSP00000053867,ENSP00000211998,ENSP00000216181,ENSP00000216274,ENSP00000216392,ENSP00000216802,ENSP00000216962,ENSP00000217133,ENSP00000219548,ENSP00000226574,ENSP00000228740,ENSP00000229179,ENSP00000231498,ENSP00000231751,ENSP00000247461,ENSP00000248437,ENSP00000249636,ENSP00000249923,ENSP00000253792,ENSP00000254508,ENSP00000256474,ENSP00000257570,ENSP00000259808,ENSP00000260363,ENSP00000260983…	ABCE1,ACLY,ACTR2,ACTR3,AKT1,ANAPC1,ANAPC7,ANXA1,ANXA2,AP1B1,AP2B1,APP,ATG5,ATG7,BCL6,BTRC,CALR,CANX,CAP1,CAPN1,CAPZA1,CAPZB,CBL,CBLB,CCT2,CCT8,CDC20,CDC23,CDC27,CIITA,CLTC,COPB1,CREB1,CSNK2B,CTNNB1,CUL7,DEGS1,DHX36,DNM2,DSP,DYNC1H1,EEF1A1,EEF2,EIF4A1,EIF4G1,EIF4G3,ENSG00000258947,EP300,FBXO7,FKBP1A,FLNA,FLNB,FOS,FOXO1,FOXO3,FSCN1,FZR1,GBP6,GDI2,GRN,GSTP1,HECTD1,HECW2,HERC2,HERC5,HIF1A,HNRNPF,HSP9…
HSA-4551638	SUMOylation of chromatin organization proteins	21	51	1.14e-08	ENSP00000229179,ENSP00000231498,ENSP00000249636,ENSP00000254508,ENSP00000261396,ENSP00000264606,ENSP00000283195,ENSP00000285968,ENSP00000310668,ENSP00000316578,ENSP00000348056,ENSP00000352400,ENSP00000356448,ENSP00000361658,ENSP00000362649,ENSP00000367721,ENSP00000369716,ENSP00000399518,ENSP00000430432,ENSP00000444029,ENSP00000458954	CHD3,HDAC1,HDAC2,HDAC4,NUP107,NUP133,NUP153,NUP155,NUP160,NUP188,NUP205,NUP210,NUP214,NUP88,NUP93,PIAS1,RANBP2,SATB1,SUZ12,TPR,UBE2I
HSA-9018519	Estrogen-dependent gene expression	31	118	1.43e-08	ENSP00000001008,ENSP00000218089,ENSP00000252818,ENSP00000263253,ENSP00000263754,ENSP00000265276,ENSP00000297338,ENSP00000306245,ENSP00000323421,ENSP00000329357,ENSP00000332194,ENSP00000335153,ENSP00000340330,ENSP00000354720,ENSP00000358151,ENSP00000360266,ENSP00000362300,ENSP00000362361,ENSP00000362649,ENSP00000366618,ENSP00000383042,ENSP00000399797,ENSP00000405330,ENSP00000406162,ENSP00000434024…	AGO1,CDK9,CHD1,EP300,ESR1,FKBP4,FOS,GPAM,GTF2A1,H2AFX,HDAC1,HIST1H2BJ,HIST1H2BL,HIST2H2AC,HIST2H2BE,HSP90AA1,JUN,JUND,KAT2B,KAT5,KDM1A,KPNA2,MOV10,MYC,POLR2A,PRMT1,RAD21,SMC1A,SMC3,SP1,STAG2
HSA-69275	G2/M Transition	40	189	1.45e-08	ENSP00000216802,ENSP00000216911,ENSP00000217133,ENSP00000248437,ENSP00000256442,ENSP00000261245,ENSP00000263253,ENSP00000264071,ENSP00000264335,ENSP00000266970,ENSP00000269305,ENSP00000293362,ENSP00000301071,ENSP00000301072,ENSP00000309474,ENSP00000310129,ENSP00000310572,ENSP00000320295,ENSP00000324804,ENSP00000327077,ENSP00000335153,ENSP00000342307,ENSP00000348442,ENSP00000348965,ENSP00000352572…	AURKA,BTRC,CCNB1,CDK1,CDK2,CENPF,CEP131,CKAP5,DYNC1H1,ENSG00000258947,EP300,FKBPL,FOXM1,HSP90AA1,MNAT1,ODF2,PCM1,PCNT,PPP1CB,PPP2R1A,PSMC2,PSMC3,PSMC5,PSMC6,PSMD1,PSMD12,PSMD2,PSME2,PSME3,RBBP4,TP53,TUBA1A,TUBA1C,TUBA4A,TUBB1,TUBB2A,TUBB4A,TUBB8,XPO1,YWHAE
HSA-5357801	Programmed Cell Death	37	165	1.55e-08	ENSP00000216274,ENSP00000216802,ENSP00000244534,ENSP00000244573,ENSP00000259808,ENSP00000262710,ENSP00000264335,ENSP00000264657,ENSP00000264731,ENSP00000269305,ENSP00000281537,ENSP00000290158,ENSP00000293362,ENSP00000307705,ENSP00000309474,ENSP00000310129,ENSP00000310572,ENSP00000323856,ENSP00000330074,ENSP00000340820,ENSP00000344456,ENSP00000345571,ENSP00000348442,ENSP00000354681,ENSP00000361824…	ACIN1,AKT1,CTNNB1,DNM1L,DSP,E2F1,HIST1H1A,HIST1H1B,HIST1H1D,HIST1H1E,KPNB1,MAGED1,MAPK8,MAPT,OPA1,PLEC,PSMC2,PSMC3,PSMC5,PSMC6,PSMD1,PSMD12,PSMD2,PSME2,PSME3,RIPK1,RIPK3,SATB1,SPTAN1,STAT3,TJP1,TJP2,TP53,TP63,TP73,VIM,YWHAE
HSA-8943724	Regulation of PTEN gene transcription	22	59	1.95e-08	ENSP00000244050,ENSP00000263025,ENSP00000263360,ENSP00000264674,ENSP00000269305,ENSP00000278823,ENSP00000287820,ENSP00000302967,ENSP00000307272,ENSP00000316578,ENSP00000320147,ENSP00000333633,ENSP00000349508,ENSP00000354558,ENSP00000357644,ENSP00000360266,ENSP00000362592,ENSP00000362649,ENSP00000369424,ENSP00000369716,ENSP00000383042,ENSP00000430432	CHD3,CHD4,EED,EZH2,GATAD2B,HDAC1,HDAC2,HDAC3,JUN,KDM1A,MAPK3,MECOM,MTA1,MTA2,MTOR,PPARG,RBBP4,RBBP7,RPTOR,SNAI1,SUZ12,TP53
HSA-69206	G1/S Transition	32	128	2.1e-08	ENSP00000216122,ENSP00000216802,ENSP00000228872,ENSP00000234296,ENSP00000256442,ENSP00000261245,ENSP00000262105,ENSP00000262133,ENSP00000264156,ENSP00000266970,ENSP00000267163,ENSP00000274255,ENSP00000293362,ENSP00000309474,ENSP00000310129,ENSP00000310572,ENSP00000322570,ENSP00000324804,ENSP00000345571,ENSP00000348442,ENSP00000351490,ENSP00000362592,ENSP00000362649,ENSP00000362768,ENSP00000368349…	AKT1,CCNB1,CDK1,CDK2,CDKN1B,E2F1,HDAC1,MAX,MCM10,MCM4,MCM5,MCM6,MNAT1,MYC,ORC2,POLA1,POLE,PPP2R1A,PSMC2,PSMC3,PSMC5,PSMC6,PSMD1,PSMD12,PSMD2,PSME2,PSME3,RB1,RBBP4,RBL1,RBL2,SKP2
HSA-5693606	DNA Double Strand Break Response	22	60	2.47e-08	ENSP00000261609,ENSP00000262971,ENSP00000265433,ENSP00000269305,ENSP00000278616,ENSP00000283131,ENSP00000316176,ENSP00000325863,ENSP00000340330,ENSP00000342434,ENSP00000348056,ENSP00000358151,ENSP00000365588,ENSP00000366618,ENSP00000368100,ENSP00000371475,ENSP00000372023,ENSP00000372351,ENSP00000378974,ENSP00000434024,ENSP00000438483,ENSP00000476136	ATM,BAZ1B,CHEK2,H2AFX,HERC2,HIST1H2BJ,HIST1H2BL,HIST2H2BE,KAT5,KPNA2,MAPK8,MDC1,MRE11A,NBN,PIAS4,RAD50,SMARCA5,TP53,TP53BP1,UBE2I,UBE2N,WHSC1
HSA-453279	Mitotic G1-G1/S phases	34	145	2.64e-08	ENSP00000216122,ENSP00000216802,ENSP00000228872,ENSP00000234296,ENSP00000256442,ENSP00000261245,ENSP00000262105,ENSP00000262133,ENSP00000264156,ENSP00000265734,ENSP00000266970,ENSP00000267163,ENSP00000274255,ENSP00000293362,ENSP00000309474,ENSP00000310129,ENSP00000310572,ENSP00000322570,ENSP00000324804,ENSP00000345571,ENSP00000348442,ENSP00000351490,ENSP00000362592,ENSP00000362649,ENSP00000362768…	AKT1,CCNB1,CDK1,CDK2,CDK6,CDKN1B,DYRK1A,E2F1,HDAC1,MAX,MCM10,MCM4,MCM5,MCM6,MNAT1,MYC,ORC2,POLA1,POLE,PPP2R1A,PSMC2,PSMC3,PSMC5,PSMC6,PSMD1,PSMD12,PSMD2,PSME2,PSME3,RB1,RBBP4,RBL1,RBL2,SKP2
HSA-72695	Formation of the ternary complex, and subsequently, the 43S complex	20	49	3e-08	ENSP00000216190,ENSP00000220849,ENSP00000230050,ENSP00000251453,ENSP00000296674,ENSP00000339095,ENSP00000341885,ENSP00000346050,ENSP00000346067,ENSP00000348849,ENSP00000362688,ENSP00000362744,ENSP00000369757,ENSP00000385958,ENSP00000414321,ENSP00000467466,ENSP00000470972,ENSP00000472985,ENSP00000481646,ENSP00000485663	EIF3D,EIF3E,EIF3I,EIF3L,RPS10,RPS12,RPS14,RPS15,RPS16,RPS19,RPS2,RPS23,RPS24,RPS26,RPS3A,RPS4X,RPS5,RPS6,RPS7,RPSA
HSA-109581	Apoptosis	36	162	3.01e-08	ENSP00000216802,ENSP00000244534,ENSP00000244573,ENSP00000259808,ENSP00000262710,ENSP00000264335,ENSP00000264657,ENSP00000264731,ENSP00000269305,ENSP00000281537,ENSP00000290158,ENSP00000293362,ENSP00000307705,ENSP00000309474,ENSP00000310129,ENSP00000310572,ENSP00000323856,ENSP00000330074,ENSP00000340820,ENSP00000344456,ENSP00000345571,ENSP00000348442,ENSP00000354681,ENSP00000361824,ENSP00000364847…	ACIN1,AKT1,CTNNB1,DNM1L,DSP,E2F1,HIST1H1A,HIST1H1B,HIST1H1D,HIST1H1E,KPNB1,MAGED1,MAPK8,MAPT,OPA1,PLEC,PSMC2,PSMC3,PSMC5,PSMC6,PSMD1,PSMD12,PSMD2,PSME2,PSME3,RIPK1,SATB1,SPTAN1,STAT3,TJP1,TJP2,TP53,TP63,TP73,VIM,YWHAE
HSA-177243	Interactions of Rev with host cellular proteins	17	33	3.07e-08	ENSP00000229179,ENSP00000231498,ENSP00000254508,ENSP00000261396,ENSP00000283195,ENSP00000285968,ENSP00000290158,ENSP00000296930,ENSP00000310668,ENSP00000352400,ENSP00000356448,ENSP00000361658,ENSP00000367721,ENSP00000384863,ENSP00000401470,ENSP00000444029,ENSP00000458954	KPNB1,NPM1,NUP107,NUP133,NUP153,NUP155,NUP160,NUP188,NUP205,NUP210,NUP214,NUP88,NUP93,RANBP2,RANGAP1,TPR,XPO1
HSA-194315	Signaling by Rho GTPases	62	402	3.72e-08	ENSP00000005340,ENSP00000216181,ENSP00000217133,ENSP00000228872,ENSP00000229179,ENSP00000248437,ENSP00000260526,ENSP00000261396,ENSP00000263025,ENSP00000263238,ENSP00000264071,ENSP00000264335,ENSP00000265295,ENSP00000268182,ENSP00000269321,ENSP00000283195,ENSP00000287598,ENSP00000301071,ENSP00000301072,ENSP00000304669,ENSP00000307078,ENSP00000316054,ENSP00000320295,ENSP00000324804,ENSP00000332194…	ACTR2,ACTR3,AHCTF1,AR,ARHGAP22,ARHGAP29,ARHGDIA,ARHGEF26,BUB1B,CDC20,CDKN1B,CENPA,CENPF,CKAP5,CTNNA1,CTNNB1,DIAPH3,DVL1,DVL2,DVL3,DYNC1H1,ECT2,ENSG00000258947,FLNA,GDI1,GDI2,H2AFX,HIST1H2BJ,HIST1H2BL,HIST2H2AC,HIST2H2BE,INCENP,IQGAP1,IQGAP3,KDM1A,KIF14,KIF5B,MAPK3,MYH10,MYH14,MYH9,NCKAP1,NUP107,NUP133,NUP160,PPP1CB,PPP1CC,PPP2R1A,RANBP2,RANGAP1,RCC2,SEC13,SPDL1,TUBA1A,TUBA1C,TUBA4A,TUBB1,TUBB2A,T…
HSA-162906	HIV Infection	43	224	4.16e-08	ENSP00000216802,ENSP00000229179,ENSP00000231498,ENSP00000254508,ENSP00000261245,ENSP00000261396,ENSP00000262809,ENSP00000283195,ENSP00000285968,ENSP00000290158,ENSP00000293362,ENSP00000296930,ENSP00000309474,ENSP00000310129,ENSP00000310572,ENSP00000310668,ENSP00000348442,ENSP00000350199,ENSP00000352257,ENSP00000352400,ENSP00000356448,ENSP00000359206,ENSP00000360671,ENSP00000361658,ENSP00000362361…	AP1B1,AP2B1,BTRC,CDK9,ELL,GTF2A1,KPNB1,MNAT1,NCBP1,NPM1,NUP107,NUP133,NUP153,NUP155,NUP160,NUP188,NUP205,NUP210,NUP214,NUP88,NUP93,PDCD6IP,POLR2A,PSMC2,PSMC3,PSMC5,PSMC6,PSMD1,PSMD12,PSMD2,PSME2,PSME3,RANBP2,RANGAP1,SLC25A5,SLC25A6,SUPT5H,TAF15,TAF2,TPR,XPO1,XRCC5,XRCC6
HSA-159227	Transport of the SLBP independent Mature mRNA	16	30	6e-08	ENSP00000229179,ENSP00000231498,ENSP00000254508,ENSP00000261396,ENSP00000283195,ENSP00000285968,ENSP00000310668,ENSP00000352400,ENSP00000356448,ENSP00000361658,ENSP00000364289,ENSP00000367721,ENSP00000421592,ENSP00000436679,ENSP00000444029,ENSP00000458954	ALYREF,NCBP1,NUP107,NUP133,NUP153,NUP155,NUP160,NUP188,NUP205,NUP210,NUP214,NUP88,NUP93,NXF1,RANBP2,TPR
HSA-8878171	Transcriptional regulation by RUNX1	40	201	6e-08	ENSP00000216802,ENSP00000217244,ENSP00000254480,ENSP00000261245,ENSP00000262506,ENSP00000263253,ENSP00000263754,ENSP00000265276,ENSP00000265734,ENSP00000265773,ENSP00000267064,ENSP00000268058,ENSP00000281537,ENSP00000293362,ENSP00000309474,ENSP00000310129,ENSP00000310572,ENSP00000320485,ENSP00000332194,ENSP00000348442,ENSP00000358151,ENSP00000362300,ENSP00000362649,ENSP00000365042,ENSP00000365380…	AGO1,ARID1A,CDK6,CSNK2A1,CSNK2A2,CSNK2B,EP300,ESR1,FOXP3,GPAM,H2AFX,HDAC1,HIPK2,HIST1H2BJ,HIST1H2BL,HIST2H2AC,HIST2H2BE,KAT2B,KMT2A,MNAT1,MOV10,PBRM1,PML,PRMT1,PSMC2,PSMC3,PSMC5,PSMC6,PSMD1,PSMD12,PSMD2,PSME2,PSME3,SMARCA2,SMARCA4,SMARCC1,SMARCC2,SMARCD2,TJP1,TP73
HSA-5693565	Recruitment and ATM-mediated phosphorylation of repair and signaling proteins at DNA double strand breaks	21	59	8.11e-08	ENSP00000261609,ENSP00000262971,ENSP00000265433,ENSP00000269305,ENSP00000278616,ENSP00000283131,ENSP00000316176,ENSP00000325863,ENSP00000340330,ENSP00000342434,ENSP00000348056,ENSP00000358151,ENSP00000365588,ENSP00000366618,ENSP00000368100,ENSP00000371475,ENSP00000372023,ENSP00000372351,ENSP00000378974,ENSP00000434024,ENSP00000476136	ATM,BAZ1B,CHEK2,H2AFX,HERC2,HIST1H2BJ,HIST1H2BL,HIST2H2BE,KAT5,MAPK8,MDC1,MRE11A,NBN,PIAS4,RAD50,SMARCA5,TP53,TP53BP1,UBE2I,UBE2N,WHSC1
HSA-2151201	Transcriptional activation of mitochondrial biogenesis	20	53	8.21e-08	ENSP00000202967,ENSP00000253382,ENSP00000262030,ENSP00000264867,ENSP00000268712,ENSP00000277865,ENSP00000302967,ENSP00000309555,ENSP00000331897,ENSP00000340874,ENSP00000372191,ENSP00000376924,ENSP00000378416,ENSP00000384851,ENSP00000385523,ENSP00000387699,ENSP00000405574,ENSP00000417401,ENSP00000465759,ENSP00000476228	ACSS2,ALAS1,ATP5B,CREB1,ESRRA,GLUD1,HCFC1,HDAC3,HELZ2,IDH2,MEF2C,NCOR1,NRF1,POLRMT,PPARA,PPARGC1A,SIRT3,SIRT4,SIRT5,TBL1XR1
HSA-159230	Transport of the SLBP Dependant Mature mRNA	16	31	8.33e-08	ENSP00000229179,ENSP00000231498,ENSP00000254508,ENSP00000261396,ENSP00000283195,ENSP00000285968,ENSP00000310668,ENSP00000352400,ENSP00000356448,ENSP00000361658,ENSP00000364289,ENSP00000367721,ENSP00000421592,ENSP00000436679,ENSP00000444029,ENSP00000458954	ALYREF,NCBP1,NUP107,NUP133,NUP153,NUP155,NUP160,NUP188,NUP205,NUP210,NUP214,NUP88,NUP93,NXF1,RANBP2,TPR
HSA-5663220	RHO GTPases Activate Formins	31	131	1.01e-07	ENSP00000005340,ENSP00000217133,ENSP00000229179,ENSP00000248437,ENSP00000261396,ENSP00000264071,ENSP00000265295,ENSP00000283195,ENSP00000287598,ENSP00000301071,ENSP00000301072,ENSP00000316054,ENSP00000320295,ENSP00000324804,ENSP00000336868,ENSP00000341779,ENSP00000348965,ENSP00000355465,ENSP00000355922,ENSP00000361540,ENSP00000364585,ENSP00000367721,ENSP00000368169,ENSP00000369703,ENSP00000373312…	AHCTF1,BUB1B,CDC20,CENPA,CENPF,CKAP5,DIAPH3,DVL1,DVL2,DVL3,DYNC1H1,ENSG00000258947,INCENP,NUP107,NUP133,NUP160,PPP1CC,PPP2R1A,RANBP2,RANGAP1,RCC2,SEC13,SPDL1,TUBA1A,TUBA1C,TUBA4A,TUBB1,TUBB2A,TUBB4A,TUBB8,XPO1
HSA-191859	snRNP Assembly	19	49	1.33e-07	ENSP00000229179,ENSP00000231498,ENSP00000235090,ENSP00000254508,ENSP00000261396,ENSP00000283195,ENSP00000285873,ENSP00000285968,ENSP00000310668,ENSP00000319169,ENSP00000321706,ENSP00000352400,ENSP00000356448,ENSP00000358716,ENSP00000361658,ENSP00000364289,ENSP00000367721,ENSP00000444029,ENSP00000458954	DDX20,GEMIN4,GEMIN5,NCBP1,NUP107,NUP133,NUP153,NUP155,NUP160,NUP188,NUP205,NUP210,NUP214,NUP88,NUP93,PRMT5,RANBP2,TPR,WDR77
HSA-174143	APC/C-mediated degradation of cell cycle proteins	24	82	1.58e-07	ENSP00000216802,ENSP00000216911,ENSP00000256442,ENSP00000266970,ENSP00000274255,ENSP00000287598,ENSP00000293362,ENSP00000309474,ENSP00000310129,ENSP00000310572,ENSP00000339109,ENSP00000348442,ENSP00000359206,ENSP00000361540,ENSP00000363019,ENSP00000378350,ENSP00000378529,ENSP00000378699,ENSP00000391211,ENSP00000394394,ENSP00000401802,ENSP00000434614,ENSP00000439403,ENSP00000481029	ANAPC1,ANAPC15,ANAPC7,AURKA,BTRC,BUB1B,CCNB1,CDC20,CDC23,CDC27,CDK1,CDK2,FZR1,PSMC2,PSMC3,PSMC5,PSMC6,PSMD1,PSMD12,PSMD2,PSME2,PSME3,SKP2,UBE2D1
HSA-168253	Host Interactions with Influenza Factors	17	39	1.92e-07	ENSP00000229179,ENSP00000231498,ENSP00000254508,ENSP00000261396,ENSP00000261667,ENSP00000283195,ENSP00000285968,ENSP00000290158,ENSP00000310668,ENSP00000352400,ENSP00000356448,ENSP00000361658,ENSP00000367721,ENSP00000370808,ENSP00000438483,ENSP00000444029,ENSP00000458954	KPNA2,KPNA3,KPNB1,NUP107,NUP133,NUP153,NUP155,NUP160,NUP188,NUP205,NUP210,NUP214,NUP88,NUP93,RANBP2,SLC25A6,TPR
HSA-168274	Export of Viral Ribonucleoproteins from Nucleus	15	29	2.27e-07	ENSP00000229179,ENSP00000231498,ENSP00000254508,ENSP00000261396,ENSP00000283195,ENSP00000285968,ENSP00000310668,ENSP00000352400,ENSP00000356448,ENSP00000361658,ENSP00000364802,ENSP00000367721,ENSP00000384863,ENSP00000444029,ENSP00000458954	HSPA1A,NUP107,NUP133,NUP153,NUP155,NUP160,NUP188,NUP205,NUP210,NUP214,NUP88,NUP93,RANBP2,TPR,XPO1
HSA-170834	Signaling by TGF-beta Receptor Complex	22	71	2.61e-07	ENSP00000219255,ENSP00000219548,ENSP00000250495,ENSP00000261531,ENSP00000262158,ENSP00000264033,ENSP00000268712,ENSP00000271636,ENSP00000316357,ENSP00000326031,ENSP00000329357,ENSP00000341779,ENSP00000355759,ENSP00000362361,ENSP00000362649,ENSP00000362768,ENSP00000363019,ENSP00000367797,ENSP00000378769,ENSP00000383003,ENSP00000384863,ENSP00000479618	CBL,CDK9,CGN,FKBP1A,HDAC1,MYC,NCOR1,NEDD8,PARD6A,PARP1,PPP1CA,PPP1CB,PPP1CC,RBL1,SKI,SMAD7,SNW1,SP1,STUB1,UBE2D1,USP9X,XPO1
HSA-69306	DNA Replication	29	122	2.61e-07	ENSP00000216122,ENSP00000216802,ENSP00000234296,ENSP00000262105,ENSP00000263681,ENSP00000264156,ENSP00000266970,ENSP00000274255,ENSP00000293362,ENSP00000309474,ENSP00000310129,ENSP00000310572,ENSP00000322570,ENSP00000339109,ENSP00000345571,ENSP00000348442,ENSP00000363019,ENSP00000368349,ENSP00000371321,ENSP00000378350,ENSP00000378529,ENSP00000391211,ENSP00000394394,ENSP00000401802,ENSP00000418268…	ANAPC1,ANAPC15,ANAPC7,CDC23,CDC27,CDK2,E2F1,FZR1,MCM10,MCM4,MCM5,MCM6,ORC2,POLA1,POLD2,POLD3,POLE,PSMC2,PSMC3,PSMC5,PSMC6,PSMD1,PSMD12,PSMD2,PSME2,PSME3,RFC1,SKP2,UBE2D1
HSA-2559582	Senescence-Associated Secretory Phenotype (SASP)	23	78	2.68e-07	ENSP00000226574,ENSP00000228872,ENSP00000263025,ENSP00000264657,ENSP00000265734,ENSP00000266970,ENSP00000306245,ENSP00000332194,ENSP00000339109,ENSP00000358151,ENSP00000360266,ENSP00000363019,ENSP00000364678,ENSP00000366618,ENSP00000378350,ENSP00000378529,ENSP00000384273,ENSP00000394394,ENSP00000417980,ENSP00000434024,ENSP00000434614,ENSP00000439403,ENSP00000476136	ANAPC1,ANAPC15,ANAPC7,CDC23,CDC27,CDK2,CDK6,CDKN1B,EHMT1,EHMT2,FOS,FZR1,H2AFX,HIST1H2BJ,HIST1H2BL,HIST2H2AC,HIST2H2BE,JUN,MAPK3,NFKB1,RELA,STAT3,UBE2D1
HSA-5693571	Nonhomologous End-Joining (NHEJ)	19	52	2.68e-07	ENSP00000243326,ENSP00000261609,ENSP00000262971,ENSP00000265433,ENSP00000278616,ENSP00000313420,ENSP00000316176,ENSP00000325863,ENSP00000340330,ENSP00000352257,ENSP00000358151,ENSP00000365588,ENSP00000366618,ENSP00000368100,ENSP00000371475,ENSP00000372351,ENSP00000375978,ENSP00000434024,ENSP00000476136	ATM,H2AFX,HERC2,HIST1H2BJ,HIST1H2BL,HIST2H2BE,KAT5,MDC1,MRE11A,NBN,PIAS4,PRKDC,RAD50,RIF1,TP53BP1,UBE2N,WHSC1,XRCC5,XRCC6
HSA-69473	G2/M DNA damage checkpoint	23	78	2.68e-07	ENSP00000256442,ENSP00000261609,ENSP00000262971,ENSP00000264335,ENSP00000265433,ENSP00000269305,ENSP00000278616,ENSP00000298139,ENSP00000311360,ENSP00000316176,ENSP00000325863,ENSP00000340330,ENSP00000347232,ENSP00000358151,ENSP00000365588,ENSP00000366618,ENSP00000368100,ENSP00000371475,ENSP00000372023,ENSP00000372351,ENSP00000378699,ENSP00000434024,ENSP00000476136	ATM,BLM,CCNB1,CDK1,CHEK2,H2AFX,HERC2,HIST1H2BJ,HIST1H2BL,HIST2H2BE,KAT5,MDC1,MRE11A,NBN,PIAS4,RAD50,RAD9A,TP53,TP53BP1,UBE2N,WHSC1,WRN,YWHAE
HSA-70326	Glucose metabolism	24	85	2.68e-07	ENSP00000216780,ENSP00000229179,ENSP00000229239,ENSP00000231498,ENSP00000254508,ENSP00000261396,ENSP00000264717,ENSP00000283195,ENSP00000285968,ENSP00000310668,ENSP00000319814,ENSP00000324804,ENSP00000352400,ENSP00000356448,ENSP00000359991,ENSP00000361658,ENSP00000362413,ENSP00000367721,ENSP00000370517,ENSP00000377532,ENSP00000400101,ENSP00000402103,ENSP00000444029,ENSP00000458954	GAPDH,GCKR,HK1,NUP107,NUP133,NUP153,NUP155,NUP160,NUP188,NUP205,NUP210,NUP214,NUP88,NUP93,PC,PCK1,PCK2,PFKP,PGAM1,PGK1,PPP2R1A,RANBP2,SLC25A13,TPR
HSA-180746	Nuclear import of Rev protein	15	30	3.04e-07	ENSP00000229179,ENSP00000231498,ENSP00000254508,ENSP00000261396,ENSP00000283195,ENSP00000285968,ENSP00000290158,ENSP00000296930,ENSP00000310668,ENSP00000352400,ENSP00000356448,ENSP00000361658,ENSP00000367721,ENSP00000444029,ENSP00000458954	KPNB1,NPM1,NUP107,NUP133,NUP153,NUP155,NUP160,NUP188,NUP205,NUP210,NUP214,NUP88,NUP93,RANBP2,TPR
HSA-73864	RNA Polymerase I Transcription	23	79	3.13e-07	ENSP00000225916,ENSP00000261245,ENSP00000263025,ENSP00000263754,ENSP00000263857,ENSP00000278823,ENSP00000302640,ENSP00000332194,ENSP00000333633,ENSP00000333920,ENSP00000336687,ENSP00000349508,ENSP00000357644,ENSP00000358151,ENSP00000362592,ENSP00000362649,ENSP00000364678,ENSP00000366618,ENSP00000369424,ENSP00000369716,ENSP00000430432,ENSP00000434024,ENSP00000476136	CBX3,CHD3,CHD4,EHMT2,GATAD2B,H2AFX,HDAC1,HDAC2,HIST1H2BJ,HIST1H2BL,HIST2H2AC,HIST2H2BE,KAT2A,KAT2B,MAPK3,MNAT1,MTA1,MTA2,POLR1A,RBBP4,RBBP7,TTF1,UBTF
HSA-3371497	HSP90 chaperone cycle for steroid hormone receptors (SHR)	19	53	3.31e-07	ENSP00000001008,ENSP00000217133,ENSP00000248437,ENSP00000263168,ENSP00000264071,ENSP00000301071,ENSP00000301072,ENSP00000320295,ENSP00000335153,ENSP00000348965,ENSP00000363822,ENSP00000364802,ENSP00000364805,ENSP00000369127,ENSP00000369703,ENSP00000378199,ENSP00000401010,ENSP00000432083,ENSP00000456206	AR,CAPZA1,CAPZB,DNAJA1,DYNC1H1,ENSG00000258947,FKBP4,HSP90AA1,HSPA1A,HSPA1L,HSPA2,HSPA8,TUBA1A,TUBA1C,TUBA4A,TUBB1,TUBB2A,TUBB4A,TUBB8
HSA-68875	Mitotic Prophase	26	101	3.31e-07	ENSP00000229179,ENSP00000231498,ENSP00000254508,ENSP00000256442,ENSP00000261396,ENSP00000267163,ENSP00000283195,ENSP00000285968,ENSP00000286398,ENSP00000310668,ENSP00000324804,ENSP00000332194,ENSP00000349961,ENSP00000352400,ENSP00000356448,ENSP00000358151,ENSP00000361658,ENSP00000361777,ENSP00000366618,ENSP00000367721,ENSP00000377298,ENSP00000378699,ENSP00000434024,ENSP00000444029,ENSP00000458954…	CCNB1,CDK1,H2AFX,HIST1H2BJ,HIST1H2BL,HIST2H2AC,HIST2H2BE,NUMA1,NUP107,NUP133,NUP153,NUP155,NUP160,NUP188,NUP205,NUP210,NUP214,NUP88,NUP93,PPP2R1A,RANBP2,RB1,SET,SMC2,SMC4,TPR
HSA-8852276	The role of GTSE1 in G2/M progression after G2 checkpoint	22	73	3.65e-07	ENSP00000216802,ENSP00000217133,ENSP00000248437,ENSP00000256442,ENSP00000264071,ENSP00000269305,ENSP00000293362,ENSP00000301071,ENSP00000301072,ENSP00000309474,ENSP00000310129,ENSP00000310572,ENSP00000320295,ENSP00000335153,ENSP00000348442,ENSP00000364298,ENSP00000369703,ENSP00000378699,ENSP00000391211,ENSP00000401802,ENSP00000456206,ENSP00000481029	CCNB1,CDK1,ENSG00000258947,FKBPL,HSP90AA1,PSMC2,PSMC3,PSMC5,PSMC6,PSMD1,PSMD12,PSMD2,PSME2,PSME3,TP53,TUBA1A,TUBA1C,TUBA4A,TUBB1,TUBB2A,TUBB4A,TUBB8
HSA-165054	Rev-mediated nuclear export of HIV RNA	15	31	4.1e-07	ENSP00000229179,ENSP00000231498,ENSP00000254508,ENSP00000261396,ENSP00000283195,ENSP00000285968,ENSP00000310668,ENSP00000352400,ENSP00000356448,ENSP00000361658,ENSP00000367721,ENSP00000384863,ENSP00000401470,ENSP00000444029,ENSP00000458954	NUP107,NUP133,NUP153,NUP155,NUP160,NUP188,NUP205,NUP210,NUP214,NUP88,NUP93,RANBP2,RANGAP1,TPR,XPO1
HSA-4085377	SUMOylation of SUMOylation proteins	15	31	4.1e-07	ENSP00000229179,ENSP00000231498,ENSP00000254508,ENSP00000261396,ENSP00000262971,ENSP00000283195,ENSP00000285968,ENSP00000310668,ENSP00000348056,ENSP00000352400,ENSP00000356448,ENSP00000361658,ENSP00000367721,ENSP00000444029,ENSP00000458954	NUP107,NUP133,NUP153,NUP155,NUP160,NUP188,NUP205,NUP210,NUP214,NUP88,NUP93,PIAS4,RANBP2,TPR,UBE2I
HSA-400253	Circadian Clock	21	67	4.16e-07	ENSP00000212015,ENSP00000242728,ENSP00000254657,ENSP00000263253,ENSP00000264867,ENSP00000268712,ENSP00000302967,ENSP00000308741,ENSP00000323074,ENSP00000326031,ENSP00000340874,ENSP00000341779,ENSP00000348069,ENSP00000359206,ENSP00000378769,ENSP00000384517,ENSP00000385523,ENSP00000387699,ENSP00000405574,ENSP00000417401,ENSP00000437955	ARNTL,BHLHE41,BTRC,CLOCK,CREB1,EP300,HDAC3,HELZ2,HIF1A,MEF2C,NCOR1,PER2,PPARA,PPARGC1A,PPP1CA,PPP1CB,PPP1CC,RAI1,SIRT1,SREBF1,TBL1XR1
HSA-162582	Signal Transduction	237	2605	4.86e-07	ENSP00000001008,ENSP00000005340,ENSP00000178640,ENSP00000205402,ENSP00000211998,ENSP00000216181,ENSP00000216802,ENSP00000217133,ENSP00000217244,ENSP00000218089,ENSP00000219255,ENSP00000219476,ENSP00000219548,ENSP00000225916,ENSP00000226574,ENSP00000227868,ENSP00000228682,ENSP00000228872,ENSP00000229179,ENSP00000230085,ENSP00000232219,ENSP00000232424,ENSP00000244050,ENSP00000248437,ENSP00000250495…	AATF,ACTR2,ACTR3,AGO1,AHCTF1,AKT1,ANXA1,AP2B1,APP,AR,ARHGAP22,ARHGAP29,ARHGDIA,ARHGEF26,ARRB2,ATP2A2,BTRC,BUB1B,CBL,CDC14B,CDC20,CDK1,CDK2,CDK9,CDKN1B,CENPA,CENPF,CGN,CHD1,CHD3,CHD4,CHD8,CKAP5,CLTC,COL5A1,CREB1,CSNK2A1,CSNK2A2,CSNK2B,CTNNA1,CTNNB1,DIAPH3,DLAT,DLD,DNM2,DOCK7,DVL1,DVL2,DVL3,DYNC1H1,E2F1,ECT2,EED,EIF4G1,ENSG00000258947,EP300,EPAS1,ESR1,ESR2,EZH2,FGF10,FKBP1A,FKBP4,FLNA,FOS,FOXO1,FOX…
HSA-168276	NS1 Mediated Effects on Host Pathways	16	37	4.86e-07	ENSP00000229179,ENSP00000231498,ENSP00000254508,ENSP00000261396,ENSP00000261667,ENSP00000283195,ENSP00000285968,ENSP00000290158,ENSP00000310668,ENSP00000352400,ENSP00000356448,ENSP00000361658,ENSP00000367721,ENSP00000438483,ENSP00000444029,ENSP00000458954	KPNA2,KPNA3,KPNB1,NUP107,NUP133,NUP153,NUP155,NUP160,NUP188,NUP205,NUP210,NUP214,NUP88,NUP93,RANBP2,TPR
HSA-5693538	Homology Directed Repair	28	119	4.86e-07	ENSP00000250416,ENSP00000261609,ENSP00000262971,ENSP00000263681,ENSP00000265433,ENSP00000266970,ENSP00000278616,ENSP00000298139,ENSP00000311360,ENSP00000316176,ENSP00000322570,ENSP00000325863,ENSP00000337332,ENSP00000340330,ENSP00000347232,ENSP00000348056,ENSP00000355759,ENSP00000358151,ENSP00000361310,ENSP00000365588,ENSP00000366618,ENSP00000368100,ENSP00000371321,ENSP00000371475,ENSP00000372351…	ATM,BLM,CDK2,H2AFX,HERC2,HIST1H2BJ,HIST1H2BL,HIST2H2BE,KAT5,MDC1,MRE11A,NBN,PARP1,PARP2,PIAS4,POLD2,POLD3,POLE,POLH,RAD50,RAD9A,RFC1,SIRT6,TP53BP1,UBE2I,UBE2N,WHSC1,WRN
HSA-3301854	Nuclear Pore Complex (NPC) Disassembly	15	32	5.44e-07	ENSP00000229179,ENSP00000231498,ENSP00000254508,ENSP00000256442,ENSP00000261396,ENSP00000283195,ENSP00000285968,ENSP00000310668,ENSP00000352400,ENSP00000356448,ENSP00000361658,ENSP00000367721,ENSP00000378699,ENSP00000444029,ENSP00000458954	CCNB1,CDK1,NUP107,NUP133,NUP153,NUP155,NUP160,NUP188,NUP205,NUP210,NUP214,NUP88,NUP93,RANBP2,TPR
HSA-450531	Regulation of mRNA stability by proteins that bind AU-rich elements	23	83	6.18e-07	ENSP00000216802,ENSP00000264951,ENSP00000293362,ENSP00000309474,ENSP00000310129,ENSP00000310572,ENSP00000313007,ENSP00000336712,ENSP00000348442,ENSP00000352400,ENSP00000361777,ENSP00000364802,ENSP00000366997,ENSP00000381216,ENSP00000384863,ENSP00000385269,ENSP00000387911,ENSP00000391211,ENSP00000401802,ENSP00000416255,ENSP00000432083,ENSP00000451828,ENSP00000481029	AKT1,DIS3,EIF4G1,ELAVL1,HSPA1A,HSPA8,KHSRP,NUP214,PABPC1,PARN,PSMC2,PSMC3,PSMC5,PSMC6,PSMD1,PSMD12,PSMD2,PSME2,PSME3,SET,TNPO1,XPO1,XRN1
HSA-176408	Regulation of APC/C activators between G1/S and early anaphase	22	76	6.2e-07	ENSP00000216802,ENSP00000256442,ENSP00000266970,ENSP00000287598,ENSP00000293362,ENSP00000309474,ENSP00000310129,ENSP00000310572,ENSP00000339109,ENSP00000348442,ENSP00000359206,ENSP00000361540,ENSP00000363019,ENSP00000378350,ENSP00000378529,ENSP00000378699,ENSP00000391211,ENSP00000394394,ENSP00000401802,ENSP00000434614,ENSP00000439403,ENSP00000481029	ANAPC1,ANAPC15,ANAPC7,BTRC,BUB1B,CCNB1,CDC20,CDC23,CDC27,CDK1,CDK2,FZR1,PSMC2,PSMC3,PSMC5,PSMC6,PSMD1,PSMD12,PSMD2,PSME2,PSME3,UBE2D1
HSA-201681	TCF dependent signaling in response to WNT	37	198	7.16e-07	ENSP00000005340,ENSP00000216802,ENSP00000217244,ENSP00000262506,ENSP00000263253,ENSP00000293362,ENSP00000301691,ENSP00000309474,ENSP00000310129,ENSP00000310572,ENSP00000316054,ENSP00000318297,ENSP00000324804,ENSP00000332194,ENSP00000340330,ENSP00000344456,ENSP00000348442,ENSP00000352925,ENSP00000358151,ENSP00000359206,ENSP00000362649,ENSP00000365042,ENSP00000365682,ENSP00000366618,ENSP00000368169…	AKT1,BTRC,CHD8,CSNK2A1,CSNK2A2,CSNK2B,CTNNB1,DVL1,DVL2,DVL3,EP300,H2AFX,HDAC1,HIST1H2BJ,HIST1H2BL,HIST2H2AC,HIST2H2BE,KAT5,MYC,PPP2R1A,PSMC2,PSMC3,PSMC5,PSMC6,PSMD1,PSMD12,PSMD2,PSME2,PSME3,RUNX3,RUVBL1,SMARCA4,SOST,TLE1,TRRAP,USP34,XPO1
HSA-176033	Interactions of Vpr with host cellular proteins	15	33	7.21e-07	ENSP00000229179,ENSP00000231498,ENSP00000254508,ENSP00000261396,ENSP00000283195,ENSP00000285968,ENSP00000310668,ENSP00000352400,ENSP00000356448,ENSP00000360671,ENSP00000361658,ENSP00000367721,ENSP00000370808,ENSP00000444029,ENSP00000458954	NUP107,NUP133,NUP153,NUP155,NUP160,NUP188,NUP205,NUP210,NUP214,NUP88,NUP93,RANBP2,SLC25A5,SLC25A6,TPR
HSA-69239	Synthesis of DNA	27	114	7.21e-07	ENSP00000216122,ENSP00000216802,ENSP00000234296,ENSP00000262105,ENSP00000263681,ENSP00000264156,ENSP00000266970,ENSP00000274255,ENSP00000293362,ENSP00000309474,ENSP00000310129,ENSP00000310572,ENSP00000322570,ENSP00000339109,ENSP00000348442,ENSP00000363019,ENSP00000368349,ENSP00000371321,ENSP00000378350,ENSP00000378529,ENSP00000391211,ENSP00000394394,ENSP00000401802,ENSP00000434614,ENSP00000439403…	ANAPC1,ANAPC15,ANAPC7,CDC23,CDC27,CDK2,FZR1,MCM4,MCM5,MCM6,ORC2,POLA1,POLD2,POLD3,POLE,PSMC2,PSMC3,PSMC5,PSMC6,PSMD1,PSMD12,PSMD2,PSME2,PSME3,RFC1,SKP2,UBE2D1
HSA-73854	RNA Polymerase I Promoter Clearance	22	77	7.31e-07	ENSP00000225916,ENSP00000261245,ENSP00000263025,ENSP00000263754,ENSP00000263857,ENSP00000278823,ENSP00000302640,ENSP00000332194,ENSP00000333633,ENSP00000333920,ENSP00000349508,ENSP00000357644,ENSP00000358151,ENSP00000362592,ENSP00000362649,ENSP00000364678,ENSP00000366618,ENSP00000369424,ENSP00000369716,ENSP00000430432,ENSP00000434024,ENSP00000476136	CHD3,CHD4,EHMT2,GATAD2B,H2AFX,HDAC1,HDAC2,HIST1H2BJ,HIST1H2BL,HIST2H2AC,HIST2H2BE,KAT2A,KAT2B,MAPK3,MNAT1,MTA1,MTA2,POLR1A,RBBP4,RBBP7,TTF1,UBTF
HSA-168271	Transport of Ribonucleoproteins into the Host Nucleus	14	28	7.73e-07	ENSP00000229179,ENSP00000231498,ENSP00000254508,ENSP00000261396,ENSP00000283195,ENSP00000285968,ENSP00000290158,ENSP00000310668,ENSP00000352400,ENSP00000356448,ENSP00000361658,ENSP00000367721,ENSP00000444029,ENSP00000458954	KPNB1,NUP107,NUP133,NUP153,NUP155,NUP160,NUP188,NUP205,NUP210,NUP214,NUP88,NUP93,RANBP2,TPR
HSA-168333	NEP/NS2 Interacts with the Cellular Export Machinery	14	28	7.73e-07	ENSP00000229179,ENSP00000231498,ENSP00000254508,ENSP00000261396,ENSP00000283195,ENSP00000285968,ENSP00000310668,ENSP00000352400,ENSP00000356448,ENSP00000361658,ENSP00000367721,ENSP00000384863,ENSP00000444029,ENSP00000458954	NUP107,NUP133,NUP153,NUP155,NUP160,NUP188,NUP205,NUP210,NUP214,NUP88,NUP93,RANBP2,TPR,XPO1
HSA-170822	Regulation of Glucokinase by Glucokinase Regulatory Protein	14	28	7.73e-07	ENSP00000229179,ENSP00000231498,ENSP00000254508,ENSP00000261396,ENSP00000264717,ENSP00000283195,ENSP00000285968,ENSP00000310668,ENSP00000352400,ENSP00000356448,ENSP00000361658,ENSP00000367721,ENSP00000444029,ENSP00000458954	GCKR,NUP107,NUP133,NUP153,NUP155,NUP160,NUP188,NUP205,NUP210,NUP214,NUP88,NUP93,RANBP2,TPR
HSA-1592230	Mitochondrial biogenesis	24	92	7.9e-07	ENSP00000202967,ENSP00000215375,ENSP00000253382,ENSP00000262030,ENSP00000264867,ENSP00000268712,ENSP00000277865,ENSP00000297185,ENSP00000302967,ENSP00000309555,ENSP00000331897,ENSP00000340874,ENSP00000372191,ENSP00000376924,ENSP00000378416,ENSP00000381736,ENSP00000384851,ENSP00000385523,ENSP00000387262,ENSP00000387699,ENSP00000405574,ENSP00000417401,ENSP00000465759,ENSP00000476228	ACSS2,ALAS1,ATP5A1,ATP5B,ATP5D,CREB1,ESRRA,GLUD1,HCFC1,HDAC3,HELZ2,HSPA9,IDH2,IMMT,MEF2C,NCOR1,NRF1,POLRMT,PPARA,PPARGC1A,SIRT3,SIRT4,SIRT5,TBL1XR1
HSA-1428517	The citric acid (TCA) cycle and respiratory electron transport	34	173	7.99e-07	ENSP00000203407,ENSP00000205402,ENSP00000215375,ENSP00000222673,ENSP00000227868,ENSP00000233627,ENSP00000246957,ENSP00000252711,ENSP00000260665,ENSP00000262030,ENSP00000264663,ENSP00000264932,ENSP00000265333,ENSP00000266544,ENSP00000268379,ENSP00000280346,ENSP00000307241,ENSP00000309565,ENSP00000312618,ENSP00000321070,ENSP00000322450,ENSP00000331897,ENSP00000335304,ENSP00000355518,ENSP00000356972…	ACAD9,ATP5A1,ATP5B,ATP5D,DLAT,DLD,DLST,ETFA,FH,IDH2,LRPPRC,ME2,NDUFA10,NDUFA9,NDUFS1,NDUFS2,NDUFS7,NDUFV1,NNT,OGDH,PDHA1,PDHB,PDHX,PDK1,PDP1,SDHA,SDHB,SUCLA2,SUCLG2,TRAP1,UQCRC1,UQCRC2,UQCRH,VDAC1
HSA-2122947	NOTCH1 Intracellular Domain Regulates Transcription	17	45	8.14e-07	ENSP00000225916,ENSP00000232424,ENSP00000261531,ENSP00000263253,ENSP00000263754,ENSP00000264606,ENSP00000268712,ENSP00000302967,ENSP00000334061,ENSP00000357348,ENSP00000362649,ENSP00000365682,ENSP00000367714,ENSP00000405574,ENSP00000430432,ENSP00000437955,ENSP00000479618	EP300,HDAC1,HDAC2,HDAC3,HDAC4,HDAC6,HES1,HES5,HEY2,HIF1A,KAT2A,KAT2B,MYC,NCOR1,SNW1,TBL1XR1,TLE1
HSA-427389	ERCC6 (CSB) and EHMT2 (G9a) positively regulate rRNA expression	17	45	8.14e-07	ENSP00000278823,ENSP00000332194,ENSP00000333633,ENSP00000333920,ENSP00000336687,ENSP00000349508,ENSP00000357644,ENSP00000358151,ENSP00000362592,ENSP00000362649,ENSP00000364678,ENSP00000366618,ENSP00000369424,ENSP00000369716,ENSP00000430432,ENSP00000434024,ENSP00000476136	CBX3,CHD3,CHD4,EHMT2,GATAD2B,H2AFX,HDAC1,HDAC2,HIST1H2BJ,HIST1H2BL,HIST2H2AC,HIST2H2BE,MTA1,MTA2,RBBP4,RBBP7,TTF1
HSA-5696398	Nucleotide Excision Repair	26	109	1.04e-06	ENSP00000156471,ENSP00000249636,ENSP00000250416,ENSP00000261245,ENSP00000262809,ENSP00000263253,ENSP00000263681,ENSP00000264389,ENSP00000285021,ENSP00000301764,ENSP00000316176,ENSP00000318297,ENSP00000322570,ENSP00000343535,ENSP00000348056,ENSP00000350512,ENSP00000351137,ENSP00000355759,ENSP00000364270,ENSP00000364589,ENSP00000371321,ENSP00000374501,ENSP00000376765,ENSP00000384109,ENSP00000480158…	AQR,COPS4,COPS5,CUL4A,CUL4B,DDB1,ELL,EP300,MNAT1,PARP1,PARP2,PIAS1,PIAS3,POLD2,POLD3,POLE,POLR2A,RFC1,RUVBL1,UBE2I,UBE2N,USP7,UVSSA,XAB2,XPA,XPC
HSA-70171	Glycolysis	20	66	1.2e-06	ENSP00000229179,ENSP00000229239,ENSP00000231498,ENSP00000254508,ENSP00000261396,ENSP00000264717,ENSP00000283195,ENSP00000285968,ENSP00000310668,ENSP00000324804,ENSP00000352400,ENSP00000356448,ENSP00000359991,ENSP00000361658,ENSP00000362413,ENSP00000367721,ENSP00000370517,ENSP00000402103,ENSP00000444029,ENSP00000458954	GAPDH,GCKR,HK1,NUP107,NUP133,NUP153,NUP155,NUP160,NUP188,NUP205,NUP210,NUP214,NUP88,NUP93,PFKP,PGAM1,PGK1,PPP2R1A,RANBP2,TPR
HSA-3214815	HDACs deacetylate histones	19	60	1.39e-06	ENSP00000264183,ENSP00000268712,ENSP00000278823,ENSP00000302967,ENSP00000332194,ENSP00000332790,ENSP00000333633,ENSP00000349508,ENSP00000357644,ENSP00000358151,ENSP00000362592,ENSP00000362649,ENSP00000366618,ENSP00000369424,ENSP00000369716,ENSP00000383042,ENSP00000405574,ENSP00000430432,ENSP00000476136	ARID4B,CHD3,CHD4,GATAD2B,HDAC1,HDAC2,HDAC3,HIST1H2BJ,HIST1H2BL,HIST2H2AB,HIST2H2AC,HIST2H2BE,KDM1A,MTA1,MTA2,NCOR1,RBBP4,RBBP7,TBL1XR1
HSA-71406	Pyruvate metabolism and Citric Acid (TCA) cycle	18	54	1.55e-06	ENSP00000205402,ENSP00000222673,ENSP00000227868,ENSP00000264663,ENSP00000264932,ENSP00000265333,ENSP00000280346,ENSP00000307241,ENSP00000321070,ENSP00000331897,ENSP00000335304,ENSP00000355518,ENSP00000364649,ENSP00000367923,ENSP00000369134,ENSP00000376352,ENSP00000379503,ENSP00000419325	DLAT,DLD,DLST,FH,IDH2,ME2,NNT,OGDH,PDHA1,PDHB,PDHX,PDK1,PDP1,SDHA,SDHB,SUCLA2,SUCLG2,VDAC1
HSA-2559586	DNA Damage/Telomere Stress Induced Senescence	19	61	1.7e-06	ENSP00000228872,ENSP00000244534,ENSP00000244573,ENSP00000265433,ENSP00000266970,ENSP00000267163,ENSP00000267415,ENSP00000269305,ENSP00000278616,ENSP00000307705,ENSP00000325863,ENSP00000330074,ENSP00000332194,ENSP00000340330,ENSP00000358151,ENSP00000366618,ENSP00000368100,ENSP00000434024,ENSP00000476136	ATM,CDK2,CDKN1B,H2AFX,HIST1H1A,HIST1H1B,HIST1H1D,HIST1H1E,HIST1H2BJ,HIST1H2BL,HIST2H2AC,HIST2H2BE,KAT5,MRE11A,NBN,RAD50,RB1,TINF2,TP53
HSA-4570464	SUMOylation of RNA binding proteins	16	42	1.7e-06	ENSP00000229179,ENSP00000231498,ENSP00000254508,ENSP00000261396,ENSP00000264279,ENSP00000283195,ENSP00000285968,ENSP00000310668,ENSP00000348056,ENSP00000352400,ENSP00000356448,ENSP00000361658,ENSP00000365439,ENSP00000367721,ENSP00000444029,ENSP00000458954	HNRNPK,NOP58,NUP107,NUP133,NUP153,NUP155,NUP160,NUP188,NUP205,NUP210,NUP214,NUP88,NUP93,RANBP2,TPR,UBE2I
HSA-69618	Mitotic Spindle Checkpoint	25	105	1.79e-06	ENSP00000229179,ENSP00000261396,ENSP00000265295,ENSP00000283195,ENSP00000287598,ENSP00000324804,ENSP00000336868,ENSP00000339109,ENSP00000341779,ENSP00000348965,ENSP00000355465,ENSP00000355922,ENSP00000361540,ENSP00000363019,ENSP00000364585,ENSP00000367721,ENSP00000373312,ENSP00000378295,ENSP00000378350,ENSP00000384863,ENSP00000394394,ENSP00000401470,ENSP00000432768,ENSP00000434614,ENSP00000439403	AHCTF1,ANAPC1,ANAPC15,ANAPC7,BUB1B,CDC20,CDC23,CDC27,CENPA,CENPF,CKAP5,DYNC1H1,INCENP,NUP107,NUP133,NUP160,PPP1CC,PPP2R1A,RANBP2,RANGAP1,RCC2,SEC13,SPDL1,UBE2D1,XPO1
HSA-5693567	HDR through Homologous Recombination (HRR) or Single Strand Annealing (SSA)	26	113	1.81e-06	ENSP00000261609,ENSP00000262971,ENSP00000263681,ENSP00000265433,ENSP00000266970,ENSP00000278616,ENSP00000298139,ENSP00000311360,ENSP00000316176,ENSP00000322570,ENSP00000325863,ENSP00000337332,ENSP00000340330,ENSP00000347232,ENSP00000348056,ENSP00000358151,ENSP00000361310,ENSP00000365588,ENSP00000366618,ENSP00000368100,ENSP00000371321,ENSP00000371475,ENSP00000372351,ENSP00000434024,ENSP00000476136…	ATM,BLM,CDK2,H2AFX,HERC2,HIST1H2BJ,HIST1H2BL,HIST2H2BE,KAT5,MDC1,MRE11A,NBN,PIAS4,POLD2,POLD3,POLE,POLH,RAD50,RAD9A,RFC1,SIRT6,TP53BP1,UBE2I,UBE2N,WHSC1,WRN
HSA-72187	mRNA 3'-end processing	18	56	2.35e-06	ENSP00000216277,ENSP00000238112,ENSP00000245838,ENSP00000245934,ENSP00000268482,ENSP00000300291,ENSP00000307863,ENSP00000326261,ENSP00000362820,ENSP00000362900,ENSP00000364289,ENSP00000376276,ENSP00000397927,ENSP00000420306,ENSP00000421592,ENSP00000438527,ENSP00000452123,ENSP00000484669	ALYREF,CPSF1,CPSF3,DHX38,NCBP1,NUDT21,PAPOLA,POLDIP3,SRRM1,SRSF2,SRSF3,SRSF4,SRSF5,SYMPK,THOC2,THOC5,U2AF2,ZC3H11A
HSA-8878166	Transcriptional regulation by RUNX2	26	115	2.4e-06	ENSP00000216802,ENSP00000219548,ENSP00000232424,ENSP00000256442,ENSP00000263025,ENSP00000264606,ENSP00000264867,ENSP00000267163,ENSP00000274255,ENSP00000293362,ENSP00000302967,ENSP00000309474,ENSP00000310129,ENSP00000310572,ENSP00000311747,ENSP00000334061,ENSP00000348442,ENSP00000357348,ENSP00000363822,ENSP00000378699,ENSP00000384851,ENSP00000391211,ENSP00000401802,ENSP00000405330,ENSP00000451828…	AKT1,AR,CCNB1,CDK1,ESR1,ESRRA,HDAC3,HDAC4,HDAC6,HES1,HEY2,MAPK3,PPARGC1A,PSMC2,PSMC3,PSMC5,PSMC6,PSMD1,PSMD12,PSMD2,PSME2,PSME3,RB1,RBM14,SKP2,STUB1
HSA-69052	Switching of origins to a post-replicative state	22	86	3.28e-06	ENSP00000216122,ENSP00000216802,ENSP00000234296,ENSP00000262105,ENSP00000264156,ENSP00000266970,ENSP00000274255,ENSP00000293362,ENSP00000309474,ENSP00000310129,ENSP00000310572,ENSP00000339109,ENSP00000348442,ENSP00000363019,ENSP00000378350,ENSP00000378529,ENSP00000391211,ENSP00000394394,ENSP00000401802,ENSP00000434614,ENSP00000439403,ENSP00000481029	ANAPC1,ANAPC15,ANAPC7,CDC23,CDC27,CDK2,FZR1,MCM4,MCM5,MCM6,ORC2,PSMC2,PSMC3,PSMC5,PSMC6,PSMD1,PSMD12,PSMD2,PSME2,PSME3,SKP2,UBE2D1
HSA-437239	Recycling pathway of L1	16	45	3.48e-06	ENSP00000217133,ENSP00000248437,ENSP00000264071,ENSP00000301071,ENSP00000301072,ENSP00000309539,ENSP00000320295,ENSP00000347532,ENSP00000353408,ENSP00000356042,ENSP00000363524,ENSP00000369703,ENSP00000373905,ENSP00000456206,ENSP00000479606,ENSP00000482835	AP2B1,CLTC,DNM2,DPYSL2,ENSG00000258947,EZR,KIAA1598,KIF4A,MSN,TUBA1A,TUBA1C,TUBA4A,TUBB1,TUBB2A,TUBB4A,TUBB8
HSA-211000	Gene Silencing by RNA	24	102	3.61e-06	ENSP00000229179,ENSP00000231498,ENSP00000254508,ENSP00000261396,ENSP00000265351,ENSP00000283195,ENSP00000285968,ENSP00000310668,ENSP00000318176,ENSP00000332194,ENSP00000335153,ENSP00000352400,ENSP00000356448,ENSP00000358151,ENSP00000361658,ENSP00000362300,ENSP00000366618,ENSP00000367721,ENSP00000434024,ENSP00000437256,ENSP00000444029,ENSP00000458954,ENSP00000476136,ENSP00000480158	AGO1,DICER1,H2AFX,HIST1H2BJ,HIST1H2BL,HIST2H2AC,HIST2H2BE,HSP90AA1,NUP107,NUP133,NUP153,NUP155,NUP160,NUP188,NUP205,NUP210,NUP214,NUP88,NUP93,POLR2A,PRKRA,RANBP2,TPR,XPO5
HSA-5578749	Transcriptional regulation by small RNAs	20	72	3.61e-06	ENSP00000229179,ENSP00000231498,ENSP00000254508,ENSP00000261396,ENSP00000283195,ENSP00000285968,ENSP00000310668,ENSP00000332194,ENSP00000352400,ENSP00000356448,ENSP00000358151,ENSP00000361658,ENSP00000362300,ENSP00000366618,ENSP00000367721,ENSP00000434024,ENSP00000444029,ENSP00000458954,ENSP00000476136,ENSP00000480158	AGO1,H2AFX,HIST1H2BJ,HIST1H2BL,HIST2H2AC,HIST2H2BE,NUP107,NUP133,NUP153,NUP155,NUP160,NUP188,NUP205,NUP210,NUP214,NUP88,NUP93,POLR2A,RANBP2,TPR
HSA-195721	Signaling by WNT	45	293	3.89e-06	ENSP00000005340,ENSP00000216802,ENSP00000217244,ENSP00000219255,ENSP00000230085,ENSP00000262506,ENSP00000263253,ENSP00000293362,ENSP00000301691,ENSP00000309474,ENSP00000310129,ENSP00000310572,ENSP00000316054,ENSP00000318297,ENSP00000324804,ENSP00000332194,ENSP00000340330,ENSP00000344456,ENSP00000348442,ENSP00000352925,ENSP00000358151,ENSP00000359206,ENSP00000362300,ENSP00000362649,ENSP00000363435…	AGO1,AKT1,AP2B1,ARRB2,BTRC,CHD8,CLTC,CSNK2A1,CSNK2A2,CSNK2B,CTNNB1,DVL1,DVL2,DVL3,EP300,H2AFX,HDAC1,HIST1H2BJ,HIST1H2BL,HIST2H2AC,HIST2H2BE,ITPR3,KAT5,MOV10,MYC,PARD6A,PPP2R1A,PSMC2,PSMC3,PSMC5,PSMC6,PSMD1,PSMD12,PSMD2,PSME2,PSME3,RUNX3,RUVBL1,SMARCA4,SNX3,SOST,TLE1,TRRAP,USP34,XPO1
HSA-389960	Formation of tubulin folding intermediates by CCT/TriC	12	23	4.01e-06	ENSP00000217133,ENSP00000248437,ENSP00000264071,ENSP00000280326,ENSP00000286788,ENSP00000295688,ENSP00000299300,ENSP00000301071,ENSP00000301072,ENSP00000317334,ENSP00000320295,ENSP00000369703	CCT2,CCT3,CCT5,CCT8,ENSG00000258947,TCP1,TUBA1A,TUBA1C,TUBA4A,TUBB1,TUBB2A,TUBB4A
HSA-4090294	SUMOylation of intracellular receptors	12	23	4.01e-06	ENSP00000249636,ENSP00000253727,ENSP00000254066,ENSP00000262971,ENSP00000264606,ENSP00000287820,ENSP00000348056,ENSP00000363822,ENSP00000376765,ENSP00000385523,ENSP00000405330,ENSP00000447173	AR,ESR1,HDAC4,NR1H2,PIAS1,PIAS3,PIAS4,PPARA,PPARG,RARA,UBE2I,VDR
HSA-449147	Signaling by Interleukins	59	439	4.04e-06	ENSP00000216802,ENSP00000226574,ENSP00000247461,ENSP00000262640,ENSP00000263025,ENSP00000263168,ENSP00000263708,ENSP00000264033,ENSP00000264657,ENSP00000269305,ENSP00000284981,ENSP00000293362,ENSP00000297185,ENSP00000299767,ENSP00000304895,ENSP00000306245,ENSP00000309474,ENSP00000310129,ENSP00000310572,ENSP00000316176,ENSP00000316809,ENSP00000317334,ENSP00000324804,ENSP00000327801,ENSP00000332643…	AKT1,ANXA1,ANXA2,APP,BCL6,BTRC,CANX,CAPZA1,CBL,CREB1,FOS,FOXO1,FOXO3,FSCN1,HIF1A,HNRNPF,HSP90AA1,HSP90B1,HSPA8,HSPA9,IRS1,IRS2,JAK1,JUN,LCP1,MAP2K4,MAPK3,MAPK8,MEF2C,MSN,MYC,NDN,NFKB1,P4HB,PIK3R1,PITPNA,PPP2R1A,PSMC2,PSMC3,PSMC5,PSMC6,PSMD1,PSMD12,PSMD2,PSME2,PSME3,PTPN4,RELA,RPLP0,SHC1,SMARCA4,STAT3,TCP1,TP53,TXLNA,UBE2N,VAMP7,VIM,ZEB1
HSA-73762	RNA Polymerase I Transcription Initiation	16	46	4.25e-06	ENSP00000225916,ENSP00000261245,ENSP00000263754,ENSP00000263857,ENSP00000278823,ENSP00000302640,ENSP00000333633,ENSP00000333920,ENSP00000349508,ENSP00000357644,ENSP00000362592,ENSP00000362649,ENSP00000364678,ENSP00000369424,ENSP00000369716,ENSP00000430432	CHD3,CHD4,EHMT2,GATAD2B,HDAC1,HDAC2,KAT2A,KAT2B,MNAT1,MTA1,MTA2,POLR1A,RBBP4,RBBP7,TTF1,UBTF
HSA-5693607	Processing of DNA double-strand break ends	21	81	4.72e-06	ENSP00000261609,ENSP00000262971,ENSP00000265433,ENSP00000266970,ENSP00000278616,ENSP00000298139,ENSP00000311360,ENSP00000316176,ENSP00000325863,ENSP00000337332,ENSP00000340330,ENSP00000347232,ENSP00000348056,ENSP00000358151,ENSP00000365588,ENSP00000366618,ENSP00000368100,ENSP00000371475,ENSP00000372351,ENSP00000434024,ENSP00000476136	ATM,BLM,CDK2,H2AFX,HERC2,HIST1H2BJ,HIST1H2BL,HIST2H2BE,KAT5,MDC1,MRE11A,NBN,PIAS4,RAD50,RAD9A,SIRT6,TP53BP1,UBE2I,UBE2N,WHSC1,WRN
HSA-3214841	PKMTs methylate histone lysines	16	47	5.32e-06	ENSP00000226574,ENSP00000263360,ENSP00000264674,ENSP00000274031,ENSP00000316578,ENSP00000320147,ENSP00000337976,ENSP00000362592,ENSP00000364678,ENSP00000369424,ENSP00000372351,ENSP00000381657,ENSP00000384273,ENSP00000395929,ENSP00000417980,ENSP00000436786	DOT1L,EED,EHMT1,EHMT2,EZH2,KMT2A,MECOM,NFKB1,NSD1,RBBP4,RBBP7,RELA,SETD7,SUV39H1,SUZ12,WHSC1
HSA-69656	Cyclin A:Cdk2-associated events at S phase entry	21	82	5.53e-06	ENSP00000216802,ENSP00000228872,ENSP00000261245,ENSP00000262133,ENSP00000266970,ENSP00000267163,ENSP00000274255,ENSP00000293362,ENSP00000309474,ENSP00000310129,ENSP00000310572,ENSP00000345571,ENSP00000348442,ENSP00000351490,ENSP00000362592,ENSP00000378529,ENSP00000391211,ENSP00000401802,ENSP00000451828,ENSP00000479618,ENSP00000481029	AKT1,CDK2,CDKN1B,E2F1,FZR1,MAX,MNAT1,MYC,PSMC2,PSMC3,PSMC5,PSMC6,PSMD1,PSMD12,PSMD2,PSME2,PSME3,RB1,RBBP4,RBL2,SKP2
HSA-6784531	tRNA processing in the nucleus	17	54	5.86e-06	ENSP00000216038,ENSP00000229179,ENSP00000231498,ENSP00000254508,ENSP00000261396,ENSP00000283195,ENSP00000285968,ENSP00000310668,ENSP00000327821,ENSP00000352400,ENSP00000356448,ENSP00000361658,ENSP00000367721,ENSP00000385787,ENSP00000444029,ENSP00000458954,ENSP00000484669	CPSF1,NUP107,NUP133,NUP153,NUP155,NUP160,NUP188,NUP205,NUP210,NUP214,NUP88,NUP93,POP1,RANBP2,RTCB,TPR,XPOT
HSA-174178	APC/C:Cdh1 mediated degradation of Cdc20 and other APC/C:Cdh1 targeted proteins in late mitosis/early G1	19	68	6.09e-06	ENSP00000216802,ENSP00000216911,ENSP00000274255,ENSP00000293362,ENSP00000309474,ENSP00000310129,ENSP00000310572,ENSP00000339109,ENSP00000348442,ENSP00000361540,ENSP00000363019,ENSP00000378350,ENSP00000378529,ENSP00000391211,ENSP00000394394,ENSP00000401802,ENSP00000434614,ENSP00000439403,ENSP00000481029	ANAPC1,ANAPC15,ANAPC7,AURKA,CDC20,CDC23,CDC27,FZR1,PSMC2,PSMC3,PSMC5,PSMC6,PSMD1,PSMD12,PSMD2,PSME2,PSME3,SKP2,UBE2D1
HSA-180910	Vpr-mediated nuclear import of PICs	13	30	6.65e-06	ENSP00000229179,ENSP00000231498,ENSP00000254508,ENSP00000261396,ENSP00000283195,ENSP00000285968,ENSP00000310668,ENSP00000352400,ENSP00000356448,ENSP00000361658,ENSP00000367721,ENSP00000444029,ENSP00000458954	NUP107,NUP133,NUP153,NUP155,NUP160,NUP188,NUP205,NUP210,NUP214,NUP88,NUP93,RANBP2,TPR
HSA-6804758	Regulation of TP53 Activity through Acetylation	13	30	6.65e-06	ENSP00000263253,ENSP00000268058,ENSP00000269305,ENSP00000278823,ENSP00000307183,ENSP00000349508,ENSP00000357644,ENSP00000362592,ENSP00000362649,ENSP00000369424,ENSP00000369716,ENSP00000430432,ENSP00000451828	AKT1,CHD3,CHD4,EP300,GATAD2B,HDAC1,HDAC2,ING2,MTA2,PML,RBBP4,RBBP7,TP53
HSA-390466	Chaperonin-mediated protein folding	22	92	7.89e-06	ENSP00000217133,ENSP00000217244,ENSP00000218348,ENSP00000248437,ENSP00000262506,ENSP00000264071,ENSP00000264657,ENSP00000269305,ENSP00000280326,ENSP00000286788,ENSP00000295688,ENSP00000299300,ENSP00000301071,ENSP00000301072,ENSP00000302967,ENSP00000317334,ENSP00000320295,ENSP00000364543,ENSP00000365042,ENSP00000366396,ENSP00000369703,ENSP00000483236	CCT2,CCT3,CCT5,CCT8,CSNK2A1,CSNK2A2,CSNK2B,DCAF7,ENSG00000258947,HDAC3,SKIV2L,STAT3,TCP1,TP53,TUBA1A,TUBA1C,TUBA4A,TUBB1,TUBB2A,TUBB4A,USP11,XRN2
HSA-3232118	SUMOylation of transcription factors	10	16	1.01e-05	ENSP00000249636,ENSP00000258149,ENSP00000262971,ENSP00000269305,ENSP00000314080,ENSP00000333188,ENSP00000333633,ENSP00000348056,ENSP00000371475,ENSP00000376765	FOXL2,HIC1,MDM2,MTA1,PIAS1,PIAS3,PIAS4,TP53,TP53BP1,UBE2I
HSA-176409	APC/C:Cdc20 mediated degradation of mitotic proteins	19	71	1.02e-05	ENSP00000216802,ENSP00000256442,ENSP00000287598,ENSP00000293362,ENSP00000309474,ENSP00000310129,ENSP00000310572,ENSP00000339109,ENSP00000348442,ENSP00000361540,ENSP00000363019,ENSP00000378350,ENSP00000378699,ENSP00000391211,ENSP00000394394,ENSP00000401802,ENSP00000434614,ENSP00000439403,ENSP00000481029	ANAPC1,ANAPC15,ANAPC7,BUB1B,CCNB1,CDC20,CDC23,CDC27,CDK1,PSMC2,PSMC3,PSMC5,PSMC6,PSMD1,PSMD12,PSMD2,PSME2,PSME3,UBE2D1
HSA-389957	Prefoldin mediated transfer of substrate to CCT/TriC	12	26	1.02e-05	ENSP00000217133,ENSP00000248437,ENSP00000264071,ENSP00000280326,ENSP00000286788,ENSP00000295688,ENSP00000299300,ENSP00000301071,ENSP00000301072,ENSP00000317334,ENSP00000320295,ENSP00000369703	CCT2,CCT3,CCT5,CCT8,ENSG00000258947,TCP1,TUBA1A,TUBA1C,TUBA4A,TUBB1,TUBB2A,TUBB4A
HSA-913531	Interferon Signaling	33	189	1.05e-05	ENSP00000229179,ENSP00000231498,ENSP00000249636,ENSP00000254508,ENSP00000257570,ENSP00000261396,ENSP00000261667,ENSP00000263025,ENSP00000264350,ENSP00000268058,ENSP00000283195,ENSP00000285968,ENSP00000290158,ENSP00000293831,ENSP00000296577,ENSP00000309142,ENSP00000310668,ENSP00000316176,ENSP00000323889,ENSP00000343204,ENSP00000352400,ENSP00000356448,ENSP00000358866,ENSP00000359485,ENSP00000361658…	ABCE1,CIITA,EIF4A1,EIF4G1,EIF4G3,FLNA,FLNB,GBP6,HERC5,JAK1,KPNA2,KPNA3,KPNB1,MAPK3,NUP107,NUP133,NUP153,NUP155,NUP160,NUP188,NUP205,NUP210,NUP214,NUP88,NUP93,OASL,PDE12,PIAS1,PML,RANBP2,TPR,TRIM25,UBE2N
HSA-75153	Apoptotic execution phase	16	51	1.21e-05	ENSP00000244534,ENSP00000244573,ENSP00000262710,ENSP00000281537,ENSP00000290158,ENSP00000307705,ENSP00000323856,ENSP00000330074,ENSP00000340820,ENSP00000344456,ENSP00000361824,ENSP00000369129,ENSP00000399518,ENSP00000438262,ENSP00000446007,ENSP00000449089	ACIN1,CTNNB1,DNM1L,DSP,HIST1H1A,HIST1H1B,HIST1H1D,HIST1H1E,KPNB1,MAPT,PLEC,SATB1,SPTAN1,TJP1,TJP2,VIM
HSA-109688	Cleavage of Growing Transcript in the Termination Region	18	65	1.24e-05	ENSP00000216277,ENSP00000238112,ENSP00000245838,ENSP00000245934,ENSP00000268482,ENSP00000300291,ENSP00000307863,ENSP00000326261,ENSP00000362820,ENSP00000362900,ENSP00000364289,ENSP00000376276,ENSP00000397927,ENSP00000420306,ENSP00000421592,ENSP00000438527,ENSP00000452123,ENSP00000484669	ALYREF,CPSF1,CPSF3,DHX38,NCBP1,NUDT21,PAPOLA,POLDIP3,SRRM1,SRSF2,SRSF3,SRSF4,SRSF5,SYMPK,THOC2,THOC5,U2AF2,ZC3H11A
HSA-69202	Cyclin E associated events during G1/S transition	20	80	1.29e-05	ENSP00000216802,ENSP00000228872,ENSP00000261245,ENSP00000262133,ENSP00000266970,ENSP00000267163,ENSP00000274255,ENSP00000293362,ENSP00000309474,ENSP00000310129,ENSP00000310572,ENSP00000345571,ENSP00000348442,ENSP00000351490,ENSP00000362592,ENSP00000391211,ENSP00000401802,ENSP00000451828,ENSP00000479618,ENSP00000481029	AKT1,CDK2,CDKN1B,E2F1,MAX,MNAT1,MYC,PSMC2,PSMC3,PSMC5,PSMC6,PSMD1,PSMD12,PSMD2,PSME2,PSME3,RB1,RBBP4,RBL2,SKP2
HSA-71403	Citric acid cycle (TCA cycle)	11	22	1.47e-05	ENSP00000205402,ENSP00000222673,ENSP00000264663,ENSP00000264932,ENSP00000321070,ENSP00000331897,ENSP00000335304,ENSP00000355518,ENSP00000364649,ENSP00000367923,ENSP00000419325	DLD,DLST,FH,IDH2,ME2,NNT,OGDH,SDHA,SDHB,SUCLA2,SUCLG2
HSA-168325	Viral Messenger RNA Synthesis	14	40	1.82e-05	ENSP00000229179,ENSP00000231498,ENSP00000254508,ENSP00000261396,ENSP00000283195,ENSP00000285968,ENSP00000310668,ENSP00000352400,ENSP00000356448,ENSP00000361658,ENSP00000367721,ENSP00000444029,ENSP00000458954,ENSP00000480158	NUP107,NUP133,NUP153,NUP155,NUP160,NUP188,NUP205,NUP210,NUP214,NUP88,NUP93,POLR2A,RANBP2,TPR
HSA-174184	Cdc20:Phospho-APC/C mediated degradation of Cyclin A	18	68	2.06e-05	ENSP00000216802,ENSP00000287598,ENSP00000293362,ENSP00000309474,ENSP00000310129,ENSP00000310572,ENSP00000339109,ENSP00000348442,ENSP00000361540,ENSP00000363019,ENSP00000378350,ENSP00000378699,ENSP00000391211,ENSP00000394394,ENSP00000401802,ENSP00000434614,ENSP00000439403,ENSP00000481029	ANAPC1,ANAPC15,ANAPC7,BUB1B,CDC20,CDC23,CDC27,CDK1,PSMC2,PSMC3,PSMC5,PSMC6,PSMD1,PSMD12,PSMD2,PSME2,PSME3,UBE2D1
HSA-8878159	Transcriptional regulation by RUNX3	21	91	2.07e-05	ENSP00000216802,ENSP00000225916,ENSP00000232424,ENSP00000258149,ENSP00000261531,ENSP00000263253,ENSP00000263754,ENSP00000264606,ENSP00000269305,ENSP00000293362,ENSP00000309474,ENSP00000310129,ENSP00000310572,ENSP00000344456,ENSP00000348442,ENSP00000382800,ENSP00000385824,ENSP00000391211,ENSP00000401802,ENSP00000479618,ENSP00000481029	CTNNB1,EP300,FOXO3,HDAC4,HES1,KAT2A,KAT2B,MDM2,MYC,PSMC2,PSMC3,PSMC5,PSMC6,PSMD1,PSMD12,PSMD2,PSME2,PSME3,RUNX3,SNW1,TP53
HSA-373760	L1CAM interactions	24	116	2.18e-05	ENSP00000217133,ENSP00000217244,ENSP00000248437,ENSP00000262506,ENSP00000263025,ENSP00000264071,ENSP00000301071,ENSP00000301072,ENSP00000309539,ENSP00000320295,ENSP00000347532,ENSP00000349259,ENSP00000353408,ENSP00000356042,ENSP00000361824,ENSP00000363524,ENSP00000365042,ENSP00000369703,ENSP00000373905,ENSP00000432083,ENSP00000432568,ENSP00000456206,ENSP00000479606,ENSP00000482835	AP2B1,CLTC,CSNK2A1,CSNK2A2,CSNK2B,DNM2,DPYSL2,ENSG00000258947,EZR,HSPA8,KIAA1598,KIF4A,MAPK3,MSN,SPTAN1,SPTBN1,SPTBN2,TUBA1A,TUBA1C,TUBA4A,TUBB1,TUBB2A,TUBB4A,TUBB8
HSA-5626467	RHO GTPases activate IQGAPs	12	29	2.32e-05	ENSP00000217133,ENSP00000248437,ENSP00000264071,ENSP00000268182,ENSP00000301071,ENSP00000301072,ENSP00000304669,ENSP00000320295,ENSP00000344456,ENSP00000354451,ENSP00000369703,ENSP00000456206	CTNNA1,CTNNB1,ENSG00000258947,IQGAP1,IQGAP3,TUBA1A,TUBA1C,TUBA4A,TUBB1,TUBB2A,TUBB4A,TUBB8
HSA-2559580	Oxidative Stress Induced Senescence	21	92	2.35e-05	ENSP00000258149,ENSP00000263025,ENSP00000263360,ENSP00000265734,ENSP00000269305,ENSP00000306245,ENSP00000316578,ENSP00000320147,ENSP00000332194,ENSP00000345571,ENSP00000358151,ENSP00000360266,ENSP00000362300,ENSP00000362592,ENSP00000366618,ENSP00000369424,ENSP00000378974,ENSP00000399797,ENSP00000410402,ENSP00000434024,ENSP00000476136	AGO1,CDK6,E2F1,EED,EZH2,FOS,H2AFX,HIST1H2BJ,HIST1H2BL,HIST2H2AC,HIST2H2BE,JUN,MAP2K4,MAPK3,MAPK8,MDM2,MOV10,RBBP4,RBBP7,SUZ12,TP53
HSA-6804756	Regulation of TP53 Activity through Phosphorylation	21	92	2.35e-05	ENSP00000216911,ENSP00000217244,ENSP00000258149,ENSP00000262506,ENSP00000265433,ENSP00000266970,ENSP00000269305,ENSP00000278616,ENSP00000298139,ENSP00000311360,ENSP00000317992,ENSP00000324856,ENSP00000325863,ENSP00000340330,ENSP00000347232,ENSP00000365042,ENSP00000367406,ENSP00000368100,ENSP00000372023,ENSP00000385571,ENSP00000474096	ATM,AURKA,BLM,CDK2,CHEK2,CSNK2A1,CSNK2A2,CSNK2B,HIPK2,KAT5,MDM2,MRE11A,NBN,NOC2L,RAD50,RAD9A,STK11,TAF15,TAF2,TP53,WRN
HSA-5250941	Negative epigenetic regulation of rRNA expression	19	77	2.55e-05	ENSP00000212015,ENSP00000254605,ENSP00000261245,ENSP00000263857,ENSP00000264183,ENSP00000283131,ENSP00000302640,ENSP00000328547,ENSP00000332194,ENSP00000333920,ENSP00000337976,ENSP00000352516,ENSP00000358151,ENSP00000362649,ENSP00000366618,ENSP00000430432,ENSP00000434024,ENSP00000446880,ENSP00000476136	ARID4B,BAZ2A,DNMT1,DNMT3B,H2AFX,HDAC1,HDAC2,HIST1H2BJ,HIST1H2BL,HIST2H2AC,HIST2H2BE,MNAT1,POLR1A,RRP8,SIRT1,SMARCA5,SUV39H1,TTF1,UBTF
HSA-68884	Mitotic Telophase/Cytokinesis	9	14	2.59e-05	ENSP00000218089,ENSP00000260363,ENSP00000282516,ENSP00000297338,ENSP00000298767,ENSP00000303427,ENSP00000313851,ENSP00000323421,ENSP00000354720	KIF23,NIPBL,PDS5A,PDS5B,RAD21,SMC1A,SMC3,STAG2,WAPAL
HSA-1500620	Meiosis	20	85	2.63e-05	ENSP00000216024,ENSP00000218089,ENSP00000265433,ENSP00000266970,ENSP00000267415,ENSP00000278616,ENSP00000297338,ENSP00000323421,ENSP00000325863,ENSP00000332194,ENSP00000347232,ENSP00000348056,ENSP00000350719,ENSP00000354720,ENSP00000358151,ENSP00000366618,ENSP00000368100,ENSP00000378199,ENSP00000434024,ENSP00000476136	ATM,BLM,CDK2,DMC1,H2AFX,HIST1H2BJ,HIST1H2BL,HIST2H2AC,HIST2H2BE,HSPA2,MRE11A,NBN,RAD21,RAD50,SMC1A,SMC3,STAG2,SYNE2,TINF2,UBE2I
HSA-2470946	Cohesin Loading onto Chromatin	8	10	2.88e-05	ENSP00000218089,ENSP00000282516,ENSP00000297338,ENSP00000298767,ENSP00000303427,ENSP00000313851,ENSP00000323421,ENSP00000354720	NIPBL,PDS5A,PDS5B,RAD21,SMC1A,SMC3,STAG2,WAPAL
HSA-3214858	RMTs methylate histone arginines	15	49	2.94e-05	ENSP00000235090,ENSP00000254480,ENSP00000265773,ENSP00000267064,ENSP00000319169,ENSP00000320485,ENSP00000332194,ENSP00000332790,ENSP00000341885,ENSP00000369424,ENSP00000378307,ENSP00000392617,ENSP00000395654,ENSP00000406162,ENSP00000434024	ARID1A,H2AFX,HIST2H2AB,HIST2H2AC,PBRM1,PRMT1,PRMT5,RBBP7,RPS2,SMARCA2,SMARCA4,SMARCC1,SMARCC2,SMARCD2,WDR77
HSA-1980143	Signaling by NOTCH1	18	71	3.21e-05	ENSP00000225916,ENSP00000232424,ENSP00000261531,ENSP00000263253,ENSP00000263754,ENSP00000264606,ENSP00000268712,ENSP00000302967,ENSP00000334061,ENSP00000357348,ENSP00000362649,ENSP00000365682,ENSP00000367714,ENSP00000403701,ENSP00000405574,ENSP00000430432,ENSP00000437955,ENSP00000479618	ARRB2,EP300,HDAC1,HDAC2,HDAC3,HDAC4,HDAC6,HES1,HES5,HEY2,HIF1A,KAT2A,KAT2B,MYC,NCOR1,SNW1,TBL1XR1,TLE1
HSA-447115	Interleukin-12 family signaling	16	57	3.59e-05	ENSP00000216802,ENSP00000247461,ENSP00000262640,ENSP00000263168,ENSP00000264657,ENSP00000297185,ENSP00000316809,ENSP00000317334,ENSP00000327801,ENSP00000343204,ENSP00000346032,ENSP00000353408,ENSP00000381581,ENSP00000385824,ENSP00000400433,ENSP00000449328	ANXA2,CANX,CAPZA1,FOXO3,HNRNPF,HSPA9,JAK1,LCP1,MSN,P4HB,PITPNA,PSME2,RPLP0,STAT3,TCP1,VAMP7
HSA-162587	HIV Life Cycle	27	148	4.01e-05	ENSP00000229179,ENSP00000231498,ENSP00000254508,ENSP00000261245,ENSP00000261396,ENSP00000262809,ENSP00000283195,ENSP00000285968,ENSP00000310668,ENSP00000352257,ENSP00000352400,ENSP00000356448,ENSP00000361658,ENSP00000362361,ENSP00000364289,ENSP00000367406,ENSP00000367721,ENSP00000375978,ENSP00000384863,ENSP00000401470,ENSP00000411825,ENSP00000444029,ENSP00000452454,ENSP00000458954,ENSP00000470252…	CDK9,ELL,GTF2A1,MNAT1,NCBP1,NUP107,NUP133,NUP153,NUP155,NUP160,NUP188,NUP205,NUP210,NUP214,NUP88,NUP93,PDCD6IP,POLR2A,RANBP2,RANGAP1,SUPT5H,TAF15,TAF2,TPR,XPO1,XRCC5,XRCC6
HSA-5617833	Cilium Assembly	32	195	4.12e-05	ENSP00000217133,ENSP00000248437,ENSP00000264071,ENSP00000264335,ENSP00000280326,ENSP00000281142,ENSP00000286788,ENSP00000295688,ENSP00000299300,ENSP00000301071,ENSP00000301072,ENSP00000306105,ENSP00000311505,ENSP00000317334,ENSP00000320295,ENSP00000324292,ENSP00000324804,ENSP00000327077,ENSP00000334061,ENSP00000335153,ENSP00000336712,ENSP00000348965,ENSP00000352572,ENSP00000356774,ENSP00000369257…	AHI1,CCT2,CCT3,CCT5,CCT8,CDK1,CEP131,CEP89,CKAP5,DYNC1H1,ENSG00000258947,FBF1,HDAC6,HSP90AA1,IQCB1,ODF2,PCM1,PCNT,PPP2R1A,RPGRIP1L,SCLT1,TCP1,TNPO1,TUBA1A,TUBA1C,TUBA4A,TUBB1,TUBB2A,TUBB4A,TUBB8,WDR60,YWHAE
HSA-2514853	Condensation of Prometaphase Chromosomes	8	11	4.56e-05	ENSP00000217244,ENSP00000256442,ENSP00000262506,ENSP00000286398,ENSP00000325017,ENSP00000349961,ENSP00000365042,ENSP00000378699	CCNB1,CDK1,CSNK2A1,CSNK2A2,CSNK2B,NCAPD2,SMC2,SMC4
HSA-174084	Autodegradation of Cdh1 by Cdh1:APC/C	16	59	5.1e-05	ENSP00000216802,ENSP00000293362,ENSP00000309474,ENSP00000310129,ENSP00000310572,ENSP00000339109,ENSP00000348442,ENSP00000363019,ENSP00000378350,ENSP00000378529,ENSP00000391211,ENSP00000394394,ENSP00000401802,ENSP00000434614,ENSP00000439403,ENSP00000481029	ANAPC1,ANAPC15,ANAPC7,CDC23,CDC27,FZR1,PSMC2,PSMC3,PSMC5,PSMC6,PSMD1,PSMD12,PSMD2,PSME2,PSME3,UBE2D1
HSA-5696399	Global Genome Nucleotide Excision Repair (GG-NER)	19	83	6.08e-05	ENSP00000249636,ENSP00000250416,ENSP00000261245,ENSP00000263681,ENSP00000264389,ENSP00000285021,ENSP00000301764,ENSP00000316176,ENSP00000318297,ENSP00000322570,ENSP00000348056,ENSP00000350512,ENSP00000355759,ENSP00000364270,ENSP00000364589,ENSP00000371321,ENSP00000376765,ENSP00000384109,ENSP00000480186	COPS4,COPS5,CUL4A,CUL4B,DDB1,MNAT1,PARP1,PARP2,PIAS1,PIAS3,POLD2,POLD3,POLE,RFC1,RUVBL1,UBE2I,UBE2N,XPA,XPC
HSA-69017	CDK-mediated phosphorylation and removal of Cdc6	17	68	6.63e-05	ENSP00000216802,ENSP00000266970,ENSP00000293362,ENSP00000309474,ENSP00000310129,ENSP00000310572,ENSP00000339109,ENSP00000348442,ENSP00000363019,ENSP00000378350,ENSP00000378529,ENSP00000391211,ENSP00000394394,ENSP00000401802,ENSP00000434614,ENSP00000439403,ENSP00000481029	ANAPC1,ANAPC15,ANAPC7,CDC23,CDC27,CDK2,FZR1,PSMC2,PSMC3,PSMC5,PSMC6,PSMD1,PSMD12,PSMD2,PSME2,PSME3,UBE2D1
HSA-162599	Late Phase of HIV Life Cycle	25	135	6.79e-05	ENSP00000229179,ENSP00000231498,ENSP00000254508,ENSP00000261245,ENSP00000261396,ENSP00000262809,ENSP00000283195,ENSP00000285968,ENSP00000310668,ENSP00000352400,ENSP00000356448,ENSP00000361658,ENSP00000362361,ENSP00000364289,ENSP00000367406,ENSP00000367721,ENSP00000384863,ENSP00000401470,ENSP00000411825,ENSP00000444029,ENSP00000452454,ENSP00000458954,ENSP00000470252,ENSP00000474096,ENSP00000480158	CDK9,ELL,GTF2A1,MNAT1,NCBP1,NUP107,NUP133,NUP153,NUP155,NUP160,NUP188,NUP205,NUP210,NUP214,NUP88,NUP93,PDCD6IP,POLR2A,RANBP2,RANGAP1,SUPT5H,TAF15,TAF2,TPR,XPO1
HSA-9020591	Interleukin-12 signaling	14	47	7.54e-05	ENSP00000216802,ENSP00000262640,ENSP00000263168,ENSP00000297185,ENSP00000316809,ENSP00000317334,ENSP00000327801,ENSP00000343204,ENSP00000346032,ENSP00000353408,ENSP00000381581,ENSP00000385824,ENSP00000400433,ENSP00000449328	ANXA2,CAPZA1,FOXO3,HNRNPF,HSPA9,JAK1,LCP1,MSN,P4HB,PITPNA,PSME2,RPLP0,TCP1,VAMP7
HSA-2132295	MHC class II antigen presentation	23	119	8.23e-05	ENSP00000217133,ENSP00000247461,ENSP00000248437,ENSP00000260363,ENSP00000263168,ENSP00000264071,ENSP00000301071,ENSP00000301072,ENSP00000306881,ENSP00000307078,ENSP00000320295,ENSP00000343405,ENSP00000348965,ENSP00000350199,ENSP00000363524,ENSP00000369703,ENSP00000373312,ENSP00000373905,ENSP00000401010,ENSP00000432568,ENSP00000456206,ENSP00000479606,ENSP00000482835	AP1B1,AP2B1,CANX,CAPZA1,CAPZB,CLTC,DNM2,DYNC1H1,ENSG00000258947,KIF23,KIF4A,KIF5B,SEC13,SEC23A,SEC24C,SPTBN2,TUBA1A,TUBA1C,TUBA4A,TUBB1,TUBB2A,TUBB4A,TUBB8
HSA-6781827	Transcription-Coupled Nucleotide Excision Repair (TC-NER)	18	78	9.22e-05	ENSP00000156471,ENSP00000261245,ENSP00000262809,ENSP00000263253,ENSP00000263681,ENSP00000264389,ENSP00000301764,ENSP00000322570,ENSP00000343535,ENSP00000350512,ENSP00000351137,ENSP00000364270,ENSP00000364589,ENSP00000371321,ENSP00000374501,ENSP00000384109,ENSP00000480158,ENSP00000480186	AQR,COPS4,COPS5,CUL4A,CUL4B,DDB1,ELL,EP300,MNAT1,POLD2,POLD3,POLE,POLR2A,RFC1,USP7,UVSSA,XAB2,XPA
HSA-8856688	Golgi-to-ER retrograde transport	24	129	9.3e-05	ENSP00000217133,ENSP00000248437,ENSP00000249923,ENSP00000256682,ENSP00000260363,ENSP00000263168,ENSP00000264071,ENSP00000301071,ENSP00000301072,ENSP00000307078,ENSP00000320295,ENSP00000325002,ENSP00000329419,ENSP00000348965,ENSP00000351832,ENSP00000356436,ENSP00000357048,ENSP00000363524,ENSP00000369703,ENSP00000401010,ENSP00000402346,ENSP00000411418,ENSP00000438388,ENSP00000456206	ARF3,CAPZA1,CAPZB,COPA,COPB1,COPB2,COPG1,COPG2,DYNC1H1,ENSG00000258947,KIF1A,KIF23,KIF4A,KIF5B,PLA2G4A,RAB3GAP1,RAB3GAP2,TUBA1A,TUBA1C,TUBA4A,TUBB1,TUBB2A,TUBB4A,TUBB8
HSA-72306	tRNA processing	21	103	9.5e-05	ENSP00000168216,ENSP00000216038,ENSP00000229179,ENSP00000231498,ENSP00000254508,ENSP00000261396,ENSP00000264670,ENSP00000283195,ENSP00000285968,ENSP00000310668,ENSP00000326948,ENSP00000327821,ENSP00000348722,ENSP00000352400,ENSP00000356448,ENSP00000361658,ENSP00000367721,ENSP00000385787,ENSP00000444029,ENSP00000458954,ENSP00000484669	CPSF1,FTSJ1,HSD17B10,NSUN2,NUP107,NUP133,NUP153,NUP155,NUP160,NUP188,NUP205,NUP210,NUP214,NUP88,NUP93,POP1,PUS7,RANBP2,RTCB,TPR,XPOT
HSA-3371571	HSF1-dependent transactivation	10	23	9.66e-05	ENSP00000001008,ENSP00000263253,ENSP00000307272,ENSP00000335153,ENSP00000354558,ENSP00000364802,ENSP00000364805,ENSP00000378199,ENSP00000431512,ENSP00000432083	EP300,FKBP4,HSF1,HSP90AA1,HSPA1A,HSPA1L,HSPA2,HSPA8,MTOR,RPTOR
HSA-8939243	RUNX1 interacts with co-factors whose precise effect on RUNX1 targets is not known	12	35	9.67e-05	ENSP00000217244,ENSP00000254480,ENSP00000262506,ENSP00000263253,ENSP00000265773,ENSP00000267064,ENSP00000320485,ENSP00000365042,ENSP00000378307,ENSP00000385571,ENSP00000392617,ENSP00000395654	ARID1A,CSNK2A1,CSNK2A2,CSNK2B,EP300,HIPK2,PBRM1,SMARCA2,SMARCA4,SMARCC1,SMARCC2,SMARCD2
HSA-174154	APC/C:Cdc20 mediated degradation of Securin	16	63	9.73e-05	ENSP00000216802,ENSP00000293362,ENSP00000309474,ENSP00000310129,ENSP00000310572,ENSP00000339109,ENSP00000348442,ENSP00000361540,ENSP00000363019,ENSP00000378350,ENSP00000391211,ENSP00000394394,ENSP00000401802,ENSP00000434614,ENSP00000439403,ENSP00000481029	ANAPC1,ANAPC15,ANAPC7,CDC20,CDC23,CDC27,PSMC2,PSMC3,PSMC5,PSMC6,PSMD1,PSMD12,PSMD2,PSME2,PSME3,UBE2D1
HSA-3371568	Attenuation phase	8	13	0.0001	ENSP00000001008,ENSP00000263253,ENSP00000335153,ENSP00000364802,ENSP00000364805,ENSP00000378199,ENSP00000431512,ENSP00000432083	EP300,FKBP4,HSF1,HSP90AA1,HSPA1A,HSPA1L,HSPA2,HSPA8
HSA-6791312	TP53 Regulates Transcription of Cell Cycle Genes	14	49	0.00011	ENSP00000216911,ENSP00000228872,ENSP00000256442,ENSP00000262133,ENSP00000263253,ENSP00000266970,ENSP00000269305,ENSP00000296930,ENSP00000320949,ENSP00000345571,ENSP00000362768,ENSP00000378699,ENSP00000406162,ENSP00000437271	AURKA,CCNB1,CDK1,CDK2,CDKN1B,CNOT1,E2F1,EP300,NPM1,PRMT1,RBL1,RBL2,TNKS1BP1,TP53
HSA-6811436	COPI-independent Golgi-to-ER retrograde traffic	14	49	0.00011	ENSP00000217133,ENSP00000248437,ENSP00000263168,ENSP00000264071,ENSP00000301071,ENSP00000301072,ENSP00000320295,ENSP00000348965,ENSP00000351832,ENSP00000356436,ENSP00000369703,ENSP00000401010,ENSP00000411418,ENSP00000456206	CAPZA1,CAPZB,DYNC1H1,ENSG00000258947,PLA2G4A,RAB3GAP1,RAB3GAP2,TUBA1A,TUBA1C,TUBA4A,TUBB1,TUBB2A,TUBB4A,TUBB8
HSA-2644606	Constitutive Signaling by NOTCH1 PEST Domain Mutants	15	57	0.00012	ENSP00000225916,ENSP00000232424,ENSP00000261531,ENSP00000263253,ENSP00000263754,ENSP00000264606,ENSP00000268712,ENSP00000302967,ENSP00000334061,ENSP00000357348,ENSP00000362649,ENSP00000367714,ENSP00000405574,ENSP00000430432,ENSP00000479618	EP300,HDAC1,HDAC2,HDAC3,HDAC4,HDAC6,HES1,HES5,HEY2,KAT2A,KAT2B,MYC,NCOR1,SNW1,TBL1XR1
HSA-2894862	Constitutive Signaling by NOTCH1 HD+PEST Domain Mutants	15	57	0.00012	ENSP00000225916,ENSP00000232424,ENSP00000261531,ENSP00000263253,ENSP00000263754,ENSP00000264606,ENSP00000268712,ENSP00000302967,ENSP00000334061,ENSP00000357348,ENSP00000362649,ENSP00000367714,ENSP00000405574,ENSP00000430432,ENSP00000479618	EP300,HDAC1,HDAC2,HDAC3,HDAC4,HDAC6,HES1,HES5,HEY2,KAT2A,KAT2B,MYC,NCOR1,SNW1,TBL1XR1
HSA-73886	Chromosome Maintenance	19	88	0.00012	ENSP00000263681,ENSP00000267415,ENSP00000283131,ENSP00000296930,ENSP00000311513,ENSP00000318297,ENSP00000322570,ENSP00000332194,ENSP00000336868,ENSP00000358151,ENSP00000362592,ENSP00000366618,ENSP00000368349,ENSP00000369424,ENSP00000371321,ENSP00000434024,ENSP00000473172,ENSP00000476136,ENSP00000480186	CENPA,H2AFX,HIST1H2BJ,HIST1H2BL,HIST2H2AC,HIST2H2BE,NPM1,POLA1,POLD2,POLD3,POLE,RBBP4,RBBP7,RFC1,RSF1,RUVBL1,RUVBL2,SMARCA5,TINF2
HSA-199977	ER to Golgi Anterograde Transport	26	151	0.00013	ENSP00000217133,ENSP00000248437,ENSP00000249923,ENSP00000256682,ENSP00000263168,ENSP00000264071,ENSP00000301071,ENSP00000301072,ENSP00000306881,ENSP00000320295,ENSP00000325002,ENSP00000325827,ENSP00000329419,ENSP00000343405,ENSP00000348965,ENSP00000349259,ENSP00000357048,ENSP00000361824,ENSP00000369703,ENSP00000373312,ENSP00000377390,ENSP00000382379,ENSP00000401010,ENSP00000402346,ENSP00000432568…	ANKRD28,ARF3,CAPZA1,CAPZB,COPA,COPB1,COPB2,COPG1,COPG2,DYNC1H1,ENSG00000258947,PPP6R3,SEC13,SEC16A,SEC23A,SEC24C,SPTAN1,SPTBN1,SPTBN2,TUBA1A,TUBA1C,TUBA4A,TUBB1,TUBB2A,TUBB4A,TUBB8
HSA-141444	Amplification of signal from unattached kinetochores via a MAD2 inhibitory signal	19	90	0.00015	ENSP00000229179,ENSP00000261396,ENSP00000265295,ENSP00000283195,ENSP00000287598,ENSP00000324804,ENSP00000336868,ENSP00000341779,ENSP00000348965,ENSP00000355465,ENSP00000355922,ENSP00000361540,ENSP00000364585,ENSP00000367721,ENSP00000373312,ENSP00000378295,ENSP00000384863,ENSP00000401470,ENSP00000432768	AHCTF1,BUB1B,CDC20,CENPA,CENPF,CKAP5,DYNC1H1,INCENP,NUP107,NUP133,NUP160,PPP1CC,PPP2R1A,RANBP2,RANGAP1,RCC2,SEC13,SPDL1,XPO1
HSA-3214847	HATs acetylate histones	21	107	0.00015	ENSP00000225916,ENSP00000261497,ENSP00000263253,ENSP00000263754,ENSP00000308022,ENSP00000308741,ENSP00000309555,ENSP00000318297,ENSP00000332194,ENSP00000332790,ENSP00000336750,ENSP00000340330,ENSP00000352925,ENSP00000358151,ENSP00000363779,ENSP00000366618,ENSP00000369424,ENSP00000397259,ENSP00000406037,ENSP00000473172,ENSP00000476136	ATXN7L3,CLOCK,EP300,HCFC1,HIST1H2BJ,HIST1H2BL,HIST2H2AB,HIST2H2AC,HIST2H2BE,IKBKAP,KAT2A,KAT2B,KAT5,KAT8,RBBP7,RUVBL1,RUVBL2,SUPT7L,TADA2B,TRRAP,USP22
HSA-69002	DNA Replication Pre-Initiation	18	82	0.00015	ENSP00000216122,ENSP00000216802,ENSP00000234296,ENSP00000262105,ENSP00000264156,ENSP00000266970,ENSP00000293362,ENSP00000309474,ENSP00000310129,ENSP00000310572,ENSP00000322570,ENSP00000345571,ENSP00000348442,ENSP00000368349,ENSP00000391211,ENSP00000401802,ENSP00000418268,ENSP00000481029	CDK2,E2F1,MCM10,MCM4,MCM5,MCM6,ORC2,POLA1,POLE,PSMC2,PSMC3,PSMC5,PSMC6,PSMD1,PSMD12,PSMD2,PSME2,PSME3
HSA-6807878	COPI-mediated anterograde transport	20	99	0.00016	ENSP00000217133,ENSP00000248437,ENSP00000249923,ENSP00000256682,ENSP00000263168,ENSP00000264071,ENSP00000301071,ENSP00000301072,ENSP00000320295,ENSP00000325002,ENSP00000329419,ENSP00000348965,ENSP00000349259,ENSP00000357048,ENSP00000361824,ENSP00000369703,ENSP00000401010,ENSP00000402346,ENSP00000432568,ENSP00000456206	ARF3,CAPZA1,CAPZB,COPA,COPB1,COPB2,COPG1,COPG2,DYNC1H1,ENSG00000258947,SPTAN1,SPTBN1,SPTBN2,TUBA1A,TUBA1C,TUBA4A,TUBB1,TUBB2A,TUBB4A,TUBB8
HSA-380320	Recruitment of NuMA to mitotic centrosomes	19	91	0.00017	ENSP00000217133,ENSP00000248437,ENSP00000264071,ENSP00000264335,ENSP00000301071,ENSP00000301072,ENSP00000320295,ENSP00000324804,ENSP00000327077,ENSP00000335153,ENSP00000348965,ENSP00000352572,ENSP00000369703,ENSP00000377298,ENSP00000378699,ENSP00000393583,ENSP00000403453,ENSP00000432768,ENSP00000456206	CDK1,CEP131,CKAP5,DYNC1H1,ENSG00000258947,HSP90AA1,NUMA1,ODF2,PCM1,PCNT,PPP2R1A,TUBA1A,TUBA1C,TUBA4A,TUBB1,TUBB2A,TUBB4A,TUBB8,YWHAE
HSA-390471	Association of TriC/CCT with target proteins during biosynthesis	12	38	0.00018	ENSP00000218348,ENSP00000264657,ENSP00000269305,ENSP00000280326,ENSP00000286788,ENSP00000295688,ENSP00000299300,ENSP00000302967,ENSP00000317334,ENSP00000364543,ENSP00000366396,ENSP00000483236	CCT2,CCT3,CCT5,CCT8,DCAF7,HDAC3,SKIV2L,STAT3,TCP1,TP53,USP11,XRN2
HSA-5693548	Sensing of DNA Double Strand Breaks	6	6	0.00018	ENSP00000265433,ENSP00000278616,ENSP00000325863,ENSP00000340330,ENSP00000368100,ENSP00000438483	ATM,KAT5,KPNA2,MRE11A,NBN,RAD50
HSA-201722	Formation of the beta-catenin:TCF transactivating complex	15	60	0.00019	ENSP00000263253,ENSP00000318297,ENSP00000332194,ENSP00000340330,ENSP00000344456,ENSP00000352925,ENSP00000358151,ENSP00000362649,ENSP00000365682,ENSP00000366618,ENSP00000382800,ENSP00000395654,ENSP00000434024,ENSP00000476136,ENSP00000479618	CTNNB1,EP300,H2AFX,HDAC1,HIST1H2BJ,HIST1H2BL,HIST2H2AC,HIST2H2BE,KAT5,MYC,RUNX3,RUVBL1,SMARCA4,TLE1,TRRAP
HSA-5674400	Constitutive Signaling by AKT1 E17K in Cancer	10	26	0.0002	ENSP00000219476,ENSP00000228872,ENSP00000258149,ENSP00000296782,ENSP00000354558,ENSP00000363377,ENSP00000368880,ENSP00000385824,ENSP00000387699,ENSP00000451828	AKT1,CDKN1B,CREB1,FOXO1,FOXO3,FOXO4,MDM2,MTOR,RICTOR,TSC2
HSA-383280	Nuclear Receptor transcription pathway	12	39	0.00021	ENSP00000253727,ENSP00000254066,ENSP00000254227,ENSP00000287820,ENSP00000312987,ENSP00000343925,ENSP00000363822,ENSP00000384851,ENSP00000385523,ENSP00000405330,ENSP00000422488,ENSP00000447173	AR,ESR1,ESR2,ESRRA,ESRRB,HNF4A,NR0B2,NR1H2,PPARA,PPARG,RARA,VDR
HSA-5687128	MAPK6/MAPK4 signaling	18	86	0.00025	ENSP00000216802,ENSP00000293362,ENSP00000309474,ENSP00000310129,ENSP00000310572,ENSP00000348442,ENSP00000360266,ENSP00000362300,ENSP00000364389,ENSP00000368880,ENSP00000378699,ENSP00000384863,ENSP00000385824,ENSP00000391211,ENSP00000399797,ENSP00000401802,ENSP00000479618,ENSP00000481029	AGO1,CDC14B,CDK1,FOXO1,FOXO3,JUN,MOV10,MYC,PSMC2,PSMC3,PSMC5,PSMC6,PSMD1,PSMD12,PSMD2,PSME2,PSME3,XPO1
HSA-1538133	G0 and Early G1	10	27	0.00026	ENSP00000262133,ENSP00000266970,ENSP00000345571,ENSP00000351490,ENSP00000362592,ENSP00000362649,ENSP00000362768,ENSP00000378699,ENSP00000381932,ENSP00000479618	CDK1,CDK2,DYRK1A,E2F1,HDAC1,MAX,MYC,RBBP4,RBL1,RBL2
HSA-1912408	Pre-NOTCH Transcription and Translation	15	62	0.00026	ENSP00000225916,ENSP00000261531,ENSP00000263253,ENSP00000263754,ENSP00000269305,ENSP00000332194,ENSP00000337332,ENSP00000345571,ENSP00000358151,ENSP00000360266,ENSP00000362300,ENSP00000366618,ENSP00000399797,ENSP00000434024,ENSP00000476136	AGO1,E2F1,EP300,H2AFX,HIST1H2BJ,HIST1H2BL,HIST2H2AC,HIST2H2BE,JUN,KAT2A,KAT2B,MOV10,SIRT6,SNW1,TP53
HSA-5653656	Vesicle-mediated transport	70	649	0.00026	ENSP00000005340,ENSP00000216181,ENSP00000217133,ENSP00000219476,ENSP00000248437,ENSP00000249923,ENSP00000250495,ENSP00000256637,ENSP00000256682,ENSP00000260363,ENSP00000262640,ENSP00000263168,ENSP00000263238,ENSP00000264033,ENSP00000264071,ENSP00000264335,ENSP00000264389,ENSP00000268607,ENSP00000281537,ENSP00000284981,ENSP00000299767,ENSP00000301071,ENSP00000301072,ENSP00000306881,ENSP00000307078…	ACTR2,ACTR3,AKT1,ANKRD28,AP1B1,AP2B1,APP,ARF3,ARRB2,CALR,CAPZA1,CAPZB,CBL,CLTC,COPA,COPB1,COPB2,COPG1,COPG2,COPS4,COPS5,DNM2,DVL2,DYNC1H1,ENSG00000258947,GAPVD1,GDI1,GDI2,HSP90AA1,HSP90B1,HSPA8,HYOU1,IGF2R,KIF1A,KIF23,KIF4A,KIF5B,MAP1LC3B,MYH9,MYO1C,MYO5A,NEDD8,PICALM,PLA2G4A,PPP6R3,PUM1,RAB3GAP1,RAB3GAP2,SBF1,SEC13,SEC16A,SEC23A,SEC24C,SNX9,SORT1,SPTAN1,SPTBN1,SPTBN2,TJP1,TRAPPC12,TSC2,TUBA1A,TU…
HSA-69563	p53-Dependent G1 DNA Damage Response	15	62	0.00026	ENSP00000216802,ENSP00000228872,ENSP00000258149,ENSP00000266970,ENSP00000269305,ENSP00000278616,ENSP00000293362,ENSP00000309474,ENSP00000310129,ENSP00000310572,ENSP00000348442,ENSP00000372023,ENSP00000391211,ENSP00000401802,ENSP00000481029	ATM,CDK2,CDKN1B,CHEK2,MDM2,PSMC2,PSMC3,PSMC5,PSMC6,PSMD1,PSMD12,PSMD2,PSME2,PSME3,TP53
HSA-9013694	Signaling by NOTCH4	17	78	0.00026	ENSP00000216802,ENSP00000225916,ENSP00000232424,ENSP00000261531,ENSP00000263253,ENSP00000263754,ENSP00000293362,ENSP00000309474,ENSP00000310129,ENSP00000310572,ENSP00000348442,ENSP00000357348,ENSP00000367714,ENSP00000391211,ENSP00000401802,ENSP00000451828,ENSP00000481029	AKT1,EP300,HES1,HES5,HEY2,KAT2A,KAT2B,PSMC2,PSMC3,PSMC5,PSMC6,PSMD1,PSMD12,PSMD2,PSME2,PSME3,SNW1
HSA-2468052	Establishment of Sister Chromatid Cohesion	7	11	0.00027	ENSP00000218089,ENSP00000297338,ENSP00000298767,ENSP00000303427,ENSP00000313851,ENSP00000323421,ENSP00000354720	PDS5A,PDS5B,RAD21,SMC1A,SMC3,STAG2,WAPAL
HSA-5620912	Anchoring of the basal body to the plasma membrane	19	96	0.00029	ENSP00000248437,ENSP00000264071,ENSP00000264335,ENSP00000281142,ENSP00000301071,ENSP00000306105,ENSP00000311505,ENSP00000324292,ENSP00000324804,ENSP00000327077,ENSP00000335153,ENSP00000348965,ENSP00000352572,ENSP00000356774,ENSP00000369257,ENSP00000378699,ENSP00000393583,ENSP00000403453,ENSP00000432768	AHI1,CDK1,CEP131,CEP89,CKAP5,DYNC1H1,FBF1,HSP90AA1,IQCB1,ODF2,PCM1,PCNT,PPP2R1A,RPGRIP1L,SCLT1,TUBA1A,TUBA4A,TUBB4A,YWHAE
HSA-1989781	PPARA activates gene expression	21	114	0.0003	ENSP00000242057,ENSP00000253727,ENSP00000263253,ENSP00000264867,ENSP00000268712,ENSP00000287820,ENSP00000302967,ENSP00000308741,ENSP00000322229,ENSP00000329357,ENSP00000363193,ENSP00000376924,ENSP00000378416,ENSP00000384517,ENSP00000384851,ENSP00000385523,ENSP00000386665,ENSP00000405574,ENSP00000417401,ENSP00000447149,ENSP00000477707	AHR,ALAS1,ARNTL,CLOCK,EP300,ESRRA,FADS1,FHL2,HDAC3,HELZ2,MED12,NCOR1,NR1H2,NR1H3,NR1H4,NRF1,PPARA,PPARG,PPARGC1A,SP1,TBL1XR1
HSA-5683057	MAPK family signaling cascades	37	273	0.0003	ENSP00000211998,ENSP00000216802,ENSP00000263025,ENSP00000264664,ENSP00000268182,ENSP00000293362,ENSP00000304895,ENSP00000309474,ENSP00000310129,ENSP00000310572,ENSP00000316029,ENSP00000324804,ENSP00000343204,ENSP00000348442,ENSP00000349259,ENSP00000351015,ENSP00000358723,ENSP00000360266,ENSP00000361824,ENSP00000362300,ENSP00000364389,ENSP00000365016,ENSP00000368797,ENSP00000368880,ENSP00000378699…	AGO1,ARRB2,CDC14B,CDK1,FGF10,FOXO1,FOXO3,IQGAP1,IRS1,IRS2,JAK1,JUN,KBTBD7,KSR2,MAPK3,MOV10,MYC,NEFL,NF1,PPP2R1A,PSMC2,PSMC3,PSMC5,PSMC6,PSMD1,PSMD12,PSMD2,PSME2,PSME3,RAP1A,SHC1,SPTAN1,SPTBN1,SPTBN2,TLN1,VCL,XPO1
HSA-174048	APC/C:Cdc20 mediated degradation of Cyclin B	9	22	0.00032	ENSP00000256442,ENSP00000339109,ENSP00000361540,ENSP00000363019,ENSP00000378350,ENSP00000378699,ENSP00000394394,ENSP00000434614,ENSP00000439403	ANAPC1,ANAPC15,ANAPC7,CCNB1,CDC20,CDC23,CDC27,CDK1,UBE2D1
HSA-5358351	Signaling by Hedgehog	24	143	0.00034	ENSP00000216802,ENSP00000217133,ENSP00000228682,ENSP00000248437,ENSP00000264071,ENSP00000293362,ENSP00000301071,ENSP00000301072,ENSP00000309474,ENSP00000310129,ENSP00000310572,ENSP00000320295,ENSP00000327801,ENSP00000348442,ENSP00000351777,ENSP00000359206,ENSP00000369257,ENSP00000369703,ENSP00000377001,ENSP00000380321,ENSP00000391211,ENSP00000401802,ENSP00000403701,ENSP00000481029	ARRB2,BTRC,ENSG00000258947,GLI1,P4HB,PSMC2,PSMC3,PSMC5,PSMC6,PSMD1,PSMD12,PSMD2,PSME2,PSME3,RPGRIP1L,SPOP,TUBA1A,TUBA1C,TUBA4A,TUBB1,TUBB2A,TUBB4A,TULP3,VCP
HSA-212300	PRC2 methylates histones and DNA	12	42	0.00036	ENSP00000263360,ENSP00000316578,ENSP00000320147,ENSP00000328547,ENSP00000332194,ENSP00000352516,ENSP00000358151,ENSP00000362592,ENSP00000366618,ENSP00000369424,ENSP00000434024,ENSP00000476136	DNMT1,DNMT3B,EED,EZH2,H2AFX,HIST1H2BJ,HIST1H2BL,HIST2H2AC,HIST2H2BE,RBBP4,RBBP7,SUZ12
HSA-5696395	Formation of Incision Complex in GG-NER	12	42	0.00036	ENSP00000249636,ENSP00000250416,ENSP00000261245,ENSP00000285021,ENSP00000301764,ENSP00000316176,ENSP00000348056,ENSP00000355759,ENSP00000364270,ENSP00000364589,ENSP00000376765,ENSP00000384109	CUL4A,CUL4B,DDB1,MNAT1,PARP1,PARP2,PIAS1,PIAS3,UBE2I,UBE2N,XPA,XPC
HSA-6804757	Regulation of TP53 Degradation	11	35	0.00036	ENSP00000258149,ENSP00000266970,ENSP00000269305,ENSP00000278616,ENSP00000296782,ENSP00000324804,ENSP00000343535,ENSP00000354558,ENSP00000372023,ENSP00000378699,ENSP00000451828	AKT1,ATM,CDK1,CDK2,CHEK2,MDM2,MTOR,PPP2R1A,RICTOR,TP53,USP7
HSA-190840	Microtubule-dependent trafficking of connexons from Golgi to the plasma membrane	8	17	0.00038	ENSP00000217133,ENSP00000248437,ENSP00000264071,ENSP00000301071,ENSP00000301072,ENSP00000320295,ENSP00000369703,ENSP00000456206	ENSG00000258947,TUBA1A,TUBA1C,TUBA4A,TUBB1,TUBB2A,TUBB4A,TUBB8
HSA-6782135	Dual incision in TC-NER	15	65	0.00038	ENSP00000156471,ENSP00000261245,ENSP00000263253,ENSP00000263681,ENSP00000301764,ENSP00000322570,ENSP00000343535,ENSP00000351137,ENSP00000364270,ENSP00000364589,ENSP00000371321,ENSP00000374501,ENSP00000384109,ENSP00000480158,ENSP00000480186	AQR,CUL4A,CUL4B,DDB1,EP300,MNAT1,POLD2,POLD3,POLE,POLR2A,RFC1,USP7,UVSSA,XAB2,XPA
HSA-199991	Membrane Trafficking	66	612	0.0004	ENSP00000005340,ENSP00000216181,ENSP00000217133,ENSP00000219476,ENSP00000248437,ENSP00000249923,ENSP00000250495,ENSP00000256637,ENSP00000256682,ENSP00000260363,ENSP00000262640,ENSP00000263168,ENSP00000263238,ENSP00000264033,ENSP00000264071,ENSP00000264335,ENSP00000264389,ENSP00000268607,ENSP00000281537,ENSP00000284981,ENSP00000301071,ENSP00000301072,ENSP00000306881,ENSP00000307078,ENSP00000320295…	ACTR2,ACTR3,AKT1,ANKRD28,AP1B1,AP2B1,APP,ARF3,ARRB2,CAPZA1,CAPZB,CBL,CLTC,COPA,COPB1,COPB2,COPG1,COPG2,COPS4,COPS5,DNM2,DVL2,DYNC1H1,ENSG00000258947,GAPVD1,GDI1,GDI2,HSPA8,IGF2R,KIF1A,KIF23,KIF4A,KIF5B,MAP1LC3B,MYH9,MYO1C,MYO5A,NEDD8,PICALM,PLA2G4A,PPP6R3,PUM1,RAB3GAP1,RAB3GAP2,SBF1,SEC13,SEC16A,SEC23A,SEC24C,SNX9,SORT1,SPTAN1,SPTBN1,SPTBN2,TJP1,TRAPPC12,TSC2,TUBA1A,TUBA1C,TUBA4A,TUBB1,TUBB2A,TUB…
HSA-5610787	Hedgehog 'off' state	20	108	0.00041	ENSP00000216802,ENSP00000217133,ENSP00000228682,ENSP00000248437,ENSP00000264071,ENSP00000293362,ENSP00000301071,ENSP00000301072,ENSP00000309474,ENSP00000310129,ENSP00000310572,ENSP00000320295,ENSP00000348442,ENSP00000359206,ENSP00000369257,ENSP00000369703,ENSP00000380321,ENSP00000391211,ENSP00000401802,ENSP00000481029	BTRC,ENSG00000258947,GLI1,PSMC2,PSMC3,PSMC5,PSMC6,PSMD1,PSMD12,PSMD2,PSME2,PSME3,RPGRIP1L,TUBA1A,TUBA1C,TUBA4A,TUBB1,TUBB2A,TUBB4A,TULP3
HSA-2173793	Transcriptional activity of SMAD2/SMAD3:SMAD4 heterotrimer	12	43	0.00043	ENSP00000261531,ENSP00000262158,ENSP00000268712,ENSP00000316357,ENSP00000329357,ENSP00000355759,ENSP00000362361,ENSP00000362649,ENSP00000362768,ENSP00000363019,ENSP00000367797,ENSP00000479618	CDK9,HDAC1,MYC,NCOR1,PARP1,RBL1,SKI,SMAD7,SNW1,SP1,UBE2D1,USP9X
HSA-427413	NoRC negatively regulates rRNA expression	16	74	0.00043	ENSP00000261245,ENSP00000263857,ENSP00000264183,ENSP00000283131,ENSP00000302640,ENSP00000328547,ENSP00000332194,ENSP00000333920,ENSP00000352516,ENSP00000358151,ENSP00000362649,ENSP00000366618,ENSP00000430432,ENSP00000434024,ENSP00000446880,ENSP00000476136	ARID4B,BAZ2A,DNMT1,DNMT3B,H2AFX,HDAC1,HDAC2,HIST1H2BJ,HIST1H2BL,HIST2H2AC,HIST2H2BE,MNAT1,POLR1A,SMARCA5,TTF1,UBTF
HSA-5250924	B-WICH complex positively regulates rRNA expression	14	58	0.00043	ENSP00000225916,ENSP00000263253,ENSP00000263754,ENSP00000263857,ENSP00000283131,ENSP00000332194,ENSP00000335321,ENSP00000342434,ENSP00000346120,ENSP00000358151,ENSP00000366618,ENSP00000370968,ENSP00000434024,ENSP00000476136	BAZ1B,DDX21,EP300,H2AFX,HIST1H2BJ,HIST1H2BL,HIST2H2AC,HIST2H2BE,KAT2A,KAT2B,MYBBP1A,POLR1A,SF3B1,SMARCA5
HSA-5617472	Activation of anterior HOX genes in hindbrain development during early embryogenesis	18	91	0.00043	ENSP00000254066,ENSP00000263253,ENSP00000263360,ENSP00000264010,ENSP00000268712,ENSP00000302967,ENSP00000316578,ENSP00000320147,ENSP00000332194,ENSP00000358151,ENSP00000360266,ENSP00000362592,ENSP00000366618,ENSP00000369424,ENSP00000434024,ENSP00000465676,ENSP00000476136,ENSP00000480158	CTCF,EED,EP300,EZH2,H2AFX,HDAC3,HIST1H2BJ,HIST1H2BL,HIST2H2AC,HIST2H2BE,JUN,NCOR1,PIAS2,POLR2A,RARA,RBBP4,RBBP7,SUZ12
HSA-201688	WNT mediated activation of DVL	6	8	0.00047	ENSP00000005340,ENSP00000217244,ENSP00000262506,ENSP00000316054,ENSP00000365042,ENSP00000368169	CSNK2A1,CSNK2A2,CSNK2B,DVL1,DVL2,DVL3
HSA-450408	AUF1 (hnRNP D0) binds and destabilizes mRNA	13	51	0.00047	ENSP00000216802,ENSP00000293362,ENSP00000309474,ENSP00000310129,ENSP00000310572,ENSP00000313007,ENSP00000348442,ENSP00000364802,ENSP00000391211,ENSP00000401802,ENSP00000416255,ENSP00000432083,ENSP00000481029	EIF4G1,HSPA1A,HSPA8,PABPC1,PSMC2,PSMC3,PSMC5,PSMC6,PSMD1,PSMD12,PSMD2,PSME2,PSME3
HSA-176407	Conversion from APC/C:Cdc20 to APC/C:Cdh1 in late anaphase	8	18	0.00049	ENSP00000339109,ENSP00000361540,ENSP00000363019,ENSP00000378350,ENSP00000378529,ENSP00000394394,ENSP00000434614,ENSP00000439403	ANAPC1,ANAPC15,ANAPC7,CDC20,CDC23,CDC27,FZR1,UBE2D1
HSA-176412	Phosphorylation of the APC/C	8	18	0.00049	ENSP00000256442,ENSP00000339109,ENSP00000363019,ENSP00000378350,ENSP00000378699,ENSP00000394394,ENSP00000434614,ENSP00000439403	ANAPC1,ANAPC15,ANAPC7,CCNB1,CDC23,CDC27,CDK1,UBE2D1
HSA-6804114	TP53 Regulates Transcription of Genes Involved in G2 Cell Cycle Arrest	8	18	0.00049	ENSP00000216911,ENSP00000256442,ENSP00000262133,ENSP00000263253,ENSP00000269305,ENSP00000362768,ENSP00000378699,ENSP00000406162	AURKA,CCNB1,CDK1,EP300,PRMT1,RBL1,RBL2,TP53
HSA-68949	Orc1 removal from chromatin	15	68	0.00056	ENSP00000216122,ENSP00000216802,ENSP00000234296,ENSP00000262105,ENSP00000264156,ENSP00000266970,ENSP00000274255,ENSP00000293362,ENSP00000309474,ENSP00000310129,ENSP00000310572,ENSP00000348442,ENSP00000391211,ENSP00000401802,ENSP00000481029	CDK2,MCM4,MCM5,MCM6,ORC2,PSMC2,PSMC3,PSMC5,PSMC6,PSMD1,PSMD12,PSMD2,PSME2,PSME3,SKP2
HSA-2565942	Regulation of PLK1 Activity at G2/M Transition	17	85	0.00057	ENSP00000216911,ENSP00000248437,ENSP00000256442,ENSP00000264071,ENSP00000264335,ENSP00000301071,ENSP00000324804,ENSP00000327077,ENSP00000335153,ENSP00000348965,ENSP00000352572,ENSP00000359206,ENSP00000378699,ENSP00000378769,ENSP00000393583,ENSP00000403453,ENSP00000432768	AURKA,BTRC,CCNB1,CDK1,CEP131,CKAP5,DYNC1H1,HSP90AA1,ODF2,PCM1,PCNT,PPP1CB,PPP2R1A,TUBA1A,TUBA4A,TUBB4A,YWHAE
HSA-1912422	Pre-NOTCH Expression and Processing	16	77	0.00061	ENSP00000225916,ENSP00000261531,ENSP00000263253,ENSP00000263754,ENSP00000269305,ENSP00000332194,ENSP00000337332,ENSP00000345571,ENSP00000358151,ENSP00000360266,ENSP00000362300,ENSP00000366618,ENSP00000399797,ENSP00000434024,ENSP00000440045,ENSP00000476136	AGO1,ATP2A2,E2F1,EP300,H2AFX,HIST1H2BJ,HIST1H2BL,HIST2H2AC,HIST2H2BE,JUN,KAT2A,KAT2B,MOV10,SIRT6,SNW1,TP53
HSA-8950505	Gene and protein expression by JAK-STAT signaling after Interleukin-12 stimulation	11	38	0.00061	ENSP00000216802,ENSP00000263168,ENSP00000297185,ENSP00000316809,ENSP00000317334,ENSP00000346032,ENSP00000353408,ENSP00000381581,ENSP00000385824,ENSP00000400433,ENSP00000449328	ANXA2,CAPZA1,FOXO3,HNRNPF,HSPA9,LCP1,MSN,PITPNA,PSME2,RPLP0,TCP1
HSA-6781823	Formation of TC-NER Pre-Incision Complex	13	53	0.00063	ENSP00000156471,ENSP00000261245,ENSP00000263253,ENSP00000264389,ENSP00000301764,ENSP00000343535,ENSP00000350512,ENSP00000351137,ENSP00000364270,ENSP00000364589,ENSP00000374501,ENSP00000384109,ENSP00000480158	AQR,COPS4,COPS5,CUL4A,CUL4B,DDB1,EP300,MNAT1,POLR2A,USP7,UVSSA,XAB2,XPA
HSA-69541	Stabilization of p53	13	53	0.00063	ENSP00000216802,ENSP00000258149,ENSP00000269305,ENSP00000278616,ENSP00000293362,ENSP00000309474,ENSP00000310129,ENSP00000310572,ENSP00000348442,ENSP00000372023,ENSP00000391211,ENSP00000401802,ENSP00000481029	ATM,CHEK2,MDM2,PSMC2,PSMC3,PSMC5,PSMC6,PSMD1,PSMD12,PSMD2,PSME2,PSME3,TP53
HSA-141430	Inactivation of APC/C via direct inhibition of the APC/C complex	8	19	0.00064	ENSP00000287598,ENSP00000339109,ENSP00000361540,ENSP00000363019,ENSP00000378350,ENSP00000394394,ENSP00000434614,ENSP00000439403	ANAPC1,ANAPC15,ANAPC7,BUB1B,CDC20,CDC23,CDC27,UBE2D1
HSA-6804760	Regulation of TP53 Activity through Methylation	8	19	0.00064	ENSP00000258149,ENSP00000263253,ENSP00000269305,ENSP00000278616,ENSP00000319169,ENSP00000364678,ENSP00000372023,ENSP00000417980	ATM,CHEK2,EHMT1,EHMT2,EP300,MDM2,PRMT5,TP53
HSA-983169	Class I MHC mediated antigen processing & presentation	44	365	0.00065	ENSP00000216802,ENSP00000219548,ENSP00000247461,ENSP00000256474,ENSP00000260983,ENSP00000261609,ENSP00000263228,ENSP00000264122,ENSP00000264350,ENSP00000266087,ENSP00000274255,ENSP00000293362,ENSP00000306881,ENSP00000309474,ENSP00000310129,ENSP00000310572,ENSP00000316176,ENSP00000320324,ENSP00000320866,ENSP00000323687,ENSP00000324173,ENSP00000339109,ENSP00000340648,ENSP00000343405,ENSP00000346437…	ANAPC1,ANAPC7,ATG7,BTRC,CALR,CANX,CBLB,CDC20,CDC23,CDC27,CUL7,FBXO7,FZR1,HECTD1,HECW2,HERC2,HERC5,HSPA5,HUWE1,KBTBD7,NPEPPS,PSMC2,PSMC3,PSMC5,PSMC6,PSMD1,PSMD12,PSMD2,PSME2,PSME3,SEC13,SEC23A,SEC24C,SKP2,STUB1,TPP2,TRIP12,UBE2D1,UBE2N,UBE2O,UBE2R2,UBR4,VHL,VPRBP
HSA-8953750	Transcriptional Regulation by E2F6	10	32	0.00071	ENSP00000263360,ENSP00000316578,ENSP00000320147,ENSP00000336687,ENSP00000345571,ENSP00000351490,ENSP00000362592,ENSP00000364678,ENSP00000369424,ENSP00000417980	CBX3,E2F1,EED,EHMT1,EHMT2,EZH2,MAX,RBBP4,RBBP7,SUZ12
HSA-6811434	COPI-dependent Golgi-to-ER retrograde traffic	18	96	0.00072	ENSP00000217133,ENSP00000248437,ENSP00000249923,ENSP00000256682,ENSP00000260363,ENSP00000264071,ENSP00000301071,ENSP00000301072,ENSP00000307078,ENSP00000320295,ENSP00000325002,ENSP00000329419,ENSP00000357048,ENSP00000363524,ENSP00000369703,ENSP00000402346,ENSP00000438388,ENSP00000456206	ARF3,COPA,COPB1,COPB2,COPG1,COPG2,ENSG00000258947,KIF1A,KIF23,KIF4A,KIF5B,TUBA1A,TUBA1C,TUBA4A,TUBB1,TUBB2A,TUBB4A,TUBB8
HSA-1234176	Oxygen-dependent proline hydroxylation of Hypoxia-inducible Factor Alpha	14	62	0.00073	ENSP00000216802,ENSP00000250457,ENSP00000256474,ENSP00000263734,ENSP00000293362,ENSP00000309474,ENSP00000310129,ENSP00000310572,ENSP00000348442,ENSP00000363019,ENSP00000391211,ENSP00000401802,ENSP00000437955,ENSP00000481029	EGLN3,EPAS1,HIF1A,PSMC2,PSMC3,PSMC5,PSMC6,PSMD1,PSMD12,PSMD2,PSME2,PSME3,UBE2D1,VHL
HSA-6785807	Interleukin-4 and Interleukin-13 signaling	19	106	0.0008	ENSP00000264657,ENSP00000269305,ENSP00000299767,ENSP00000306245,ENSP00000332643,ENSP00000335153,ENSP00000343204,ENSP00000354487,ENSP00000366109,ENSP00000368880,ENSP00000371798,ENSP00000384371,ENSP00000385824,ENSP00000428056,ENSP00000432083,ENSP00000437955,ENSP00000446007,ENSP00000451828,ENSP00000479618	AKT1,ANXA1,BCL6,FOS,FOXO1,FOXO3,FSCN1,HIF1A,HSP90AA1,HSP90B1,HSPA8,JAK1,MYC,NDN,PIK3R1,STAT3,TP53,VIM,ZEB1
HSA-1234174	Regulation of Hypoxia-inducible Factor (HIF) by oxygen	15	71	0.00081	ENSP00000216802,ENSP00000250457,ENSP00000256474,ENSP00000263253,ENSP00000263734,ENSP00000293362,ENSP00000309474,ENSP00000310129,ENSP00000310572,ENSP00000348442,ENSP00000363019,ENSP00000391211,ENSP00000401802,ENSP00000437955,ENSP00000481029	EGLN3,EP300,EPAS1,HIF1A,PSMC2,PSMC3,PSMC5,PSMC6,PSMD1,PSMD12,PSMD2,PSME2,PSME3,UBE2D1,VHL
HSA-983168	Antigen processing: Ubiquitination & Proteasome degradation	38	303	0.00087	ENSP00000216802,ENSP00000219548,ENSP00000256474,ENSP00000260983,ENSP00000261609,ENSP00000263228,ENSP00000264122,ENSP00000264350,ENSP00000266087,ENSP00000274255,ENSP00000293362,ENSP00000309474,ENSP00000310129,ENSP00000310572,ENSP00000316176,ENSP00000320324,ENSP00000323687,ENSP00000339109,ENSP00000340648,ENSP00000346437,ENSP00000348442,ENSP00000359206,ENSP00000361540,ENSP00000363019,ENSP00000364403…	ANAPC1,ANAPC7,ATG7,BTRC,CBLB,CDC20,CDC23,CDC27,CUL7,FBXO7,FZR1,HECTD1,HECW2,HERC2,HERC5,HUWE1,KBTBD7,NPEPPS,PSMC2,PSMC3,PSMC5,PSMC6,PSMD1,PSMD12,PSMD2,PSME2,PSME3,SKP2,STUB1,TPP2,TRIP12,UBE2D1,UBE2N,UBE2O,UBE2R2,UBR4,VHL,VPRBP
HSA-1280218	Adaptive Immune System	74	733	0.0009	ENSP00000216802,ENSP00000217133,ENSP00000219548,ENSP00000226574,ENSP00000247461,ENSP00000248437,ENSP00000256474,ENSP00000260363,ENSP00000260983,ENSP00000261609,ENSP00000263168,ENSP00000263228,ENSP00000264071,ENSP00000264122,ENSP00000264350,ENSP00000266087,ENSP00000274255,ENSP00000293362,ENSP00000296782,ENSP00000301071,ENSP00000301072,ENSP00000306881,ENSP00000307078,ENSP00000309474,ENSP00000310129…	AKT1,ANAPC1,ANAPC7,AP1B1,AP2B1,ATG7,BTRC,CALR,CANX,CAPZA1,CAPZB,CBLB,CDC20,CDC23,CDC27,CLTC,CUL7,DNM2,DYNC1H1,ENSG00000258947,FBXO7,FKBP1A,FZR1,HECTD1,HECW2,HERC2,HERC5,HSPA5,HUWE1,ITPR3,KBTBD7,KIF23,KIF4A,KIF5B,MTOR,NFKB1,NPEPPS,PIK3R1,PPP2R1A,PSMC2,PSMC3,PSMC5,PSMC6,PSMD1,PSMD12,PSMD2,PSME2,PSME3,RAP1A,RELA,RICTOR,SEC13,SEC23A,SEC24C,SKP2,SPTBN2,STUB1,THEM4,TPP2,TRIP12,TUBA1A,TUBA1C,TUBA4A,TUBB…
HSA-2454202	Fc epsilon receptor (FCERI) signaling	21	126	0.0009	ENSP00000216802,ENSP00000226574,ENSP00000263025,ENSP00000293362,ENSP00000306245,ENSP00000309474,ENSP00000310129,ENSP00000310572,ENSP00000316176,ENSP00000348442,ENSP00000359206,ENSP00000360266,ENSP00000363019,ENSP00000363435,ENSP00000378974,ENSP00000384273,ENSP00000391211,ENSP00000401802,ENSP00000410402,ENSP00000428056,ENSP00000481029	BTRC,FOS,ITPR3,JUN,MAP2K4,MAPK3,MAPK8,NFKB1,PIK3R1,PSMC2,PSMC3,PSMC5,PSMC6,PSMD1,PSMD12,PSMD2,PSME2,PSME3,RELA,UBE2D1,UBE2N
HSA-6782210	Gap-filling DNA repair synthesis and ligation in TC-NER	14	64	0.00095	ENSP00000156471,ENSP00000261245,ENSP00000263253,ENSP00000263681,ENSP00000301764,ENSP00000322570,ENSP00000343535,ENSP00000351137,ENSP00000364589,ENSP00000371321,ENSP00000374501,ENSP00000384109,ENSP00000480158,ENSP00000480186	AQR,CUL4A,CUL4B,DDB1,EP300,MNAT1,POLD2,POLD3,POLE,POLR2A,RFC1,USP7,UVSSA,XAB2
HSA-8956320	Nucleobase biosynthesis	7	15	0.00098	ENSP00000236959,ENSP00000264705,ENSP00000313490,ENSP00000321584,ENSP00000371253,ENSP00000382595,ENSP00000419851	ATIC,CAD,GART,GMPS,IMPDH2,PAICS,PFAS
HSA-68867	Assembly of the pre-replicative complex	14	65	0.0011	ENSP00000216122,ENSP00000216802,ENSP00000234296,ENSP00000262105,ENSP00000264156,ENSP00000293362,ENSP00000309474,ENSP00000310129,ENSP00000310572,ENSP00000345571,ENSP00000348442,ENSP00000391211,ENSP00000401802,ENSP00000481029	E2F1,MCM4,MCM5,MCM6,ORC2,PSMC2,PSMC3,PSMC5,PSMC6,PSMD1,PSMD12,PSMD2,PSME2,PSME3
HSA-2299718	Condensation of Prophase Chromosomes	11	42	0.0012	ENSP00000256442,ENSP00000267163,ENSP00000286398,ENSP00000332194,ENSP00000349961,ENSP00000358151,ENSP00000361777,ENSP00000366618,ENSP00000378699,ENSP00000434024,ENSP00000476136	CCNB1,CDK1,H2AFX,HIST1H2BJ,HIST1H2BL,HIST2H2AC,HIST2H2BE,RB1,SET,SMC2,SMC4
HSA-379724	tRNA Aminoacylation	11	42	0.0012	ENSP00000234677,ENSP00000244571,ENSP00000256854,ENSP00000261772,ENSP00000325448,ENSP00000343885,ENSP00000347495,ENSP00000355889,ENSP00000358549,ENSP00000373918,ENSP00000472847	AARS,AARS2,GARS,IARS2,KARS,NARS,PPA2,RARS2,SARS,SARS2,WARS
HSA-8948751	Regulation of PTEN stability and activity	14	66	0.0012	ENSP00000216802,ENSP00000217244,ENSP00000219548,ENSP00000262506,ENSP00000293362,ENSP00000309474,ENSP00000310129,ENSP00000310572,ENSP00000348442,ENSP00000365042,ENSP00000391211,ENSP00000401802,ENSP00000451828,ENSP00000481029	AKT1,CSNK2A1,CSNK2A2,CSNK2B,PSMC2,PSMC3,PSMC5,PSMC6,PSMD1,PSMD12,PSMD2,PSME2,PSME3,STUB1
HSA-1221632	Meiotic synapsis	13	58	0.0013	ENSP00000218089,ENSP00000267415,ENSP00000297338,ENSP00000323421,ENSP00000332194,ENSP00000348056,ENSP00000350719,ENSP00000354720,ENSP00000358151,ENSP00000366618,ENSP00000378199,ENSP00000434024,ENSP00000476136	H2AFX,HIST1H2BJ,HIST1H2BL,HIST2H2AC,HIST2H2BE,HSPA2,RAD21,SMC1A,SMC3,STAG2,SYNE2,TINF2,UBE2I
HSA-204174	Regulation of pyruvate dehydrogenase (PDH) complex	7	16	0.0013	ENSP00000205402,ENSP00000227868,ENSP00000280346,ENSP00000307241,ENSP00000369134,ENSP00000376352,ENSP00000379503	DLAT,DLD,PDHA1,PDHB,PDHX,PDK1,PDP1
HSA-2219528	PI3K/AKT Signaling in Cancer	16	85	0.0015	ENSP00000219476,ENSP00000228872,ENSP00000258149,ENSP00000264664,ENSP00000296782,ENSP00000304895,ENSP00000343925,ENSP00000354558,ENSP00000363377,ENSP00000365016,ENSP00000368880,ENSP00000385824,ENSP00000387699,ENSP00000405330,ENSP00000428056,ENSP00000451828	AKT1,CDKN1B,CREB1,ESR1,ESR2,FGF10,FOXO1,FOXO3,FOXO4,IRS1,IRS2,MDM2,MTOR,PIK3R1,RICTOR,TSC2
HSA-8941858	Regulation of RUNX3 expression and activity	12	51	0.0015	ENSP00000216802,ENSP00000258149,ENSP00000263253,ENSP00000293362,ENSP00000309474,ENSP00000310129,ENSP00000310572,ENSP00000348442,ENSP00000382800,ENSP00000391211,ENSP00000401802,ENSP00000481029	EP300,MDM2,PSMC2,PSMC3,PSMC5,PSMC6,PSMD1,PSMD12,PSMD2,PSME2,PSME3,RUNX3
HSA-8939902	Regulation of RUNX2 expression and activity	14	68	0.0016	ENSP00000216802,ENSP00000219548,ENSP00000264867,ENSP00000274255,ENSP00000293362,ENSP00000309474,ENSP00000310129,ENSP00000310572,ENSP00000348442,ENSP00000384851,ENSP00000391211,ENSP00000401802,ENSP00000405330,ENSP00000481029	ESR1,ESRRA,PPARGC1A,PSMC2,PSMC3,PSMC5,PSMC6,PSMD1,PSMD12,PSMD2,PSME2,PSME3,SKP2,STUB1
HSA-111465	Apoptotic cleavage of cellular proteins	10	37	0.0017	ENSP00000262710,ENSP00000281537,ENSP00000323856,ENSP00000340820,ENSP00000344456,ENSP00000361824,ENSP00000369129,ENSP00000399518,ENSP00000438262,ENSP00000446007	ACIN1,CTNNB1,DSP,MAPT,PLEC,SATB1,SPTAN1,TJP1,TJP2,VIM
HSA-174113	SCF-beta-TrCP mediated degradation of Emi1	12	52	0.0017	ENSP00000216802,ENSP00000293362,ENSP00000309474,ENSP00000310129,ENSP00000310572,ENSP00000348442,ENSP00000359206,ENSP00000361540,ENSP00000378529,ENSP00000391211,ENSP00000401802,ENSP00000481029	BTRC,CDC20,FZR1,PSMC2,PSMC3,PSMC5,PSMC6,PSMD1,PSMD12,PSMD2,PSME2,PSME3
HSA-606279	Deposition of new CENPA-containing nucleosomes at the centromere	12	52	0.0017	ENSP00000283131,ENSP00000296930,ENSP00000311513,ENSP00000318297,ENSP00000332194,ENSP00000336868,ENSP00000358151,ENSP00000362592,ENSP00000366618,ENSP00000369424,ENSP00000434024,ENSP00000476136	CENPA,H2AFX,HIST1H2BJ,HIST1H2BL,HIST2H2AC,HIST2H2BE,NPM1,RBBP4,RBBP7,RSF1,RUVBL1,SMARCA5
HSA-70895	Branched-chain amino acid catabolism	8	23	0.0017	ENSP00000168216,ENSP00000205402,ENSP00000265594,ENSP00000265838,ENSP00000269980,ENSP00000343657,ENSP00000359151,ENSP00000418397	ACAT1,BCKDHA,DBT,DLD,HSD17B10,IVD,MCCC1,MCCC2
HSA-72165	mRNA Splicing - Minor Pathway	12	52	0.0017	ENSP00000266079,ENSP00000310723,ENSP00000317123,ENSP00000318861,ENSP00000335321,ENSP00000361626,ENSP00000364289,ENSP00000376276,ENSP00000392094,ENSP00000460348,ENSP00000464050,ENSP00000480158	DDX23,DDX42,EFTUD2,NCBP1,POLR2A,PRPF6,PRPF8,SF3B1,SF3B2,SNRNP200,SRSF2,YBX1
HSA-8951664	Neddylation	30	227	0.0017	ENSP00000216802,ENSP00000250495,ENSP00000252050,ENSP00000256474,ENSP00000263734,ENSP00000264389,ENSP00000266087,ENSP00000274255,ENSP00000293362,ENSP00000297579,ENSP00000301764,ENSP00000309474,ENSP00000310129,ENSP00000310572,ENSP00000341351,ENSP00000348442,ENSP00000350512,ENSP00000359206,ENSP00000363019,ENSP00000364589,ENSP00000368797,ENSP00000369424,ENSP00000384109,ENSP00000391211,ENSP00000401802…	BTRC,COPS4,COPS5,CUL4A,CUL4B,CUL7,CUL9,DCAF11,DCAF13,DCAF5,DCAF7,DDB1,EPAS1,FBXO7,HIF1A,KBTBD7,NEDD8,PSMC2,PSMC3,PSMC5,PSMC6,PSMD1,PSMD12,PSMD2,PSME2,PSME3,RBBP7,SKP2,UBE2D1,VHL
HSA-8939236	RUNX1 regulates transcription of genes involved in differentiation of HSCs	17	96	0.0018	ENSP00000216802,ENSP00000261245,ENSP00000293362,ENSP00000309474,ENSP00000310129,ENSP00000310572,ENSP00000332194,ENSP00000348442,ENSP00000358151,ENSP00000366618,ENSP00000367545,ENSP00000391211,ENSP00000401802,ENSP00000434024,ENSP00000436786,ENSP00000476136,ENSP00000481029	H2AFX,HIST1H2BJ,HIST1H2BL,HIST2H2AC,HIST2H2BE,KMT2A,MNAT1,PSMC2,PSMC3,PSMC5,PSMC6,PSMD1,PSMD12,PSMD2,PSME2,PSME3,TP73
HSA-8941326	RUNX2 regulates bone development	9	30	0.0018	ENSP00000232424,ENSP00000263025,ENSP00000264606,ENSP00000267163,ENSP00000302967,ENSP00000311747,ENSP00000334061,ENSP00000357348,ENSP00000363822	AR,HDAC3,HDAC4,HDAC6,HES1,HEY2,MAPK3,RB1,RBM14
HSA-9022692	Regulation of MECP2 expression and activity	9	30	0.0018	ENSP00000268712,ENSP00000302967,ENSP00000362300,ENSP00000362649,ENSP00000385571,ENSP00000387699,ENSP00000399797,ENSP00000405574,ENSP00000430432	AGO1,CREB1,HDAC1,HDAC2,HDAC3,HIPK2,MOV10,NCOR1,TBL1XR1
HSA-3371599	Defective HLCS causes multiple carboxylase deficiency	5	7	0.0019	ENSP00000265594,ENSP00000343657,ENSP00000365462,ENSP00000377532,ENSP00000483300	ACACA,MCCC1,MCCC2,PC,PCCA
HSA-6798695	Neutrophil degranulation	51	471	0.0019	ENSP00000053867,ENSP00000211998,ENSP00000216392,ENSP00000216962,ENSP00000226574,ENSP00000228740,ENSP00000231751,ENSP00000249923,ENSP00000253792,ENSP00000268182,ENSP00000286788,ENSP00000290158,ENSP00000299300,ENSP00000307940,ENSP00000309474,ENSP00000310129,ENSP00000316476,ENSP00000321584,ENSP00000335153,ENSP00000339063,ENSP00000340648,ENSP00000346032,ENSP00000346437,ENSP00000348442,ENSP00000348965…	ACLY,ACTR2,ANXA2,ATG7,CAP1,CAPN1,CCT2,CCT8,COPB1,CSNK2B,DEGS1,DSP,DYNC1H1,EEF1A1,EEF2,GDI2,GRN,GSTP1,HSP90AA1,HSPA1A,HSPA8,HUWE1,IGF2R,ILF2,IMPDH2,IQGAP1,KCNAB2,KPNB1,LTA4H,LTF,MVP,NFKB1,PGAM1,PNP,PRDX4,PSMC2,PSMC3,PSMD1,PSMD12,PSMD2,PYGB,PYGL,RAP1A,S100A8,S100A9,SPTAN1,UBR4,VCL,VCP,XRCC5,XRCC6
HSA-179409	APC-Cdc20 mediated degradation of Nek2A	8	24	0.002	ENSP00000287598,ENSP00000339109,ENSP00000361540,ENSP00000363019,ENSP00000378350,ENSP00000394394,ENSP00000434614,ENSP00000439403	ANAPC1,ANAPC15,ANAPC7,BUB1B,CDC20,CDC23,CDC27,UBE2D1
HSA-3371511	HSF1 activation	6	12	0.002	ENSP00000264335,ENSP00000334061,ENSP00000335153,ENSP00000339063,ENSP00000351777,ENSP00000431512	EEF1A1,HDAC6,HSF1,HSP90AA1,VCP,YWHAE
HSA-73817	Purine ribonucleoside monophosphate biosynthesis	6	12	0.002	ENSP00000236959,ENSP00000313490,ENSP00000321584,ENSP00000371253,ENSP00000382595,ENSP00000419851	ATIC,GART,GMPS,IMPDH2,PAICS,PFAS
HSA-2173789	TGF-beta receptor signaling activates SMADs	9	31	0.0021	ENSP00000219548,ENSP00000250495,ENSP00000262158,ENSP00000264033,ENSP00000326031,ENSP00000341779,ENSP00000378769,ENSP00000383003,ENSP00000384863	CBL,FKBP1A,NEDD8,PPP1CA,PPP1CB,PPP1CC,SMAD7,STUB1,XPO1
HSA-389661	Glyoxylate metabolism and glycine degradation	9	31	0.0021	ENSP00000205402,ENSP00000222673,ENSP00000227868,ENSP00000269980,ENSP00000280346,ENSP00000307241,ENSP00000335304,ENSP00000359151,ENSP00000369134	BCKDHA,DBT,DLAT,DLD,DLST,OGDH,PDHA1,PDHB,PDHX
HSA-4641258	Degradation of DVL	12	54	0.0021	ENSP00000005340,ENSP00000216802,ENSP00000293362,ENSP00000309474,ENSP00000310129,ENSP00000310572,ENSP00000316054,ENSP00000348442,ENSP00000368169,ENSP00000391211,ENSP00000401802,ENSP00000481029	DVL1,DVL2,DVL3,PSMC2,PSMC3,PSMC5,PSMC6,PSMD1,PSMD12,PSMD2,PSME2,PSME3
HSA-4086400	PCP/CE pathway	16	89	0.0022	ENSP00000005340,ENSP00000216802,ENSP00000219255,ENSP00000293362,ENSP00000309474,ENSP00000310129,ENSP00000310572,ENSP00000316054,ENSP00000348442,ENSP00000368169,ENSP00000391211,ENSP00000401802,ENSP00000403701,ENSP00000479606,ENSP00000481029,ENSP00000482835	AP2B1,ARRB2,CLTC,DVL1,DVL2,DVL3,PARD6A,PSMC2,PSMC3,PSMC5,PSMC6,PSMD1,PSMD12,PSMD2,PSME2,PSME3
HSA-8854518	AURKA Activation by TPX2	14	71	0.0022	ENSP00000216911,ENSP00000248437,ENSP00000264071,ENSP00000264335,ENSP00000301071,ENSP00000324804,ENSP00000327077,ENSP00000335153,ENSP00000348965,ENSP00000352572,ENSP00000378699,ENSP00000393583,ENSP00000403453,ENSP00000432768	AURKA,CDK1,CEP131,CKAP5,DYNC1H1,HSP90AA1,ODF2,PCM1,PCNT,PPP2R1A,TUBA1A,TUBA4A,TUBB4A,YWHAE
HSA-157579	Telomere Maintenance	13	63	0.0023	ENSP00000263681,ENSP00000267415,ENSP00000318297,ENSP00000322570,ENSP00000332194,ENSP00000358151,ENSP00000366618,ENSP00000368349,ENSP00000371321,ENSP00000434024,ENSP00000473172,ENSP00000476136,ENSP00000480186	H2AFX,HIST1H2BJ,HIST1H2BL,HIST2H2AC,HIST2H2BE,POLA1,POLD2,POLD3,POLE,RFC1,RUVBL1,RUVBL2,TINF2
HSA-157858	Gap junction trafficking and regulation	11	47	0.0024	ENSP00000217133,ENSP00000248437,ENSP00000264071,ENSP00000281537,ENSP00000301071,ENSP00000301072,ENSP00000320295,ENSP00000369703,ENSP00000373905,ENSP00000456206,ENSP00000479606	CLTC,DNM2,ENSG00000258947,TJP1,TUBA1A,TUBA1C,TUBA4A,TUBB1,TUBB2A,TUBB4A,TUBB8
HSA-429914	Deadenylation-dependent mRNA decay	12	55	0.0024	ENSP00000264951,ENSP00000293831,ENSP00000313007,ENSP00000320949,ENSP00000351596,ENSP00000351811,ENSP00000364543,ENSP00000365130,ENSP00000366997,ENSP00000387911,ENSP00000416255,ENSP00000437271	CNOT1,DIS3,EDC4,EIF4A1,EIF4G1,PABPC1,PARN,SKIV2L,TNKS1BP1,TTC37,XRN1,ZCCHC6
HSA-912446	Meiotic recombination	12	55	0.0024	ENSP00000216024,ENSP00000265433,ENSP00000266970,ENSP00000278616,ENSP00000325863,ENSP00000332194,ENSP00000347232,ENSP00000358151,ENSP00000366618,ENSP00000368100,ENSP00000434024,ENSP00000476136	ATM,BLM,CDK2,DMC1,H2AFX,HIST1H2BJ,HIST1H2BL,HIST2H2AC,HIST2H2BE,MRE11A,NBN,RAD50
HSA-1268020	Mitochondrial protein import	13	64	0.0026	ENSP00000216027,ENSP00000249269,ENSP00000262030,ENSP00000265333,ENSP00000297185,ENSP00000360782,ENSP00000370377,ENSP00000370808,ENSP00000373620,ENSP00000378812,ENSP00000381736,ENSP00000400101,ENSP00000410339	ATP5A1,ATP5B,CHCHD2,HSCB,HSPA9,HSPD1,PITRM1,PMPCA,PMPCB,SLC25A13,SLC25A6,TOMM40,VDAC1
HSA-1362277	Transcription of E2F targets under negative control by DREAM complex	7	19	0.0027	ENSP00000262133,ENSP00000345571,ENSP00000351490,ENSP00000362592,ENSP00000362649,ENSP00000362768,ENSP00000479618	E2F1,HDAC1,MAX,MYC,RBBP4,RBL1,RBL2
HSA-8852135	Protein ubiquitination	14	73	0.0027	ENSP00000229268,ENSP00000263228,ENSP00000313420,ENSP00000316176,ENSP00000316357,ENSP00000325677,ENSP00000343535,ENSP00000346986,ENSP00000349016,ENSP00000351777,ENSP00000363019,ENSP00000366618,ENSP00000373772,ENSP00000476136	HIST1H2BJ,HIST1H2BL,PEX14,PRKDC,RNF20,RNF40,UBE2D1,UBE2N,UBE2R2,USP5,USP7,USP9X,VCP,WAC
HSA-5685942	HDR through Homologous Recombination (HRR)	13	65	0.0029	ENSP00000263681,ENSP00000265433,ENSP00000278616,ENSP00000298139,ENSP00000311360,ENSP00000322570,ENSP00000325863,ENSP00000340330,ENSP00000347232,ENSP00000361310,ENSP00000368100,ENSP00000371321,ENSP00000480186	ATM,BLM,KAT5,MRE11A,NBN,POLD2,POLD3,POLE,POLH,RAD50,RAD9A,RFC1,WRN
HSA-2559585	Oncogene Induced Senescence	9	33	0.003	ENSP00000258149,ENSP00000263025,ENSP00000265734,ENSP00000267163,ENSP00000269305,ENSP00000329357,ENSP00000345571,ENSP00000362300,ENSP00000399797	AGO1,CDK6,E2F1,MAPK3,MDM2,MOV10,RB1,SP1,TP53
HSA-187577	SCF(Skp2)-mediated degradation of p27/p21	12	57	0.0031	ENSP00000216802,ENSP00000228872,ENSP00000266970,ENSP00000274255,ENSP00000293362,ENSP00000309474,ENSP00000310129,ENSP00000310572,ENSP00000348442,ENSP00000391211,ENSP00000401802,ENSP00000481029	CDK2,CDKN1B,PSMC2,PSMC3,PSMC5,PSMC6,PSMD1,PSMD12,PSMD2,PSME2,PSME3,SKP2
HSA-349425	Autodegradation of the E3 ubiquitin ligase COP1	11	49	0.0032	ENSP00000216802,ENSP00000269305,ENSP00000278616,ENSP00000293362,ENSP00000309474,ENSP00000310129,ENSP00000310572,ENSP00000348442,ENSP00000391211,ENSP00000401802,ENSP00000481029	ATM,PSMC2,PSMC3,PSMC5,PSMC6,PSMD1,PSMD12,PSMD2,PSME2,PSME3,TP53
HSA-3899300	SUMOylation of transcription cofactors	10	41	0.0032	ENSP00000249636,ENSP00000253024,ENSP00000262971,ENSP00000263253,ENSP00000264867,ENSP00000296930,ENSP00000307183,ENSP00000348056,ENSP00000376765,ENSP00000385571	EP300,HIPK2,ING2,NPM1,PIAS1,PIAS3,PIAS4,PPARGC1A,TRIM28,UBE2I
HSA-5696400	Dual Incision in GG-NER	10	41	0.0032	ENSP00000250416,ENSP00000263681,ENSP00000301764,ENSP00000322570,ENSP00000355759,ENSP00000364270,ENSP00000364589,ENSP00000371321,ENSP00000384109,ENSP00000480186	CUL4A,CUL4B,DDB1,PARP1,PARP2,POLD2,POLD3,POLE,RFC1,XPA
HSA-73893	DNA Damage Bypass	11	49	0.0032	ENSP00000263681,ENSP00000301764,ENSP00000322570,ENSP00000323889,ENSP00000351777,ENSP00000361310,ENSP00000364589,ENSP00000371321,ENSP00000384109,ENSP00000457411,ENSP00000480186	CUL4A,CUL4B,DDB1,POLD2,POLD3,POLE,POLH,RFC1,TRIM25,USP10,VCP
HSA-9609507	Protein localization	19	122	0.0032	ENSP00000216027,ENSP00000221418,ENSP00000249269,ENSP00000262030,ENSP00000265333,ENSP00000265986,ENSP00000297185,ENSP00000316357,ENSP00000349016,ENSP00000360782,ENSP00000363019,ENSP00000363614,ENSP00000370377,ENSP00000370808,ENSP00000373620,ENSP00000378812,ENSP00000381736,ENSP00000400101,ENSP00000410339	ATP5A1,ATP5B,CHCHD2,ECH1,HMGCL,HSCB,HSPA9,HSPD1,IDE,PEX14,PITRM1,PMPCA,PMPCB,SLC25A13,SLC25A6,TOMM40,UBE2D1,USP9X,VDAC1
HSA-983231	Factors involved in megakaryocyte development and platelet production	22	153	0.0033	ENSP00000217133,ENSP00000248437,ENSP00000251157,ENSP00000260363,ENSP00000263168,ENSP00000264071,ENSP00000266970,ENSP00000267615,ENSP00000269305,ENSP00000301071,ENSP00000301072,ENSP00000307078,ENSP00000320295,ENSP00000362649,ENSP00000363524,ENSP00000369703,ENSP00000383042,ENSP00000401010,ENSP00000420617,ENSP00000430432,ENSP00000438388,ENSP00000456206	CAPZA1,CAPZB,CDK2,DOCK7,ENSG00000258947,HDAC1,HDAC2,ITPK1,KDM1A,KIF1A,KIF23,KIF4A,KIF5B,MFN1,TP53,TUBA1A,TUBA1C,TUBA4A,TUBB1,TUBB2A,TUBB4A,TUBB8
HSA-389977	Post-chaperonin tubulin folding pathway	7	20	0.0034	ENSP00000217133,ENSP00000248437,ENSP00000264071,ENSP00000301071,ENSP00000301072,ENSP00000320295,ENSP00000369703	ENSG00000258947,TUBA1A,TUBA1C,TUBA4A,TUBB1,TUBB2A,TUBB4A
HSA-8941856	RUNX3 regulates NOTCH signaling	6	14	0.0034	ENSP00000225916,ENSP00000232424,ENSP00000261531,ENSP00000263253,ENSP00000263754,ENSP00000382800	EP300,HES1,KAT2A,KAT2B,RUNX3,SNW1
HSA-8986944	Transcriptional Regulation by MECP2	12	58	0.0034	ENSP00000263708,ENSP00000268712,ENSP00000287820,ENSP00000302967,ENSP00000340874,ENSP00000362300,ENSP00000362649,ENSP00000385571,ENSP00000387699,ENSP00000399797,ENSP00000405574,ENSP00000430432	AGO1,CREB1,HDAC1,HDAC2,HDAC3,HIPK2,MEF2C,MOV10,NCOR1,PPARG,PTPN4,TBL1XR1
HSA-9013695	NOTCH4 Intracellular Domain Regulates Transcription	7	20	0.0034	ENSP00000225916,ENSP00000232424,ENSP00000261531,ENSP00000263253,ENSP00000263754,ENSP00000357348,ENSP00000367714	EP300,HES1,HES5,HEY2,KAT2A,KAT2B,SNW1
HSA-983189	Kinesins	12	58	0.0034	ENSP00000217133,ENSP00000248437,ENSP00000260363,ENSP00000264071,ENSP00000301071,ENSP00000301072,ENSP00000307078,ENSP00000320295,ENSP00000363524,ENSP00000369703,ENSP00000438388,ENSP00000456206	ENSG00000258947,KIF1A,KIF23,KIF4A,KIF5B,TUBA1A,TUBA1C,TUBA4A,TUBB1,TUBB2A,TUBB4A,TUBB8
HSA-187037	Signaling by NTRK1 (TRKA)	14	76	0.0036	ENSP00000178640,ENSP00000263025,ENSP00000264657,ENSP00000304895,ENSP00000324804,ENSP00000340874,ENSP00000358723,ENSP00000365016,ENSP00000373905,ENSP00000387699,ENSP00000401303,ENSP00000428056,ENSP00000479606,ENSP00000482835	AP2B1,CLTC,CREB1,DNM2,IRS1,IRS2,MAP2K5,MAPK3,MEF2C,PIK3R1,PPP2R1A,RAP1A,SHC1,STAT3
HSA-5205647	Mitophagy	8	27	0.0036	ENSP00000217244,ENSP00000262506,ENSP00000265333,ENSP00000268607,ENSP00000358072,ENSP00000365042,ENSP00000410339,ENSP00000420617	ATG5,CSNK2A1,CSNK2A2,CSNK2B,MAP1LC3B,MFN1,TOMM40,VDAC1
HSA-5218920	VEGFR2 mediated vascular permeability	8	27	0.0036	ENSP00000296782,ENSP00000297494,ENSP00000304669,ENSP00000335153,ENSP00000344456,ENSP00000354558,ENSP00000357804,ENSP00000451828	AKT1,CTNNA1,CTNNB1,HSP90AA1,MTOR,NOS3,RICTOR,THEM4
HSA-69601	Ubiquitin Mediated Degradation of Phosphorylated Cdc25A	11	50	0.0036	ENSP00000216802,ENSP00000278616,ENSP00000293362,ENSP00000309474,ENSP00000310129,ENSP00000310572,ENSP00000348442,ENSP00000372023,ENSP00000391211,ENSP00000401802,ENSP00000481029	ATM,CHEK2,PSMC2,PSMC3,PSMC5,PSMC6,PSMD1,PSMD12,PSMD2,PSME2,PSME3
HSA-168164	Toll Like Receptor 3 (TLR3) Cascade	16	95	0.0037	ENSP00000216274,ENSP00000226574,ENSP00000259808,ENSP00000263025,ENSP00000284981,ENSP00000306245,ENSP00000316176,ENSP00000324804,ENSP00000340874,ENSP00000359206,ENSP00000360266,ENSP00000363019,ENSP00000378974,ENSP00000384273,ENSP00000387699,ENSP00000410402	APP,BTRC,CREB1,FOS,JUN,MAP2K4,MAPK3,MAPK8,MEF2C,NFKB1,PPP2R1A,RELA,RIPK1,RIPK3,UBE2D1,UBE2N
HSA-6802952	Signaling by BRAF and RAF fusions	12	59	0.0038	ENSP00000211998,ENSP00000242351,ENSP00000263025,ENSP00000268182,ENSP00000316029,ENSP00000346437,ENSP00000346762,ENSP00000350170,ENSP00000357283,ENSP00000358723,ENSP00000389715,ENSP00000403701	ARRB2,ATG7,FXR1,IQGAP1,KSR2,LMNA,MAPK3,RAP1A,SND1,TLN1,VCL,ZC3HAV1
HSA-8934903	Receptor Mediated Mitophagy	5	9	0.0038	ENSP00000217244,ENSP00000262506,ENSP00000268607,ENSP00000358072,ENSP00000365042	ATG5,CSNK2A1,CSNK2A2,CSNK2B,MAP1LC3B
HSA-380259	Loss of Nlp from mitotic centrosomes	13	68	0.0039	ENSP00000248437,ENSP00000264071,ENSP00000264335,ENSP00000301071,ENSP00000324804,ENSP00000327077,ENSP00000335153,ENSP00000348965,ENSP00000352572,ENSP00000378699,ENSP00000393583,ENSP00000403453,ENSP00000432768	CDK1,CEP131,CKAP5,DYNC1H1,HSP90AA1,ODF2,PCM1,PCNT,PPP2R1A,TUBA1A,TUBA4A,TUBB4A,YWHAE
HSA-379726	Mitochondrial tRNA aminoacylation	7	21	0.0041	ENSP00000244571,ENSP00000325448,ENSP00000343885,ENSP00000355889,ENSP00000358549,ENSP00000373918,ENSP00000472847	AARS2,GARS,IARS2,KARS,PPA2,RARS2,SARS2
HSA-937061	TRIF(TICAM1)-mediated TLR4 signaling	16	96	0.0041	ENSP00000216274,ENSP00000226574,ENSP00000259808,ENSP00000263025,ENSP00000284981,ENSP00000306245,ENSP00000316176,ENSP00000324804,ENSP00000340874,ENSP00000359206,ENSP00000360266,ENSP00000363019,ENSP00000378974,ENSP00000384273,ENSP00000387699,ENSP00000410402	APP,BTRC,CREB1,FOS,JUN,MAP2K4,MAPK3,MAPK8,MEF2C,NFKB1,PPP2R1A,RELA,RIPK1,RIPK3,UBE2D1,UBE2N
HSA-1445148	Translocation of SLC2A4 (GLUT4) to the plasma membrane	13	69	0.0044	ENSP00000216181,ENSP00000217133,ENSP00000248437,ENSP00000264071,ENSP00000264335,ENSP00000301071,ENSP00000301072,ENSP00000320295,ENSP00000352834,ENSP00000369703,ENSP00000382177,ENSP00000451828,ENSP00000456206	AKT1,ENSG00000258947,MYH9,MYO1C,MYO5A,TUBA1A,TUBA1C,TUBA4A,TUBB1,TUBB2A,TUBB4A,TUBB8,YWHAE
HSA-5684996	MAPK1/MAPK3 signaling	29	234	0.0045	ENSP00000211998,ENSP00000216802,ENSP00000263025,ENSP00000264664,ENSP00000268182,ENSP00000293362,ENSP00000304895,ENSP00000309474,ENSP00000310129,ENSP00000310572,ENSP00000316029,ENSP00000324804,ENSP00000343204,ENSP00000348442,ENSP00000349259,ENSP00000351015,ENSP00000358723,ENSP00000361824,ENSP00000365016,ENSP00000368797,ENSP00000378699,ENSP00000389715,ENSP00000391211,ENSP00000401303,ENSP00000401802…	ARRB2,CDK1,FGF10,IQGAP1,IRS1,IRS2,JAK1,KBTBD7,KSR2,MAPK3,NEFL,NF1,PPP2R1A,PSMC2,PSMC3,PSMC5,PSMC6,PSMD1,PSMD12,PSMD2,PSME2,PSME3,RAP1A,SHC1,SPTAN1,SPTBN1,SPTBN2,TLN1,VCL
HSA-5389840	Mitochondrial translation elongation	15	88	0.0046	ENSP00000199706,ENSP00000254630,ENSP00000258383,ENSP00000258455,ENSP00000259873,ENSP00000305682,ENSP00000308275,ENSP00000315017,ENSP00000320184,ENSP00000322439,ENSP00000354086,ENSP00000357320,ENSP00000418008,ENSP00000424328,ENSP00000449884	DAP3,MRPL1,MRPL28,MRPL37,MRPL38,MRPL39,MRPL42,MRPL44,MRPS18B,MRPS22,MRPS23,MRPS30,MRPS9,PTCD3,TUFM
HSA-168249	Innate Immune System	91	1012	0.0048	ENSP00000053867,ENSP00000211998,ENSP00000216181,ENSP00000216274,ENSP00000216392,ENSP00000216802,ENSP00000216962,ENSP00000226574,ENSP00000228740,ENSP00000231751,ENSP00000249923,ENSP00000253792,ENSP00000259808,ENSP00000263025,ENSP00000263168,ENSP00000263238,ENSP00000263253,ENSP00000263708,ENSP00000264350,ENSP00000268182,ENSP00000284981,ENSP00000286788,ENSP00000290158,ENSP00000293362,ENSP00000297494…	ACLY,ACTR2,ACTR3,ANXA2,APP,ATG5,ATG7,BTRC,CAP1,CAPN1,CAPZA1,CCT2,CCT8,COPB1,CREB1,CSNK2B,CTNNB1,DEGS1,DHX36,DNM2,DSP,DYNC1H1,EEF1A1,EEF2,EP300,FOS,GDI2,GRN,GSTP1,HERC5,HSP90AA1,HSP90B1,HSPA1A,HSPA8,HUWE1,IGF2R,ILF2,IMPDH2,IQGAP1,ITPR3,JUN,KCNAB2,KPNB1,LTA4H,LTF,MAP2K4,MAPK3,MAPK8,MEF2C,MRE11A,MVP,MYH9,MYO1C,MYO5A,NCKAP1,NFKB1,NLRX1,NOS3,PGAM1,PIK3R1,PNP,PPP2R1A,PRDX4,PRKDC,PSMC2,PSMC3,PSMC5,PSMC6…
HSA-195253	Degradation of beta-catenin by the destruction complex	14	79	0.0048	ENSP00000216802,ENSP00000293362,ENSP00000309474,ENSP00000310129,ENSP00000310572,ENSP00000324804,ENSP00000344456,ENSP00000348442,ENSP00000359206,ENSP00000362649,ENSP00000365682,ENSP00000391211,ENSP00000401802,ENSP00000481029	BTRC,CTNNB1,HDAC1,PPP2R1A,PSMC2,PSMC3,PSMC5,PSMC6,PSMD1,PSMD12,PSMD2,PSME2,PSME3,TLE1
HSA-2871837	FCERI mediated NF-kB activation	14	79	0.0048	ENSP00000216802,ENSP00000226574,ENSP00000293362,ENSP00000309474,ENSP00000310129,ENSP00000310572,ENSP00000316176,ENSP00000348442,ENSP00000359206,ENSP00000363019,ENSP00000384273,ENSP00000391211,ENSP00000401802,ENSP00000481029	BTRC,NFKB1,PSMC2,PSMC3,PSMC5,PSMC6,PSMD1,PSMD12,PSMD2,PSME2,PSME3,RELA,UBE2D1,UBE2N
HSA-113510	E2F mediated regulation of DNA replication	7	22	0.005	ENSP00000234296,ENSP00000256442,ENSP00000267163,ENSP00000324804,ENSP00000345571,ENSP00000368349,ENSP00000378699	CCNB1,CDK1,E2F1,ORC2,POLA1,PPP2R1A,RB1
HSA-202424	Downstream TCR signaling	15	89	0.0051	ENSP00000216802,ENSP00000226574,ENSP00000293362,ENSP00000309474,ENSP00000310129,ENSP00000310572,ENSP00000316176,ENSP00000348442,ENSP00000359206,ENSP00000363019,ENSP00000384273,ENSP00000391211,ENSP00000401802,ENSP00000428056,ENSP00000481029	BTRC,NFKB1,PIK3R1,PSMC2,PSMC3,PSMC5,PSMC6,PSMD1,PSMD12,PSMD2,PSME2,PSME3,RELA,UBE2D1,UBE2N
HSA-198693	AKT phosphorylates targets in the nucleus	5	10	0.0052	ENSP00000363377,ENSP00000368880,ENSP00000385824,ENSP00000387699,ENSP00000451828	AKT1,CREB1,FOXO1,FOXO3,FOXO4
HSA-390450	Folding of actin by CCT/TriC	5	10	0.0052	ENSP00000280326,ENSP00000286788,ENSP00000295688,ENSP00000299300,ENSP00000317334	CCT2,CCT3,CCT5,CCT8,TCP1
HSA-5685939	HDR through MMEJ (alt-NHEJ)	5	10	0.0052	ENSP00000250416,ENSP00000265433,ENSP00000325863,ENSP00000355759,ENSP00000368100	MRE11A,NBN,PARP1,PARP2,RAD50
HSA-1362300	Transcription of E2F targets under negative control by p107 (RBL1) and p130 (RBL2) in complex with HDAC1	6	16	0.0055	ENSP00000262133,ENSP00000345571,ENSP00000362592,ENSP00000362649,ENSP00000362768,ENSP00000378699	CDK1,E2F1,HDAC1,RBBP4,RBL1,RBL2
HSA-2559584	Formation of Senescence-Associated Heterochromatin Foci (SAHF)	6	16	0.0055	ENSP00000244534,ENSP00000244573,ENSP00000267163,ENSP00000269305,ENSP00000307705,ENSP00000330074	HIST1H1A,HIST1H1B,HIST1H1D,HIST1H1E,RB1,TP53
HSA-3858494	Beta-catenin independent WNT signaling	20	140	0.0055	ENSP00000005340,ENSP00000216802,ENSP00000219255,ENSP00000293362,ENSP00000309474,ENSP00000310129,ENSP00000310572,ENSP00000316054,ENSP00000344456,ENSP00000348442,ENSP00000362300,ENSP00000363435,ENSP00000368169,ENSP00000391211,ENSP00000399797,ENSP00000401802,ENSP00000403701,ENSP00000479606,ENSP00000481029,ENSP00000482835	AGO1,AP2B1,ARRB2,CLTC,CTNNB1,DVL1,DVL2,DVL3,ITPR3,MOV10,PARD6A,PSMC2,PSMC3,PSMC5,PSMC6,PSMD1,PSMD12,PSMD2,PSME2,PSME3
HSA-168898	Toll-like Receptor Cascades	21	151	0.0057	ENSP00000216274,ENSP00000226574,ENSP00000259808,ENSP00000263025,ENSP00000263708,ENSP00000284981,ENSP00000299767,ENSP00000306245,ENSP00000316176,ENSP00000324804,ENSP00000340874,ENSP00000357722,ENSP00000357727,ENSP00000359206,ENSP00000360266,ENSP00000363019,ENSP00000373905,ENSP00000378974,ENSP00000384273,ENSP00000387699,ENSP00000410402	APP,BTRC,CREB1,DNM2,FOS,HSP90B1,JUN,MAP2K4,MAPK3,MAPK8,MEF2C,NFKB1,PPP2R1A,PTPN4,RELA,RIPK1,RIPK3,S100A8,S100A9,UBE2D1,UBE2N
HSA-70268	Pyruvate metabolism	8	30	0.0058	ENSP00000205402,ENSP00000227868,ENSP00000265333,ENSP00000280346,ENSP00000307241,ENSP00000369134,ENSP00000376352,ENSP00000379503	DLAT,DLD,PDHA1,PDHB,PDHX,PDK1,PDP1,VDAC1
HSA-5625740	RHO GTPases activate PKNs	12	63	0.0059	ENSP00000216181,ENSP00000264335,ENSP00000332194,ENSP00000353590,ENSP00000358151,ENSP00000363822,ENSP00000366618,ENSP00000378769,ENSP00000383042,ENSP00000434024,ENSP00000470298,ENSP00000476136	AR,H2AFX,HIST1H2BJ,HIST1H2BL,HIST2H2AC,HIST2H2BE,KDM1A,MYH10,MYH14,MYH9,PPP1CB,YWHAE
HSA-190828	Gap junction trafficking	10	46	0.006	ENSP00000217133,ENSP00000248437,ENSP00000264071,ENSP00000301071,ENSP00000301072,ENSP00000320295,ENSP00000369703,ENSP00000373905,ENSP00000456206,ENSP00000479606	CLTC,DNM2,ENSG00000258947,TUBA1A,TUBA1C,TUBA4A,TUBB1,TUBB2A,TUBB4A,TUBB8
HSA-8940973	RUNX2 regulates osteoblast differentiation	7	23	0.006	ENSP00000232424,ENSP00000263025,ENSP00000267163,ENSP00000302967,ENSP00000334061,ENSP00000357348,ENSP00000363822	AR,HDAC3,HDAC6,HES1,HEY2,MAPK3,RB1
HSA-5696394	DNA Damage Recognition in GG-NER	9	38	0.0061	ENSP00000250416,ENSP00000264389,ENSP00000285021,ENSP00000301764,ENSP00000318297,ENSP00000350512,ENSP00000355759,ENSP00000364589,ENSP00000384109	COPS4,COPS5,CUL4A,CUL4B,DDB1,PARP1,PARP2,RUVBL1,XPC
HSA-446203	Asparagine N-linked glycosylation	34	298	0.0062	ENSP00000217133,ENSP00000237530,ENSP00000247461,ENSP00000248437,ENSP00000249923,ENSP00000253778,ENSP00000256682,ENSP00000259253,ENSP00000263168,ENSP00000264071,ENSP00000301071,ENSP00000301072,ENSP00000306881,ENSP00000320295,ENSP00000320866,ENSP00000325002,ENSP00000325827,ENSP00000329419,ENSP00000340466,ENSP00000343405,ENSP00000348965,ENSP00000349259,ENSP00000349860,ENSP00000351777,ENSP00000357048…	ANKRD28,ARF3,CALR,CANX,CAPZA1,CAPZB,COPA,COPB1,COPB2,COPG1,COPG2,DYNC1H1,ENSG00000258947,GANAB,GFPT1,GFPT2,PPP6R3,RPN2,SEC13,SEC16A,SEC23A,SEC24C,SPTAN1,SPTBN1,SPTBN2,TUBA1A,TUBA1C,TUBA4A,TUBB1,TUBB2A,TUBB4A,TUBB8,UGGT1,VCP
HSA-5673001	RAF/MAP kinase cascade	28	229	0.0062	ENSP00000211998,ENSP00000216802,ENSP00000263025,ENSP00000264664,ENSP00000268182,ENSP00000293362,ENSP00000304895,ENSP00000309474,ENSP00000310129,ENSP00000310572,ENSP00000316029,ENSP00000324804,ENSP00000343204,ENSP00000348442,ENSP00000349259,ENSP00000351015,ENSP00000358723,ENSP00000361824,ENSP00000365016,ENSP00000368797,ENSP00000389715,ENSP00000391211,ENSP00000401303,ENSP00000401802,ENSP00000403701…	ARRB2,FGF10,IQGAP1,IRS1,IRS2,JAK1,KBTBD7,KSR2,MAPK3,NEFL,NF1,PPP2R1A,PSMC2,PSMC3,PSMC5,PSMC6,PSMD1,PSMD12,PSMD2,PSME2,PSME3,RAP1A,SHC1,SPTAN1,SPTBN1,SPTBN2,TLN1,VCL
HSA-1169091	Activation of NF-kappaB in B cells	12	64	0.0065	ENSP00000216802,ENSP00000226574,ENSP00000293362,ENSP00000309474,ENSP00000310129,ENSP00000310572,ENSP00000348442,ENSP00000359206,ENSP00000384273,ENSP00000391211,ENSP00000401802,ENSP00000481029	BTRC,NFKB1,PSMC2,PSMC3,PSMC5,PSMC6,PSMD1,PSMD12,PSMD2,PSME2,PSME3,RELA
HSA-6811442	Intra-Golgi and retrograde Golgi-to-ER traffic	25	197	0.0067	ENSP00000217133,ENSP00000248437,ENSP00000249923,ENSP00000256682,ENSP00000260363,ENSP00000263168,ENSP00000264071,ENSP00000301071,ENSP00000301072,ENSP00000307078,ENSP00000320295,ENSP00000325002,ENSP00000329419,ENSP00000348965,ENSP00000349437,ENSP00000351832,ENSP00000356436,ENSP00000357048,ENSP00000363524,ENSP00000369703,ENSP00000401010,ENSP00000402346,ENSP00000411418,ENSP00000438388,ENSP00000456206	ARF3,CAPZA1,CAPZB,COPA,COPB1,COPB2,COPG1,COPG2,DYNC1H1,ENSG00000258947,IGF2R,KIF1A,KIF23,KIF4A,KIF5B,PLA2G4A,RAB3GAP1,RAB3GAP2,TUBA1A,TUBA1C,TUBA4A,TUBB1,TUBB2A,TUBB4A,TUBB8
HSA-196780	Biotin transport and metabolism	5	11	0.0069	ENSP00000265594,ENSP00000343657,ENSP00000365462,ENSP00000377532,ENSP00000483300	ACACA,MCCC1,MCCC2,PC,PCCA
HSA-163200	Respiratory electron transport, ATP synthesis by chemiosmotic coupling, and heat production by uncoupling proteins.	18	123	0.007	ENSP00000203407,ENSP00000215375,ENSP00000233627,ENSP00000246957,ENSP00000252711,ENSP00000260665,ENSP00000262030,ENSP00000264932,ENSP00000266544,ENSP00000268379,ENSP00000309565,ENSP00000312618,ENSP00000322450,ENSP00000356972,ENSP00000364649,ENSP00000381736,ENSP00000392709,ENSP00000452762	ACAD9,ATP5A1,ATP5B,ATP5D,ETFA,LRPPRC,NDUFA10,NDUFA9,NDUFS1,NDUFS2,NDUFS7,NDUFV1,SDHA,SDHB,TRAP1,UQCRC1,UQCRC2,UQCRH
HSA-186712	Regulation of beta-cell development	9	39	0.007	ENSP00000225916,ENSP00000232424,ENSP00000257555,ENSP00000261531,ENSP00000263253,ENSP00000263754,ENSP00000264664,ENSP00000368880,ENSP00000451828	AKT1,EP300,FGF10,FOXO1,HES1,HNF1A,KAT2A,KAT2B,SNW1
HSA-5689603	UCH proteinases	15	93	0.007	ENSP00000216802,ENSP00000250495,ENSP00000262158,ENSP00000293362,ENSP00000309474,ENSP00000309555,ENSP00000310129,ENSP00000310572,ENSP00000318297,ENSP00000332194,ENSP00000332790,ENSP00000348442,ENSP00000391211,ENSP00000401802,ENSP00000481029	HCFC1,HIST2H2AB,HIST2H2AC,NEDD8,PSMC2,PSMC3,PSMC5,PSMC6,PSMD1,PSMD12,PSMD2,PSME2,PSME3,RUVBL1,SMAD7
HSA-8955332	Carboxyterminal post-translational modifications of tubulin	9	39	0.007	ENSP00000216129,ENSP00000217133,ENSP00000248437,ENSP00000264071,ENSP00000301071,ENSP00000301072,ENSP00000320295,ENSP00000369703,ENSP00000456206	ENSG00000258947,TTLL12,TUBA1A,TUBA1C,TUBA4A,TUBB1,TUBB2A,TUBB4A,TUBB8
HSA-176417	Phosphorylation of Emi1	4	6	0.0071	ENSP00000256442,ENSP00000361540,ENSP00000378529,ENSP00000378699	CCNB1,CDC20,CDK1,FZR1
HSA-429947	Deadenylation of mRNA	7	24	0.0071	ENSP00000293831,ENSP00000313007,ENSP00000320949,ENSP00000365130,ENSP00000387911,ENSP00000416255,ENSP00000437271	CNOT1,EIF4A1,EIF4G1,PABPC1,PARN,TNKS1BP1,ZCCHC6
HSA-6796648	TP53 Regulates Transcription of DNA Repair Genes	12	65	0.0071	ENSP00000233146,ENSP00000261245,ENSP00000262809,ENSP00000269305,ENSP00000278616,ENSP00000306245,ENSP00000310842,ENSP00000360266,ENSP00000362361,ENSP00000365588,ENSP00000470252,ENSP00000480158	ATM,CDK9,ELL,FANCI,FOS,JUN,MDC1,MNAT1,MSH2,POLR2A,SUPT5H,TP53
HSA-9013508	NOTCH3 Intracellular Domain Regulates Transcription	7	24	0.0071	ENSP00000225916,ENSP00000232424,ENSP00000261531,ENSP00000263253,ENSP00000263754,ENSP00000357348,ENSP00000367714	EP300,HES1,HES5,HEY2,KAT2A,KAT2B,SNW1
HSA-381119	Unfolded Protein Response (UPR)	15	94	0.0076	ENSP00000175506,ENSP00000299767,ENSP00000316029,ENSP00000320866,ENSP00000324173,ENSP00000349860,ENSP00000357283,ENSP00000364591,ENSP00000366997,ENSP00000381216,ENSP00000387911,ENSP00000401303,ENSP00000438689,ENSP00000438788,ENSP00000480150	ACADVL,ASNS,CALR,CUL7,DIS3,GFPT1,HSP90B1,HSPA5,HYOU1,KHSRP,LMNA,PARN,SHC1,TLN1,TSPYL2
HSA-5607764	CLEC7A (Dectin-1) signaling	15	94	0.0076	ENSP00000216802,ENSP00000226574,ENSP00000293362,ENSP00000309474,ENSP00000310129,ENSP00000310572,ENSP00000316176,ENSP00000348442,ENSP00000359206,ENSP00000363019,ENSP00000363435,ENSP00000384273,ENSP00000391211,ENSP00000401802,ENSP00000481029	BTRC,ITPR3,NFKB1,PSMC2,PSMC3,PSMC5,PSMC6,PSMD1,PSMD12,PSMD2,PSME2,PSME3,RELA,UBE2D1,UBE2N
HSA-6802957	Oncogenic MAPK signaling	13	75	0.0077	ENSP00000211998,ENSP00000242351,ENSP00000263025,ENSP00000268182,ENSP00000316029,ENSP00000346437,ENSP00000346762,ENSP00000350170,ENSP00000351015,ENSP00000357283,ENSP00000358723,ENSP00000389715,ENSP00000403701	ARRB2,ATG7,FXR1,IQGAP1,KSR2,LMNA,MAPK3,NF1,RAP1A,SND1,TLN1,VCL,ZC3HAV1
HSA-5607761	Dectin-1 mediated noncanonical NF-kB signaling	11	57	0.0079	ENSP00000216802,ENSP00000293362,ENSP00000309474,ENSP00000310129,ENSP00000310572,ENSP00000348442,ENSP00000359206,ENSP00000384273,ENSP00000391211,ENSP00000401802,ENSP00000481029	BTRC,PSMC2,PSMC3,PSMC5,PSMC6,PSMD1,PSMD12,PSMD2,PSME2,PSME3,RELA
HSA-5610780	Degradation of GLI1 by the proteasome	11	57	0.0079	ENSP00000216802,ENSP00000228682,ENSP00000293362,ENSP00000309474,ENSP00000310129,ENSP00000310572,ENSP00000348442,ENSP00000359206,ENSP00000391211,ENSP00000401802,ENSP00000481029	BTRC,GLI1,PSMC2,PSMC3,PSMC5,PSMC6,PSMD1,PSMD12,PSMD2,PSME2,PSME3
HSA-8936459	RUNX1 regulates genes involved in megakaryocyte differentiation and platelet function	12	66	0.0079	ENSP00000263253,ENSP00000263754,ENSP00000332194,ENSP00000358151,ENSP00000362300,ENSP00000362649,ENSP00000366618,ENSP00000399797,ENSP00000406162,ENSP00000434024,ENSP00000436786,ENSP00000476136	AGO1,EP300,H2AFX,HDAC1,HIST1H2BJ,HIST1H2BL,HIST2H2AC,HIST2H2BE,KAT2B,KMT2A,MOV10,PRMT1
HSA-110373	Resolution of AP sites via the multiple-nucleotide patch replacement pathway	7	25	0.0084	ENSP00000216714,ENSP00000250416,ENSP00000263681,ENSP00000322570,ENSP00000355759,ENSP00000371321,ENSP00000480186	APEX1,PARP1,PARP2,POLD2,POLD3,POLE,RFC1
HSA-5693554	Resolution of D-loop Structures through Synthesis-Dependent Strand Annealing (SDSA)	7	25	0.0084	ENSP00000265433,ENSP00000278616,ENSP00000298139,ENSP00000325863,ENSP00000340330,ENSP00000347232,ENSP00000368100	ATM,BLM,KAT5,MRE11A,NBN,RAD50,WRN
HSA-69273	Cyclin A/B1/B2 associated events during G2/M transition	7	25	0.0084	ENSP00000256442,ENSP00000261245,ENSP00000266970,ENSP00000324804,ENSP00000342307,ENSP00000378699,ENSP00000384863	CCNB1,CDK1,CDK2,FOXM1,MNAT1,PPP2R1A,XPO1
HSA-166016	Toll Like Receptor 4 (TLR4) Cascade	18	126	0.0085	ENSP00000216274,ENSP00000226574,ENSP00000259808,ENSP00000263025,ENSP00000263708,ENSP00000284981,ENSP00000306245,ENSP00000316176,ENSP00000324804,ENSP00000340874,ENSP00000359206,ENSP00000360266,ENSP00000363019,ENSP00000373905,ENSP00000378974,ENSP00000384273,ENSP00000387699,ENSP00000410402	APP,BTRC,CREB1,DNM2,FOS,JUN,MAP2K4,MAPK3,MAPK8,MEF2C,NFKB1,PPP2R1A,PTPN4,RELA,RIPK1,RIPK3,UBE2D1,UBE2N
HSA-180534	Vpu mediated degradation of CD4	10	49	0.0085	ENSP00000216802,ENSP00000293362,ENSP00000309474,ENSP00000310129,ENSP00000310572,ENSP00000348442,ENSP00000359206,ENSP00000391211,ENSP00000401802,ENSP00000481029	BTRC,PSMC2,PSMC3,PSMC5,PSMC6,PSMD1,PSMD12,PSMD2,PSME2,PSME3
HSA-68962	Activation of the pre-replicative complex	8	33	0.009	ENSP00000216122,ENSP00000234296,ENSP00000262105,ENSP00000264156,ENSP00000266970,ENSP00000322570,ENSP00000368349,ENSP00000418268	CDK2,MCM10,MCM4,MCM5,MCM6,ORC2,POLA1,POLE
HSA-169911	Regulation of Apoptosis	10	50	0.0095	ENSP00000216802,ENSP00000293362,ENSP00000309474,ENSP00000310129,ENSP00000310572,ENSP00000348442,ENSP00000354681,ENSP00000391211,ENSP00000401802,ENSP00000481029	OPA1,PSMC2,PSMC3,PSMC5,PSMC6,PSMD1,PSMD12,PSMD2,PSME2,PSME3
HSA-9604323	Negative regulation of NOTCH4 signaling	10	50	0.0095	ENSP00000216802,ENSP00000293362,ENSP00000309474,ENSP00000310129,ENSP00000310572,ENSP00000348442,ENSP00000391211,ENSP00000401802,ENSP00000451828,ENSP00000481029	AKT1,PSMC2,PSMC3,PSMC5,PSMC6,PSMD1,PSMD12,PSMD2,PSME2,PSME3
HSA-1168372	Downstream signaling events of B Cell Receptor (BCR)	13	78	0.0101	ENSP00000216802,ENSP00000226574,ENSP00000293362,ENSP00000309474,ENSP00000310129,ENSP00000310572,ENSP00000348442,ENSP00000359206,ENSP00000383003,ENSP00000384273,ENSP00000391211,ENSP00000401802,ENSP00000481029	BTRC,FKBP1A,NFKB1,PSMC2,PSMC3,PSMC5,PSMC6,PSMD1,PSMD12,PSMD2,PSME2,PSME3,RELA
HSA-5625900	RHO GTPases activate CIT	6	19	0.0102	ENSP00000216181,ENSP00000228872,ENSP00000353590,ENSP00000356319,ENSP00000378769,ENSP00000470298	CDKN1B,KIF14,MYH10,MYH14,MYH9,PPP1CB
HSA-77595	Processing of Intronless Pre-mRNAs	6	19	0.0102	ENSP00000216277,ENSP00000238112,ENSP00000245934,ENSP00000300291,ENSP00000364289,ENSP00000484669	CPSF1,CPSF3,NCBP1,NUDT21,PAPOLA,SYMPK
HSA-5368286	Mitochondrial translation initiation	14	88	0.0103	ENSP00000199706,ENSP00000254630,ENSP00000258383,ENSP00000258455,ENSP00000259873,ENSP00000305682,ENSP00000308275,ENSP00000315017,ENSP00000320184,ENSP00000354086,ENSP00000357320,ENSP00000418008,ENSP00000424328,ENSP00000449884	DAP3,MRPL1,MRPL28,MRPL37,MRPL38,MRPL39,MRPL42,MRPL44,MRPS18B,MRPS22,MRPS23,MRPS30,MRPS9,PTCD3
HSA-5419276	Mitochondrial translation termination	14	88	0.0103	ENSP00000199706,ENSP00000254630,ENSP00000258383,ENSP00000258455,ENSP00000259873,ENSP00000305682,ENSP00000308275,ENSP00000315017,ENSP00000320184,ENSP00000354086,ENSP00000357320,ENSP00000418008,ENSP00000424328,ENSP00000449884	DAP3,MRPL1,MRPL28,MRPL37,MRPL38,MRPL39,MRPL42,MRPL44,MRPS18B,MRPS22,MRPS23,MRPS30,MRPS9,PTCD3
HSA-8864260	Transcriptional regulation by the AP-2 (TFAP2) family of transcription factors	8	34	0.0103	ENSP00000263253,ENSP00000287394,ENSP00000296930,ENSP00000348056,ENSP00000371858,ENSP00000373620,ENSP00000405330,ENSP00000479618	ATAD2,EP300,ESR1,HSPD1,MYC,NOP2,NPM1,UBE2I
HSA-9020702	Interleukin-1 signaling	15	98	0.0103	ENSP00000216802,ENSP00000226574,ENSP00000284981,ENSP00000293362,ENSP00000309474,ENSP00000310129,ENSP00000310572,ENSP00000316176,ENSP00000348442,ENSP00000359206,ENSP00000384273,ENSP00000391211,ENSP00000401802,ENSP00000410402,ENSP00000481029	APP,BTRC,MAP2K4,NFKB1,PSMC2,PSMC3,PSMC5,PSMC6,PSMD1,PSMD12,PSMD2,PSME2,PSME3,RELA,UBE2N
HSA-380270	Recruitment of mitotic centrosome proteins and complexes	13	79	0.0109	ENSP00000248437,ENSP00000264071,ENSP00000264335,ENSP00000301071,ENSP00000324804,ENSP00000327077,ENSP00000335153,ENSP00000348965,ENSP00000352572,ENSP00000378699,ENSP00000393583,ENSP00000403453,ENSP00000432768	CDK1,CEP131,CKAP5,DYNC1H1,HSP90AA1,ODF2,PCM1,PCNT,PPP2R1A,TUBA1A,TUBA4A,TUBB4A,YWHAE
HSA-211227	Activation of DNA fragmentation factor	5	13	0.0112	ENSP00000244534,ENSP00000244573,ENSP00000290158,ENSP00000307705,ENSP00000330074	HIST1H1A,HIST1H1B,HIST1H1D,HIST1H1E,KPNB1
HSA-69231	Cyclin D associated events in G1	9	43	0.0114	ENSP00000228872,ENSP00000261245,ENSP00000262133,ENSP00000265734,ENSP00000267163,ENSP00000274255,ENSP00000324804,ENSP00000345571,ENSP00000362768	CDK6,CDKN1B,E2F1,MNAT1,PPP2R1A,RB1,RBL1,RBL2,SKP2
HSA-4608870	Asymmetric localization of PCP proteins	11	61	0.0117	ENSP00000005340,ENSP00000216802,ENSP00000219255,ENSP00000293362,ENSP00000309474,ENSP00000310129,ENSP00000310572,ENSP00000348442,ENSP00000391211,ENSP00000401802,ENSP00000481029	DVL2,PARD6A,PSMC2,PSMC3,PSMC5,PSMC6,PSMD1,PSMD12,PSMD2,PSME2,PSME3
HSA-5358346	Hedgehog ligand biogenesis	11	61	0.0117	ENSP00000216802,ENSP00000293362,ENSP00000309474,ENSP00000310129,ENSP00000310572,ENSP00000327801,ENSP00000348442,ENSP00000351777,ENSP00000391211,ENSP00000401802,ENSP00000481029	P4HB,PSMC2,PSMC3,PSMC5,PSMC6,PSMD1,PSMD12,PSMD2,PSME2,PSME3,VCP
HSA-8854050	FBXL7 down-regulates AURKA during mitotic entry and in early mitosis	10	52	0.0117	ENSP00000216802,ENSP00000216911,ENSP00000293362,ENSP00000309474,ENSP00000310129,ENSP00000310572,ENSP00000348442,ENSP00000391211,ENSP00000401802,ENSP00000481029	AURKA,PSMC2,PSMC3,PSMC5,PSMC6,PSMD1,PSMD12,PSMD2,PSME2,PSME3
HSA-611105	Respiratory electron transport	15	100	0.0119	ENSP00000203407,ENSP00000233627,ENSP00000246957,ENSP00000252711,ENSP00000260665,ENSP00000264932,ENSP00000266544,ENSP00000268379,ENSP00000309565,ENSP00000312618,ENSP00000322450,ENSP00000356972,ENSP00000364649,ENSP00000392709,ENSP00000452762	ACAD9,ETFA,LRPPRC,NDUFA10,NDUFA9,NDUFS1,NDUFS2,NDUFS7,NDUFV1,SDHA,SDHB,TRAP1,UQCRC1,UQCRC2,UQCRH
HSA-1834949	Cytosolic sensors of pathogen-associated DNA	11	62	0.0129	ENSP00000216274,ENSP00000226574,ENSP00000259808,ENSP00000263253,ENSP00000313420,ENSP00000325863,ENSP00000344456,ENSP00000352257,ENSP00000375978,ENSP00000384273,ENSP00000417078	CTNNB1,DHX36,EP300,MRE11A,NFKB1,PRKDC,RELA,RIPK1,RIPK3,XRCC5,XRCC6
HSA-1655829	Regulation of cholesterol biosynthesis by SREBP (SREBF)	10	53	0.0131	ENSP00000265276,ENSP00000290158,ENSP00000304592,ENSP00000306881,ENSP00000329357,ENSP00000343405,ENSP00000385523,ENSP00000405574,ENSP00000417401,ENSP00000483300	ACACA,FASN,GPAM,HELZ2,KPNB1,PPARA,SEC23A,SEC24C,SP1,TBL1XR1
HSA-5362768	Hh mutants that don't undergo autocatalytic processing are degraded by ERAD	10	53	0.0131	ENSP00000216802,ENSP00000293362,ENSP00000309474,ENSP00000310129,ENSP00000310572,ENSP00000348442,ENSP00000351777,ENSP00000391211,ENSP00000401802,ENSP00000481029	PSMC2,PSMC3,PSMC5,PSMC6,PSMD1,PSMD12,PSMD2,PSME2,PSME3,VCP
HSA-8866654	E3 ubiquitin ligases ubiquitinate target proteins	10	53	0.0131	ENSP00000313420,ENSP00000316176,ENSP00000325677,ENSP00000346986,ENSP00000349016,ENSP00000351777,ENSP00000363019,ENSP00000366618,ENSP00000373772,ENSP00000476136	HIST1H2BJ,HIST1H2BL,PEX14,PRKDC,RNF20,RNF40,UBE2D1,UBE2N,VCP,WAC
HSA-539107	Activation of E2F1 target genes at G1/S	7	28	0.0134	ENSP00000262133,ENSP00000345571,ENSP00000362592,ENSP00000362649,ENSP00000362768,ENSP00000368349,ENSP00000378699	CDK1,E2F1,HDAC1,POLA1,RBBP4,RBL1,RBL2
HSA-5685938	HDR through Single Strand Annealing (SSA)	8	36	0.0134	ENSP00000265433,ENSP00000278616,ENSP00000298139,ENSP00000311360,ENSP00000325863,ENSP00000340330,ENSP00000347232,ENSP00000368100	ATM,BLM,KAT5,MRE11A,NBN,RAD50,RAD9A,WRN
HSA-73933	Resolution of Abasic Sites (AP sites)	8	36	0.0134	ENSP00000216714,ENSP00000250416,ENSP00000263681,ENSP00000322570,ENSP00000355759,ENSP00000371321,ENSP00000376611,ENSP00000480186	APEX1,PARP1,PARP2,POLD2,POLD3,POLE,RFC1,TDG
HSA-139915	Activation of PUMA and translocation to mitochondria	4	8	0.0135	ENSP00000264731,ENSP00000269305,ENSP00000345571,ENSP00000367545	E2F1,TP53,TP63,TP73
HSA-450520	HuR (ELAVL1) binds and stabilizes mRNA	4	8	0.0135	ENSP00000352400,ENSP00000361777,ENSP00000384863,ENSP00000385269	ELAVL1,NUP214,SET,XPO1
HSA-450294	MAP kinase activation	11	63	0.014	ENSP00000226574,ENSP00000263025,ENSP00000306245,ENSP00000316176,ENSP00000324804,ENSP00000340874,ENSP00000359206,ENSP00000360266,ENSP00000378974,ENSP00000387699,ENSP00000410402	BTRC,CREB1,FOS,JUN,MAP2K4,MAPK3,MAPK8,MEF2C,NFKB1,PPP2R1A,UBE2N
HSA-446652	Interleukin-1 family signaling	18	134	0.0141	ENSP00000216802,ENSP00000226574,ENSP00000263708,ENSP00000264657,ENSP00000284981,ENSP00000293362,ENSP00000309474,ENSP00000310129,ENSP00000310572,ENSP00000316176,ENSP00000348442,ENSP00000359206,ENSP00000378974,ENSP00000384273,ENSP00000391211,ENSP00000401802,ENSP00000410402,ENSP00000481029	APP,BTRC,MAP2K4,MAPK8,NFKB1,PSMC2,PSMC3,PSMC5,PSMC6,PSMD1,PSMD12,PSMD2,PSME2,PSME3,PTPN4,RELA,STAT3,UBE2N
HSA-381340	Transcriptional regulation of white adipocyte differentiation	13	83	0.015	ENSP00000226574,ENSP00000263253,ENSP00000264867,ENSP00000268712,ENSP00000287820,ENSP00000302967,ENSP00000319814,ENSP00000363193,ENSP00000384273,ENSP00000385523,ENSP00000386433,ENSP00000405574,ENSP00000417401	EP300,HDAC3,HELZ2,MED12,NCOR1,NFKB1,PCK1,PPARA,PPARG,PPARGC1A,RELA,TBL1XR1,ZNF638
HSA-427359	SIRT1 negatively regulates rRNA expression	8	37	0.0151	ENSP00000212015,ENSP00000254605,ENSP00000332194,ENSP00000337976,ENSP00000358151,ENSP00000366618,ENSP00000434024,ENSP00000476136	H2AFX,HIST1H2BJ,HIST1H2BL,HIST2H2AC,HIST2H2BE,RRP8,SIRT1,SUV39H1
HSA-77289	Mitochondrial Fatty Acid Beta-Oxidation	8	37	0.0151	ENSP00000281317,ENSP00000357535,ENSP00000357804,ENSP00000365462,ENSP00000368605,ENSP00000370023,ENSP00000401831,ENSP00000438689	ACADVL,ACOT9,ACSF2,ECHS1,HADHA,MMAA,PCCA,THEM4
HSA-114452	Activation of BH3-only proteins	7	29	0.0153	ENSP00000264335,ENSP00000264731,ENSP00000269305,ENSP00000345571,ENSP00000367545,ENSP00000378974,ENSP00000451828	AKT1,E2F1,MAPK8,TP53,TP63,TP73,YWHAE
HSA-975871	MyD88 cascade initiated on plasma membrane	13	84	0.0162	ENSP00000226574,ENSP00000263025,ENSP00000284981,ENSP00000306245,ENSP00000316176,ENSP00000324804,ENSP00000340874,ENSP00000359206,ENSP00000360266,ENSP00000378974,ENSP00000384273,ENSP00000387699,ENSP00000410402	APP,BTRC,CREB1,FOS,JUN,MAP2K4,MAPK3,MAPK8,MEF2C,NFKB1,PPP2R1A,RELA,UBE2N
HSA-5658442	Regulation of RAS by GAPs	11	65	0.0169	ENSP00000216802,ENSP00000293362,ENSP00000309474,ENSP00000310129,ENSP00000310572,ENSP00000348442,ENSP00000351015,ENSP00000368797,ENSP00000391211,ENSP00000401802,ENSP00000481029	KBTBD7,NF1,PSMC2,PSMC3,PSMC5,PSMC6,PSMD1,PSMD12,PSMD2,PSME2,PSME3
HSA-2173795	Downregulation of SMAD2/3:SMAD4 transcriptional activity	6	22	0.017	ENSP00000268712,ENSP00000316357,ENSP00000355759,ENSP00000362649,ENSP00000363019,ENSP00000367797	HDAC1,NCOR1,PARP1,SKI,UBE2D1,USP9X
HSA-3296482	Defects in vitamin and cofactor metabolism	6	22	0.017	ENSP00000265594,ENSP00000281317,ENSP00000343657,ENSP00000365462,ENSP00000377532,ENSP00000483300	ACACA,MCCC1,MCCC2,MMAA,PC,PCCA
HSA-5693616	Presynaptic phase of homologous DNA pairing and strand exchange	8	38	0.017	ENSP00000265433,ENSP00000278616,ENSP00000298139,ENSP00000311360,ENSP00000325863,ENSP00000340330,ENSP00000347232,ENSP00000368100	ATM,BLM,KAT5,MRE11A,NBN,RAD50,RAD9A,WRN
HSA-5676590	NIK-->noncanonical NF-kB signaling	10	56	0.0174	ENSP00000216802,ENSP00000293362,ENSP00000309474,ENSP00000310129,ENSP00000310572,ENSP00000348442,ENSP00000359206,ENSP00000391211,ENSP00000401802,ENSP00000481029	BTRC,PSMC2,PSMC3,PSMC5,PSMC6,PSMD1,PSMD12,PSMD2,PSME2,PSME3
HSA-68827	CDT1 association with the CDC6:ORC:origin complex	10	56	0.0174	ENSP00000216802,ENSP00000234296,ENSP00000293362,ENSP00000309474,ENSP00000310129,ENSP00000310572,ENSP00000348442,ENSP00000391211,ENSP00000401802,ENSP00000481029	ORC2,PSMC2,PSMC3,PSMC5,PSMC6,PSMD1,PSMD12,PSMD2,PSME2,PSME3
HSA-1236978	Cross-presentation of soluble exogenous antigens (endosomes)	9	47	0.0175	ENSP00000216802,ENSP00000293362,ENSP00000309474,ENSP00000310129,ENSP00000310572,ENSP00000348442,ENSP00000391211,ENSP00000401802,ENSP00000481029	PSMC2,PSMC3,PSMC5,PSMC6,PSMD1,PSMD12,PSMD2,PSME2,PSME3
HSA-180786	Extension of Telomeres	7	30	0.0175	ENSP00000263681,ENSP00000318297,ENSP00000322570,ENSP00000368349,ENSP00000371321,ENSP00000473172,ENSP00000480186	POLA1,POLD2,POLD3,POLE,RFC1,RUVBL1,RUVBL2
HSA-211733	Regulation of activated PAK-2p34 by proteasome mediated degradation	9	47	0.0175	ENSP00000216802,ENSP00000293362,ENSP00000309474,ENSP00000310129,ENSP00000310572,ENSP00000348442,ENSP00000391211,ENSP00000401802,ENSP00000481029	PSMC2,PSMC3,PSMC5,PSMC6,PSMD1,PSMD12,PSMD2,PSME2,PSME3
HSA-74749	Signal attenuation	4	9	0.0178	ENSP00000263025,ENSP00000304895,ENSP00000365016,ENSP00000401303	IRS1,IRS2,MAPK3,SHC1
HSA-8983711	OAS antiviral response	4	9	0.0178	ENSP00000257570,ENSP00000296577,ENSP00000309142,ENSP00000358866	ABCE1,FLNA,OASL,PDE12
HSA-9022707	MECP2 regulates transcription factors	3	4	0.0187	ENSP00000287820,ENSP00000340874,ENSP00000387699	CREB1,MEF2C,PPARG
HSA-110313	Translesion synthesis by Y family DNA polymerases bypasses lesions on DNA template	8	39	0.019	ENSP00000263681,ENSP00000322570,ENSP00000323889,ENSP00000351777,ENSP00000361310,ENSP00000371321,ENSP00000457411,ENSP00000480186	POLD2,POLD3,POLE,POLH,RFC1,TRIM25,USP10,VCP
HSA-5610783	Degradation of GLI2 by the proteasome	10	57	0.019	ENSP00000216802,ENSP00000293362,ENSP00000309474,ENSP00000310129,ENSP00000310572,ENSP00000348442,ENSP00000359206,ENSP00000391211,ENSP00000401802,ENSP00000481029	BTRC,PSMC2,PSMC3,PSMC5,PSMC6,PSMD1,PSMD12,PSMD2,PSME2,PSME3
HSA-5610785	GLI3 is processed to GLI3R by the proteasome	10	57	0.019	ENSP00000216802,ENSP00000293362,ENSP00000309474,ENSP00000310129,ENSP00000310572,ENSP00000348442,ENSP00000359206,ENSP00000391211,ENSP00000401802,ENSP00000481029	BTRC,PSMC2,PSMC3,PSMC5,PSMC6,PSMD1,PSMD12,PSMD2,PSME2,PSME3
HSA-71387	Metabolism of carbohydrates	29	266	0.019	ENSP00000216392,ENSP00000216780,ENSP00000216962,ENSP00000229179,ENSP00000229239,ENSP00000231498,ENSP00000254508,ENSP00000261396,ENSP00000264717,ENSP00000283195,ENSP00000285968,ENSP00000310668,ENSP00000317904,ENSP00000319814,ENSP00000324804,ENSP00000352400,ENSP00000356448,ENSP00000359991,ENSP00000361658,ENSP00000362413,ENSP00000367721,ENSP00000370517,ENSP00000370555,ENSP00000377192,ENSP00000377532…	G6PD,GAPDH,GCKR,GYG2,GYS1,HK1,NUP107,NUP133,NUP153,NUP155,NUP160,NUP188,NUP205,NUP210,NUP214,NUP88,NUP93,PC,PCK1,PCK2,PFKP,PGAM1,PGK1,PPP2R1A,PYGB,PYGL,RANBP2,SLC25A13,TPR
HSA-983705	Signaling by the B Cell Receptor (BCR)	15	107	0.019	ENSP00000216802,ENSP00000226574,ENSP00000293362,ENSP00000309474,ENSP00000310129,ENSP00000310572,ENSP00000348442,ENSP00000359206,ENSP00000363435,ENSP00000383003,ENSP00000384273,ENSP00000391211,ENSP00000401802,ENSP00000428056,ENSP00000481029	BTRC,FKBP1A,ITPR3,NFKB1,PIK3R1,PSMC2,PSMC3,PSMC5,PSMC6,PSMD1,PSMD12,PSMD2,PSME2,PSME3,RELA
HSA-350562	Regulation of ornithine decarboxylase (ODC)	9	48	0.0192	ENSP00000216802,ENSP00000293362,ENSP00000309474,ENSP00000310129,ENSP00000310572,ENSP00000348442,ENSP00000391211,ENSP00000401802,ENSP00000481029	PSMC2,PSMC3,PSMC5,PSMC6,PSMD1,PSMD12,PSMD2,PSME2,PSME3
HSA-373753	Nephrin family interactions	6	23	0.0195	ENSP00000252699,ENSP00000268182,ENSP00000349259,ENSP00000361824,ENSP00000377941,ENSP00000428056	ACTN1,ACTN4,IQGAP1,PIK3R1,SPTAN1,SPTBN1
HSA-110314	Recognition of DNA damage by PCNA-containing replication complex	7	31	0.0198	ENSP00000263681,ENSP00000301764,ENSP00000322570,ENSP00000364589,ENSP00000371321,ENSP00000384109,ENSP00000480186	CUL4A,CUL4B,DDB1,POLD2,POLD3,POLE,RFC1
HSA-450282	MAPK targets/ Nuclear events mediated by MAP kinases	7	31	0.0198	ENSP00000263025,ENSP00000306245,ENSP00000324804,ENSP00000340874,ENSP00000360266,ENSP00000378974,ENSP00000387699	CREB1,FOS,JUN,MAPK3,MAPK8,MEF2C,PPP2R1A
HSA-5693568	Resolution of D-loop Structures through Holliday Junction Intermediates	7	31	0.0198	ENSP00000265433,ENSP00000278616,ENSP00000298139,ENSP00000325863,ENSP00000340330,ENSP00000347232,ENSP00000368100	ATM,BLM,KAT5,MRE11A,NBN,RAD50,WRN
HSA-69190	DNA strand elongation	7	31	0.0198	ENSP00000216122,ENSP00000262105,ENSP00000263681,ENSP00000264156,ENSP00000368349,ENSP00000371321,ENSP00000480186	MCM4,MCM5,MCM6,POLA1,POLD2,POLD3,RFC1
HSA-156711	Polo-like kinase mediated events	5	16	0.0203	ENSP00000256442,ENSP00000263253,ENSP00000342307,ENSP00000355922,ENSP00000362592	CCNB1,CENPF,EP300,FOXM1,RBBP4
HSA-210744	Regulation of gene expression in late stage (branching morphogenesis) pancreatic bud precursor cells	5	16	0.0203	ENSP00000225916,ENSP00000232424,ENSP00000261531,ENSP00000263253,ENSP00000263754	EP300,HES1,KAT2A,KAT2B,SNW1
HSA-5678895	Defective CFTR causes cystic fibrosis	10	58	0.0205	ENSP00000216802,ENSP00000293362,ENSP00000309474,ENSP00000310129,ENSP00000310572,ENSP00000348442,ENSP00000351777,ENSP00000391211,ENSP00000401802,ENSP00000481029	PSMC2,PSMC3,PSMC5,PSMC6,PSMD1,PSMD12,PSMD2,PSME2,PSME3,VCP
HSA-69229	Ubiquitin-dependent degradation of Cyclin D1	9	49	0.0211	ENSP00000216802,ENSP00000293362,ENSP00000309474,ENSP00000310129,ENSP00000310572,ENSP00000348442,ENSP00000391211,ENSP00000401802,ENSP00000481029	PSMC2,PSMC3,PSMC5,PSMC6,PSMD1,PSMD12,PSMD2,PSME2,PSME3
HSA-2173796	SMAD2/SMAD3:SMAD4 heterotrimer regulates transcription	7	32	0.0224	ENSP00000261531,ENSP00000262158,ENSP00000329357,ENSP00000362361,ENSP00000362649,ENSP00000362768,ENSP00000479618	CDK9,HDAC1,MYC,RBL1,SMAD7,SNW1,SP1
HSA-379716	Cytosolic tRNA aminoacylation	6	24	0.0224	ENSP00000234677,ENSP00000256854,ENSP00000261772,ENSP00000325448,ENSP00000347495,ENSP00000373918	AARS,GARS,KARS,NARS,SARS,WARS
HSA-5656169	Termination of translesion DNA synthesis	7	32	0.0224	ENSP00000263681,ENSP00000322570,ENSP00000323889,ENSP00000361310,ENSP00000371321,ENSP00000457411,ENSP00000480186	POLD2,POLD3,POLE,POLH,RFC1,TRIM25,USP10
HSA-73728	RNA Polymerase I Promoter Opening	7	32	0.0224	ENSP00000263025,ENSP00000302640,ENSP00000332194,ENSP00000358151,ENSP00000366618,ENSP00000434024,ENSP00000476136	H2AFX,HIST1H2BJ,HIST1H2BL,HIST2H2AC,HIST2H2BE,MAPK3,UBTF
HSA-450341	Activation of the AP-1 family of transcription factors	4	10	0.0225	ENSP00000263025,ENSP00000306245,ENSP00000360266,ENSP00000378974	FOS,JUN,MAPK3,MAPK8
HSA-4755510	SUMOylation of immune response proteins	4	10	0.0225	ENSP00000262971,ENSP00000348056,ENSP00000376765,ENSP00000384273	PIAS3,PIAS4,RELA,UBE2I
HSA-180585	Vif-mediated degradation of APOBEC3G	9	50	0.0232	ENSP00000216802,ENSP00000293362,ENSP00000309474,ENSP00000310129,ENSP00000310572,ENSP00000348442,ENSP00000391211,ENSP00000401802,ENSP00000481029	PSMC2,PSMC3,PSMC5,PSMC6,PSMD1,PSMD12,PSMD2,PSME2,PSME3
HSA-5620924	Intraflagellar transport	9	50	0.0232	ENSP00000217133,ENSP00000248437,ENSP00000264071,ENSP00000301071,ENSP00000301072,ENSP00000320295,ENSP00000336712,ENSP00000369703,ENSP00000384290	ENSG00000258947,TNPO1,TUBA1A,TUBA1C,TUBA4A,TUBB1,TUBB2A,TUBB4A,WDR60
HSA-8876725	Protein methylation	5	17	0.0242	ENSP00000307940,ENSP00000339063,ENSP00000341885,ENSP00000351777,ENSP00000432083	EEF1A1,EEF2,HSPA8,RPS2,VCP
HSA-70263	Gluconeogenesis	7	33	0.0252	ENSP00000216780,ENSP00000229239,ENSP00000319814,ENSP00000359991,ENSP00000362413,ENSP00000377532,ENSP00000400101	GAPDH,PC,PCK1,PCK2,PGAM1,PGK1,SLC25A13
HSA-8848021	Signaling by PTK6	9	51	0.0256	ENSP00000228872,ENSP00000263734,ENSP00000264033,ENSP00000264657,ENSP00000266970,ENSP00000301396,ENSP00000349748,ENSP00000437955,ENSP00000451828	AKT1,CBL,CDK2,CDKN1B,EPAS1,HIF1A,PELP1,SFPQ,STAT3
HSA-1266695	Interleukin-7 signaling	6	25	0.0259	ENSP00000264657,ENSP00000304895,ENSP00000343204,ENSP00000365016,ENSP00000395654,ENSP00000428056	IRS1,IRS2,JAK1,PIK3R1,SMARCA4,STAT3
HSA-2173788	Downregulation of TGF-beta receptor signaling	6	25	0.0259	ENSP00000219548,ENSP00000262158,ENSP00000326031,ENSP00000341779,ENSP00000378769,ENSP00000384863	PPP1CA,PPP1CB,PPP1CC,SMAD7,STUB1,XPO1
HSA-6814122	Cooperation of PDCL (PhLP1) and TRiC/CCT in G-protein beta folding	8	42	0.0259	ENSP00000217244,ENSP00000262506,ENSP00000280326,ENSP00000286788,ENSP00000295688,ENSP00000299300,ENSP00000317334,ENSP00000365042	CCT2,CCT3,CCT5,CCT8,CSNK2A1,CSNK2A2,CSNK2B,TCP1
HSA-975138	TRAF6 mediated induction of NFkB and MAP kinases upon TLR7/8 or 9 activation	13	91	0.0259	ENSP00000226574,ENSP00000263025,ENSP00000284981,ENSP00000306245,ENSP00000316176,ENSP00000324804,ENSP00000340874,ENSP00000359206,ENSP00000360266,ENSP00000378974,ENSP00000384273,ENSP00000387699,ENSP00000410402	APP,BTRC,CREB1,FOS,JUN,MAP2K4,MAPK3,MAPK8,MEF2C,NFKB1,PPP2R1A,RELA,UBE2N
HSA-983170	Antigen Presentation: Folding, assembly and peptide loading of class I MHC	6	25	0.0259	ENSP00000247461,ENSP00000306881,ENSP00000320866,ENSP00000324173,ENSP00000343405,ENSP00000373312	CALR,CANX,HSPA5,SEC13,SEC23A,SEC24C
HSA-351202	Metabolism of polyamines	12	81	0.0264	ENSP00000216802,ENSP00000293362,ENSP00000299198,ENSP00000309474,ENSP00000310129,ENSP00000310572,ENSP00000348442,ENSP00000361471,ENSP00000391211,ENSP00000401802,ENSP00000402608,ENSP00000481029	ASS1,CKB,CPS1,PSMC2,PSMC3,PSMC5,PSMC6,PSMD1,PSMD12,PSMD2,PSME2,PSME3
HSA-5368598	Negative regulation of TCF-dependent signaling by DVL-interacting proteins	3	5	0.0264	ENSP00000005340,ENSP00000316054,ENSP00000368169	DVL1,DVL2,DVL3
HSA-8849473	PTK6 Expression	3	5	0.0264	ENSP00000263734,ENSP00000301396,ENSP00000437955	EPAS1,HIF1A,PELP1
HSA-8869496	TFAP2A acts as a transcriptional repressor during retinoic acid induced cell differentiation	3	5	0.0264	ENSP00000296930,ENSP00000371858,ENSP00000373620	HSPD1,NOP2,NPM1
HSA-4641257	Degradation of AXIN	9	52	0.0277	ENSP00000216802,ENSP00000293362,ENSP00000309474,ENSP00000310129,ENSP00000310572,ENSP00000348442,ENSP00000391211,ENSP00000401802,ENSP00000481029	PSMC2,PSMC3,PSMC5,PSMC6,PSMD1,PSMD12,PSMD2,PSME2,PSME3
HSA-351906	Apoptotic cleavage of cell adhesion proteins	4	11	0.0279	ENSP00000281537,ENSP00000344456,ENSP00000369129,ENSP00000438262	CTNNB1,DSP,TJP1,TJP2
HSA-5334118	DNA methylation	7	34	0.0279	ENSP00000328547,ENSP00000332194,ENSP00000352516,ENSP00000358151,ENSP00000366618,ENSP00000434024,ENSP00000476136	DNMT1,DNMT3B,H2AFX,HIST1H2BJ,HIST1H2BL,HIST2H2AC,HIST2H2BE
HSA-9005891	Loss of function of MECP2 in Rett syndrome	4	11	0.0279	ENSP00000268712,ENSP00000302967,ENSP00000362649,ENSP00000405574	HDAC1,HDAC3,NCOR1,TBL1XR1
HSA-109606	Intrinsic Pathway for Apoptosis	8	43	0.0282	ENSP00000264335,ENSP00000264657,ENSP00000264731,ENSP00000269305,ENSP00000345571,ENSP00000367545,ENSP00000378974,ENSP00000451828	AKT1,E2F1,MAPK8,STAT3,TP53,TP63,TP73,YWHAE
HSA-1368082	RORA activates gene expression	5	18	0.0282	ENSP00000263253,ENSP00000348069,ENSP00000385523,ENSP00000405574,ENSP00000417401	EP300,HELZ2,PPARA,SREBF1,TBL1XR1
HSA-5632684	Hedgehog 'on' state	12	82	0.0282	ENSP00000216802,ENSP00000228682,ENSP00000293362,ENSP00000309474,ENSP00000310129,ENSP00000310572,ENSP00000348442,ENSP00000377001,ENSP00000391211,ENSP00000401802,ENSP00000403701,ENSP00000481029	ARRB2,GLI1,PSMC2,PSMC3,PSMC5,PSMC6,PSMD1,PSMD12,PSMD2,PSME2,PSME3,SPOP
HSA-421837	Clathrin derived vesicle budding	11	72	0.0284	ENSP00000256637,ENSP00000262640,ENSP00000284981,ENSP00000349437,ENSP00000350199,ENSP00000373905,ENSP00000376024,ENSP00000377015,ENSP00000391723,ENSP00000432083,ENSP00000479606	AP1B1,APP,CLTC,DNM2,HSPA8,IGF2R,PICALM,PUM1,SNX9,SORT1,VAMP7
HSA-8856828	Clathrin-mediated endocytosis	17	137	0.0299	ENSP00000005340,ENSP00000250495,ENSP00000262640,ENSP00000263238,ENSP00000264033,ENSP00000264389,ENSP00000349437,ENSP00000350512,ENSP00000367220,ENSP00000373905,ENSP00000376024,ENSP00000377015,ENSP00000377664,ENSP00000403701,ENSP00000432083,ENSP00000479606,ENSP00000482835	ACTR2,ACTR3,AP2B1,ARRB2,CBL,CLTC,COPS4,COPS5,DNM2,DVL2,GAPVD1,HSPA8,IGF2R,NEDD8,PICALM,SNX9,VAMP7
HSA-5628897	TP53 Regulates Metabolic Genes	12	83	0.0302	ENSP00000219476,ENSP00000260665,ENSP00000264335,ENSP00000264731,ENSP00000269305,ENSP00000307272,ENSP00000317379,ENSP00000354558,ENSP00000362300,ENSP00000377192,ENSP00000399797,ENSP00000451828	AGO1,AKT1,G6PD,GLS,LRPPRC,MOV10,MTOR,RPTOR,TP53,TP63,TSC2,YWHAE
HSA-6802948	Signaling by high-kinase activity BRAF mutants	7	35	0.0312	ENSP00000211998,ENSP00000263025,ENSP00000268182,ENSP00000316029,ENSP00000358723,ENSP00000389715,ENSP00000403701	ARRB2,IQGAP1,KSR2,MAPK3,RAP1A,TLN1,VCL
HSA-166058	MyD88:MAL(TIRAP) cascade initiated on plasma membrane	13	94	0.0313	ENSP00000226574,ENSP00000263025,ENSP00000284981,ENSP00000306245,ENSP00000316176,ENSP00000324804,ENSP00000340874,ENSP00000359206,ENSP00000360266,ENSP00000378974,ENSP00000384273,ENSP00000387699,ENSP00000410402	APP,BTRC,CREB1,FOS,JUN,MAP2K4,MAPK3,MAPK8,MEF2C,NFKB1,PPP2R1A,RELA,UBE2N
HSA-674695	RNA Polymerase II Pre-transcription Events	12	84	0.0324	ENSP00000252674,ENSP00000261245,ENSP00000262809,ENSP00000319104,ENSP00000362361,ENSP00000364289,ENSP00000367406,ENSP00000369695,ENSP00000452454,ENSP00000470252,ENSP00000474096,ENSP00000480158	CDK9,ELL,GTF2A1,MLLT1,MLLT3,MNAT1,NCBP1,POLR2A,SUPT5H,SUPT6H,TAF15,TAF2
HSA-432722	Golgi Associated Vesicle Biogenesis	9	54	0.0329	ENSP00000256637,ENSP00000262640,ENSP00000349437,ENSP00000350199,ENSP00000373905,ENSP00000376024,ENSP00000377015,ENSP00000391723,ENSP00000432083	AP1B1,DNM2,HSPA8,IGF2R,PICALM,PUM1,SNX9,SORT1,VAMP7
HSA-2028269	Signaling by Hippo	5	19	0.0331	ENSP00000005340,ENSP00000264335,ENSP00000281537,ENSP00000361892,ENSP00000438262	DVL2,STK4,TJP1,TJP2,YWHAE
HSA-1368108	BMAL1:CLOCK,NPAS2 activates circadian gene expression	6	27	0.0332	ENSP00000242728,ENSP00000308741,ENSP00000384517,ENSP00000385523,ENSP00000405574,ENSP00000417401	ARNTL,BHLHE41,CLOCK,HELZ2,PPARA,TBL1XR1
HSA-2197563	NOTCH2 intracellular domain regulates transcription	4	12	0.0343	ENSP00000232424,ENSP00000263253,ENSP00000367714,ENSP00000387699	CREB1,EP300,HES1,HES5
HSA-264870	Caspase-mediated cleavage of cytoskeletal proteins	4	12	0.0343	ENSP00000323856,ENSP00000340820,ENSP00000361824,ENSP00000446007	MAPT,PLEC,SPTAN1,VIM
HSA-6803207	TP53 Regulates Transcription of Caspase Activators and Caspases	4	12	0.0343	ENSP00000264731,ENSP00000269305,ENSP00000278616,ENSP00000367545	ATM,TP53,TP63,TP73
HSA-71064	Lysine catabolism	4	12	0.0343	ENSP00000205402,ENSP00000222214,ENSP00000222673,ENSP00000335304	DLD,DLST,GCDH,OGDH
HSA-8866427	VLDLR internalisation and degradation	4	12	0.0343	ENSP00000253727,ENSP00000477707,ENSP00000479606,ENSP00000482835	AP2B1,CLTC,NR1H2,NR1H3
HSA-5625886	Activated PKN1 stimulates transcription of AR (androgen receptor) regulated genes KLK2 and KLK3	7	36	0.0345	ENSP00000332194,ENSP00000358151,ENSP00000363822,ENSP00000366618,ENSP00000383042,ENSP00000434024,ENSP00000476136	AR,H2AFX,HIST1H2BJ,HIST1H2BL,HIST2H2AC,HIST2H2BE,KDM1A
HSA-193704	p75 NTR receptor-mediated signalling	13	96	0.0353	ENSP00000226574,ENSP00000264335,ENSP00000269321,ENSP00000302967,ENSP00000337838,ENSP00000348828,ENSP00000362649,ENSP00000364847,ENSP00000376457,ENSP00000378974,ENSP00000384273,ENSP00000430432,ENSP00000477848	AATF,ARHGDIA,ARHGEF26,ECT2,HDAC1,HDAC2,HDAC3,MAGED1,MAPK8,NFKB1,RELA,RTN4,YWHAE
HSA-193670	p75NTR negatively regulates cell cycle via SC1	3	6	0.0354	ENSP00000302967,ENSP00000362649,ENSP00000430432	HDAC1,HDAC2,HDAC3
HSA-3000484	Scavenging by Class F Receptors	3	6	0.0354	ENSP00000320866,ENSP00000335153,ENSP00000480150	CALR,HSP90AA1,HYOU1
HSA-6799990	Metal sequestration by antimicrobial proteins	3	6	0.0354	ENSP00000231751,ENSP00000357722,ENSP00000357727	LTF,S100A8,S100A9
HSA-9022537	Loss of MECP2 binding ability to the NCoR/SMRT complex	3	6	0.0354	ENSP00000268712,ENSP00000302967,ENSP00000405574	HDAC3,NCOR1,TBL1XR1
HSA-5627123	RHO GTPases activate PAKs	5	20	0.0381	ENSP00000216181,ENSP00000353590,ENSP00000358866,ENSP00000378769,ENSP00000470298	FLNA,MYH10,MYH14,MYH9,PPP1CB
HSA-176187	Activation of ATR in response to replication stress	7	37	0.0382	ENSP00000216122,ENSP00000234296,ENSP00000262105,ENSP00000264156,ENSP00000266970,ENSP00000311360,ENSP00000418268	CDK2,MCM10,MCM4,MCM5,MCM6,ORC2,RAD9A
HSA-381070	IRE1alpha activates chaperones	9	56	0.0385	ENSP00000316029,ENSP00000324173,ENSP00000349860,ENSP00000357283,ENSP00000364591,ENSP00000401303,ENSP00000438689,ENSP00000438788,ENSP00000480150	ACADVL,CUL7,GFPT1,HSPA5,HYOU1,LMNA,SHC1,TLN1,TSPYL2
HSA-196849	Metabolism of water-soluble vitamins and cofactors	15	120	0.0397	ENSP00000230792,ENSP00000258494,ENSP00000265594,ENSP00000273450,ENSP00000281317,ENSP00000292180,ENSP00000304592,ENSP00000333667,ENSP00000343657,ENSP00000365462,ENSP00000366410,ENSP00000371362,ENSP00000377532,ENSP00000478253,ENSP00000483300	ACACA,ALDH1L1,ALDH1L2,FASN,FLAD1,MCCC1,MCCC2,MMAA,MTHFD1L,NADK2,NMNAT1,NUDT12,PC,PCCA,SHMT2
HSA-113501	Inhibition of replication initiation of damaged DNA by RB1/E2F1	4	13	0.0413	ENSP00000267163,ENSP00000324804,ENSP00000345571,ENSP00000368349	E2F1,POLA1,PPP2R1A,RB1
HSA-3270619	IRF3-mediated induction of type I IFN	4	13	0.0413	ENSP00000313420,ENSP00000325863,ENSP00000352257,ENSP00000375978	MRE11A,PRKDC,XRCC5,XRCC6
HSA-6803205	TP53 regulates transcription of several additional cell death genes whose specific roles in p53-dependent apoptosis remain uncertain	4	13	0.0413	ENSP00000264731,ENSP00000269305,ENSP00000367545,ENSP00000384371	BCL6,TP53,TP63,TP73
HSA-75035	Chk1/Chk2(Cds1) mediated inactivation of Cyclin B:Cdk1 complex	4	13	0.0413	ENSP00000256442,ENSP00000264335,ENSP00000372023,ENSP00000378699	CCNB1,CDK1,CHEK2,YWHAE
HSA-5689896	Ovarian tumor domain proteases	7	38	0.0424	ENSP00000259808,ENSP00000269305,ENSP00000323889,ENSP00000351777,ENSP00000363019,ENSP00000378699,ENSP00000405330	CDK1,ESR1,RIPK1,TP53,TRIM25,UBE2D1,VCP
HSA-5651801	PCNA-Dependent Long Patch Base Excision Repair	5	21	0.0442	ENSP00000216714,ENSP00000263681,ENSP00000322570,ENSP00000371321,ENSP00000480186	APEX1,POLD2,POLD3,POLE,RFC1
HSA-9012852	Signaling by NOTCH3	8	48	0.045	ENSP00000225916,ENSP00000232424,ENSP00000261531,ENSP00000263253,ENSP00000263754,ENSP00000357348,ENSP00000361626,ENSP00000367714	EP300,HES1,HES5,HEY2,KAT2A,KAT2B,SNW1,YBX1
HSA-73777	RNA Polymerase I Chain Elongation	9	58	0.0455	ENSP00000261245,ENSP00000263857,ENSP00000302640,ENSP00000332194,ENSP00000336687,ENSP00000358151,ENSP00000366618,ENSP00000434024,ENSP00000476136	CBX3,H2AFX,HIST1H2BJ,HIST1H2BL,HIST2H2AC,HIST2H2BE,MNAT1,POLR1A,UBTF
HSA-5621481	C-type lectin receptors (CLRs)	16	134	0.0457	ENSP00000216802,ENSP00000226574,ENSP00000263253,ENSP00000293362,ENSP00000309474,ENSP00000310129,ENSP00000310572,ENSP00000316176,ENSP00000348442,ENSP00000359206,ENSP00000363019,ENSP00000363435,ENSP00000384273,ENSP00000391211,ENSP00000401802,ENSP00000481029	BTRC,EP300,ITPR3,NFKB1,PSMC2,PSMC3,PSMC5,PSMC6,PSMD1,PSMD12,PSMD2,PSME2,PSME3,RELA,UBE2D1,UBE2N
HSA-163765	ChREBP activates metabolic gene expression	3	7	0.0466	ENSP00000253792,ENSP00000304592,ENSP00000483300	ACACA,ACLY,FASN
HSA-3134963	DEx/H-box helicases activate type I IFN and inflammatory cytokines production	3	7	0.0466	ENSP00000226574,ENSP00000384273,ENSP00000417078	DHX36,NFKB1,RELA
HSA-165159	mTOR signalling	7	39	0.0469	ENSP00000219476,ENSP00000307272,ENSP00000324856,ENSP00000354558,ENSP00000369757,ENSP00000416255,ENSP00000451828	AKT1,EIF4G1,MTOR,RPS6,RPTOR,STK11,TSC2
HSA-5674135	MAP2K and MAPK activation	7	39	0.0469	ENSP00000211998,ENSP00000263025,ENSP00000268182,ENSP00000316029,ENSP00000358723,ENSP00000389715,ENSP00000403701	ARRB2,IQGAP1,KSR2,MAPK3,RAP1A,TLN1,VCL
HSA-6802946	Signaling by moderate kinase activity BRAF mutants	7	39	0.0469	ENSP00000211998,ENSP00000263025,ENSP00000268182,ENSP00000316029,ENSP00000358723,ENSP00000389715,ENSP00000403701	ARRB2,IQGAP1,KSR2,MAPK3,RAP1A,TLN1,VCL
HSA-6802955	Paradoxical activation of RAF signaling by kinase inactive BRAF	7	39	0.0469	ENSP00000211998,ENSP00000263025,ENSP00000268182,ENSP00000316029,ENSP00000358723,ENSP00000389715,ENSP00000403701	ARRB2,IQGAP1,KSR2,MAPK3,RAP1A,TLN1,VCL
HSA-168316	Assembly of Viral Components at the Budding Site	2	2	0.0486	ENSP00000247461,ENSP00000320866	CALR,CANX
HSA-192905	vRNP Assembly	2	2	0.0486	ENSP00000261574,ENSP00000335153	HSP90AA1,IPO5
HSA-5632968	Defective Mismatch Repair Associated With MSH6	2	2	0.0486	ENSP00000233146,ENSP00000234420	MSH2,MSH6
HSA-174411	Polymerase switching on the C-strand of the telomere	4	14	0.0489	ENSP00000263681,ENSP00000368349,ENSP00000371321,ENSP00000480186	POLA1,POLD2,POLD3,RFC1
HSA-198323	AKT phosphorylates targets in the cytosol	4	14	0.0489	ENSP00000219476,ENSP00000228872,ENSP00000258149,ENSP00000451828	AKT1,CDKN1B,MDM2,TSC2
HSA-203765	eNOS activation and regulation	4	14	0.0489	ENSP00000297494,ENSP00000335153,ENSP00000373905,ENSP00000451828	AKT1,DNM2,HSP90AA1,NOS3
HSA-5358565	Mismatch repair (MMR) directed by MSH2:MSH6 (MutSalpha)	4	14	0.0489	ENSP00000233146,ENSP00000234420,ENSP00000263681,ENSP00000480186	MSH2,MSH6,POLD2,POLD3
HSA-5637810	Constitutive Signaling by EGFRvIII	4	14	0.0489	ENSP00000264033,ENSP00000335153,ENSP00000401303,ENSP00000428056	CBL,HSP90AA1,PIK3R1,SHC1
HSA-6804116	TP53 Regulates Transcription of Genes Involved in G1 Cell Cycle Arrest	4	14	0.0489	ENSP00000228872,ENSP00000266970,ENSP00000269305,ENSP00000345571	CDK2,CDKN1B,E2F1,TP53
HSA-6804759	Regulation of TP53 Activity through Association with Co-factors	4	14	0.0489	ENSP00000264731,ENSP00000269305,ENSP00000367545,ENSP00000451828	AKT1,TP53,TP63,TP73
HSA-69091	Polymerase switching	4	14	0.0489	ENSP00000263681,ENSP00000368349,ENSP00000371321,ENSP00000480186	POLA1,POLD2,POLD3,RFC1
HSA-389357	CD28 dependent PI3K/Akt signaling	5	22	0.0494	ENSP00000296782,ENSP00000354558,ENSP00000357804,ENSP00000428056,ENSP00000451828	AKT1,MTOR,PIK3R1,RICTOR,THEM4
HSA-5205685	Pink/Parkin Mediated Mitophagy	5	22	0.0494	ENSP00000265333,ENSP00000268607,ENSP00000358072,ENSP00000410339,ENSP00000420617	ATG5,MAP1LC3B,MFN1,TOMM40,VDAC1
HSA-5620922	BBSome-mediated cargo-targeting to cilium	5	22	0.0494	ENSP00000280326,ENSP00000286788,ENSP00000295688,ENSP00000299300,ENSP00000317334	CCT2,CCT3,CCT5,CCT8,TCP1
HSA-8862803	Deregulated CDK5 triggers multiple neurodegenerative pathways in Alzheimer's disease models	5	22	0.0494	ENSP00000264335,ENSP00000284981,ENSP00000360266,ENSP00000385824,ENSP00000431984	APP,CAPN1,FOXO3,JUN,YWHAE

## Sheet: KEGG
Supplementary Data Sheet 1: Reactome and KEGG pathways for the SIRT interactors.
#term ID	term description	observed gene count	background gene count	false discovery rate	matching proteins in your network (IDs)	matching proteins in your network (labels)
hsa03008	Ribosome biogenesis in eukaryotes	37	76	1.13e-15	ENSP00000217244,ENSP00000221801,ENSP00000223073,ENSP00000225298,ENSP00000244230,ENSP00000257829,ENSP00000261708,ENSP00000262506,ENSP00000264279,ENSP00000264951,ENSP00000281701,ENSP00000291576,ENSP00000296792,ENSP00000297990,ENSP00000308179,ENSP00000314193,ENSP00000321449,ENSP00000327179,ENSP00000354040,ENSP00000355541,ENSP00000358400,ENSP00000362153,ENSP00000363574,ENSP00000363642,ENSP00000365042…	BMS1,CIRH1A,CSNK2A1,CSNK2A2,CSNK2B,EIF6,FBL,GNL2,GNL3,GTPBP4,HEATR1,MDN1,MPHOSPH10,NAT10,NOL6,NOP58,NVL,NXF1,POP1,PWP2,RBM28,RCL1,RIOK1,RRP7A,TBL3,TCOF1,UTP14A,UTP15,UTP18,UTP6,WDR3,WDR36,WDR43,WDR75,XPO1,XRN1,XRN2
hsa03013	RNA transport	49	159	1.05e-14	ENSP00000216190,ENSP00000216832,ENSP00000220849,ENSP00000229179,ENSP00000231498,ENSP00000245838,ENSP00000250113,ENSP00000254508,ENSP00000261396,ENSP00000262710,ENSP00000265351,ENSP00000283195,ENSP00000285873,ENSP00000285968,ENSP00000289371,ENSP00000290158,ENSP00000293831,ENSP00000310668,ENSP00000313007,ENSP00000316032,ENSP00000319169,ENSP00000321706,ENSP00000326261,ENSP00000327821,ENSP00000330842…	ACIN1,ALYREF,DDX20,EEF1A1,EIF3D,EIF3E,EIF3I,EIF4A1,EIF4G1,EIF4G3,EIF5B,FMR1,FXR1,FXR2,GEMIN4,GEMIN5,KPNB1,NCBP1,NUP107,NUP133,NUP153,NUP155,NUP160,NUP188,NUP205,NUP210,NUP214,NUP88,NUP93,NUP98,NXF1,PABPC1,PABPC4,PNN,POP1,PRMT5,RANBP2,RANGAP1,RGPD6,SEC13,SRRM1,THOC2,THOC5,TPR,UBE2I,UPF1,XPO1,XPO5,XPOT
hsa03040	Spliceosome	43	130	6.92e-14	ENSP00000156471,ENSP00000215793,ENSP00000245838,ENSP00000261531,ENSP00000261973,ENSP00000262415,ENSP00000262710,ENSP00000266079,ENSP00000268482,ENSP00000307863,ENSP00000310448,ENSP00000310723,ENSP00000317123,ENSP00000318861,ENSP00000335321,ENSP00000336741,ENSP00000350090,ENSP00000351137,ENSP00000359645,ENSP00000362820,ENSP00000362900,ENSP00000364289,ENSP00000364802,ENSP00000364805,ENSP00000365439…	ACIN1,ALYREF,AQR,CHERP,CRNKL1,CWC15,DDX23,DDX42,DDX46,DHX15,DHX16,DHX38,DHX8,EFTUD2,HNRNPA1L2,HNRNPA3,HNRNPK,HSPA1A,HSPA1L,HSPA2,HSPA8,NCBP1,PRPF40A,PRPF6,PRPF8,PUF60,RBM25,RBMX,SART1,SF3A1,SF3B1,SF3B2,SNRNP200,SNRNP70,SNW1,SRSF2,SRSF3,SRSF4,SRSF5,THOC2,U2AF2,U2SURP,XAB2
hsa03010	Ribosome	41	130	9.27e-13	ENSP00000199706,ENSP00000222247,ENSP00000225430,ENSP00000230050,ENSP00000251453,ENSP00000258455,ENSP00000262584,ENSP00000296674,ENSP00000309334,ENSP00000309830,ENSP00000311430,ENSP00000315017,ENSP00000322419,ENSP00000339095,ENSP00000339795,ENSP00000341885,ENSP00000346001,ENSP00000346027,ENSP00000346037,ENSP00000346050,ENSP00000346067,ENSP00000348849,ENSP00000359345,ENSP00000361076,ENSP00000362744…	MRPL1,MRPL28,MRPS9,RPL10,RPL10A,RPL14,RPL15,RPL18A,RPL19,RPL21,RPL23A,RPL26,RPL3,RPL30,RPL38,RPL4,RPL5,RPL6,RPL7,RPL7A,RPL8,RPL9,RPLP0,RPLP1,RPLP2,RPS10,RPS12,RPS14,RPS15,RPS16,RPS19,RPS2,RPS23,RPS24,RPS26,RPS3A,RPS4X,RPS5,RPS6,RPS7,RPSA
hsa04110	Cell cycle	36	123	1.87e-10	ENSP00000216122,ENSP00000218089,ENSP00000228872,ENSP00000234296,ENSP00000256442,ENSP00000258149,ENSP00000262105,ENSP00000262133,ENSP00000263253,ENSP00000264156,ENSP00000264335,ENSP00000265734,ENSP00000266970,ENSP00000267163,ENSP00000269305,ENSP00000274255,ENSP00000278616,ENSP00000287598,ENSP00000297338,ENSP00000313420,ENSP00000323421,ENSP00000339109,ENSP00000345571,ENSP00000354720,ENSP00000361540…	ANAPC1,ANAPC7,ATM,BUB1B,CCNB1,CDC14B,CDC20,CDC23,CDC27,CDK1,CDK2,CDK6,CDKN1B,CHEK2,E2F1,EP300,FZR1,HDAC1,HDAC2,MCM4,MCM5,MCM6,MDM2,MYC,ORC2,PRKDC,RAD21,RB1,RBL1,RBL2,SKP2,SMC1A,SMC3,STAG2,TP53,YWHAE
hsa04218	Cellular senescence	39	156	1e-09	ENSP00000212015,ENSP00000219476,ENSP00000226574,ENSP00000256442,ENSP00000258149,ENSP00000262133,ENSP00000263025,ENSP00000265333,ENSP00000265433,ENSP00000265734,ENSP00000266970,ENSP00000267163,ENSP00000269305,ENSP00000278616,ENSP00000311360,ENSP00000325863,ENSP00000326031,ENSP00000341779,ENSP00000342307,ENSP00000345571,ENSP00000354558,ENSP00000359206,ENSP00000360671,ENSP00000362592,ENSP00000362768…	AKT1,ATM,BTRC,CAPN1,CCNB1,CDK1,CDK2,CDK6,CHEK2,E2F1,FOXM1,FOXO1,FOXO3,HIPK2,ITPR3,MAPK3,MDM2,MRE11A,MTOR,MYC,NBN,NFKB1,PIK3R1,PPP1CA,PPP1CB,PPP1CC,RAD50,RAD9A,RB1,RBBP4,RBL1,RBL2,RELA,SIRT1,SLC25A5,SLC25A6,TP53,TSC2,VDAC1
hsa05169	Epstein-Barr virus infection	44	194	1e-09	ENSP00000217244,ENSP00000226574,ENSP00000228872,ENSP00000258149,ENSP00000259808,ENSP00000261531,ENSP00000262506,ENSP00000263253,ENSP00000264335,ENSP00000264606,ENSP00000264657,ENSP00000266970,ENSP00000267163,ENSP00000269305,ENSP00000274255,ENSP00000309474,ENSP00000310129,ENSP00000310572,ENSP00000343204,ENSP00000343535,ENSP00000346762,ENSP00000348442,ENSP00000352400,ENSP00000360266,ENSP00000362649…	AKT1,CDK1,CDK2,CDKN1B,CSNK2A1,CSNK2A2,CSNK2B,EP300,HDAC1,HDAC2,HDAC4,HSPA1A,HSPA1L,HSPA2,HSPA8,JAK1,JUN,MAP2K4,MAPK8,MDM2,MYC,NFKB1,NUP214,PIK3R1,POLR2A,PSMC2,PSMC3,PSMC5,PSMC6,PSMD1,PSMD12,PSMD2,RB1,RELA,RIPK1,SKP2,SND1,SNW1,STAT3,TP53,USP7,VIM,XPO1,YWHAE
hsa05203	Viral carcinogenesis	42	183	1.56e-09	ENSP00000225916,ENSP00000226574,ENSP00000228872,ENSP00000252699,ENSP00000258149,ENSP00000259873,ENSP00000261531,ENSP00000262133,ENSP00000263025,ENSP00000263253,ENSP00000263754,ENSP00000264335,ENSP00000264606,ENSP00000264657,ENSP00000265734,ENSP00000266970,ENSP00000267163,ENSP00000269305,ENSP00000274255,ENSP00000301764,ENSP00000302967,ENSP00000334061,ENSP00000343204,ENSP00000343535,ENSP00000346762…	ACTN1,ACTN4,CDC20,CDK1,CDK2,CDK6,CDKN1B,CHD4,CREB1,DDB1,EP300,GTF2A1,HDAC1,HDAC2,HDAC3,HDAC4,HDAC6,HIST1H2BJ,HIST1H2BL,HIST2H2BE,HNRNPK,JAK1,JUN,KAT2A,KAT2B,MAPK3,MDM2,MRPS18B,NFKB1,PIK3R1,RB1,RBL1,RBL2,RELA,SKP2,SND1,SNW1,STAT3,TP53,UBR4,USP7,YWHAE
hsa01200	Carbon metabolism	30	116	7.79e-08	ENSP00000205402,ENSP00000222673,ENSP00000229239,ENSP00000253382,ENSP00000264932,ENSP00000265838,ENSP00000277865,ENSP00000280346,ENSP00000307241,ENSP00000316924,ENSP00000321070,ENSP00000331897,ENSP00000333667,ENSP00000335304,ENSP00000345282,ENSP00000355518,ENSP00000357535,ENSP00000359991,ENSP00000362413,ENSP00000364649,ENSP00000365462,ENSP00000367923,ENSP00000369134,ENSP00000370023,ENSP00000370517…	ACAT1,ACSS1,ACSS2,CPS1,DLAT,DLD,DLST,ECHS1,FH,G6PD,GAPDH,GLUD1,GPT2,HADHA,HK1,IDH2,ME2,OGDH,PC,PCCA,PDHA1,PDHB,PFKP,PGAM1,PGK1,SDHA,SDHB,SHMT2,SUCLA2,SUCLG2
hsa04120	Ubiquitin mediated proteolysis	32	134	1.1e-07	ENSP00000219548,ENSP00000249636,ENSP00000256474,ENSP00000258149,ENSP00000261609,ENSP00000262971,ENSP00000263228,ENSP00000264033,ENSP00000264122,ENSP00000268058,ENSP00000274255,ENSP00000301764,ENSP00000316176,ENSP00000323687,ENSP00000339109,ENSP00000340648,ENSP00000348056,ENSP00000359206,ENSP00000361540,ENSP00000363019,ENSP00000364589,ENSP00000373696,ENSP00000376765,ENSP00000378350,ENSP00000378529…	ANAPC1,ANAPC7,BIRC6,BTRC,CBL,CBLB,CDC20,CDC23,CDC27,CUL4A,CUL4B,CUL7,DDB1,FZR1,HERC2,HUWE1,MDM2,PIAS1,PIAS2,PIAS3,PIAS4,PML,SKP2,STUB1,TRIP12,UBE2D1,UBE2I,UBE2N,UBE2O,UBE2R2,UBR5,VHL
hsa00020	Citrate cycle (TCA cycle)	16	30	1.2e-07	ENSP00000205402,ENSP00000216780,ENSP00000222673,ENSP00000253792,ENSP00000264932,ENSP00000280346,ENSP00000307241,ENSP00000319814,ENSP00000331897,ENSP00000335304,ENSP00000355518,ENSP00000364649,ENSP00000367923,ENSP00000369134,ENSP00000377532,ENSP00000419325	ACLY,DLAT,DLD,DLST,FH,IDH2,OGDH,PC,PCK1,PCK2,PDHA1,PDHB,SDHA,SDHB,SUCLA2,SUCLG2
hsa04931	Insulin resistance	27	107	5.61e-07	ENSP00000216392,ENSP00000216780,ENSP00000216962,ENSP00000226574,ENSP00000253727,ENSP00000253778,ENSP00000264657,ENSP00000264867,ENSP00000297494,ENSP00000304895,ENSP00000317904,ENSP00000319814,ENSP00000326031,ENSP00000341779,ENSP00000348069,ENSP00000349860,ENSP00000354558,ENSP00000365016,ENSP00000368880,ENSP00000378769,ENSP00000378974,ENSP00000384273,ENSP00000385523,ENSP00000387699,ENSP00000428056…	AKT1,CREB1,FOXO1,GFPT1,GFPT2,GYS1,IRS1,IRS2,MAPK8,MTOR,NFKB1,NOS3,NR1H2,NR1H3,PCK1,PCK2,PIK3R1,PPARA,PPARGC1A,PPP1CA,PPP1CB,PPP1CC,PYGB,PYGL,RELA,SREBF1,STAT3
hsa05168	Herpes simplex infection	36	181	5.95e-07	ENSP00000217244,ENSP00000226574,ENSP00000229330,ENSP00000246802,ENSP00000254657,ENSP00000262506,ENSP00000263228,ENSP00000263253,ENSP00000266970,ENSP00000268058,ENSP00000269305,ENSP00000274255,ENSP00000306245,ENSP00000308741,ENSP00000309555,ENSP00000326031,ENSP00000341779,ENSP00000343204,ENSP00000343535,ENSP00000360266,ENSP00000362820,ENSP00000362900,ENSP00000362931,ENSP00000365042,ENSP00000365439…	ALYREF,ARNTL,CDK1,CDK2,CLOCK,CSNK2A1,CSNK2A2,CSNK2B,EP300,FOS,GLTSCR2,GTF2I,HCFC1,HCFC2,HNRNPK,JAK1,JUN,MAPK8,NFKB1,NXF1,PER2,PML,POLR2A,PPP1CA,PPP1CB,PPP1CC,RELA,SKP2,SRPK1,SRSF2,SRSF3,SRSF4,SRSF5,TP53,UBE2R2,USP7
hsa04068	FoxO signaling pathway	29	130	1.49e-06	ENSP00000212015,ENSP00000216780,ENSP00000228872,ENSP00000256442,ENSP00000258149,ENSP00000262133,ENSP00000263025,ENSP00000263253,ENSP00000264657,ENSP00000266458,ENSP00000266970,ENSP00000274031,ENSP00000274255,ENSP00000278616,ENSP00000304895,ENSP00000319814,ENSP00000324856,ENSP00000343535,ENSP00000361202,ENSP00000361892,ENSP00000363377,ENSP00000365016,ENSP00000368880,ENSP00000378974,ENSP00000384371…	AKT1,ATM,BCL6,CCNB1,CDK2,CDKN1B,EP300,FOXO1,FOXO3,FOXO4,GABARAPL1,IRS1,IRS2,IRS4,MAPK3,MAPK8,MDM2,PCK1,PCK2,PIK3R1,PRMT1,RBL2,SETD7,SIRT1,SKP2,STAT3,STK11,STK4,USP7
hsa05206	MicroRNAs in cancer	31	149	1.96e-06	ENSP00000212015,ENSP00000226574,ENSP00000228872,ENSP00000258149,ENSP00000260363,ENSP00000263253,ENSP00000264606,ENSP00000264657,ENSP00000264731,ENSP00000265734,ENSP00000269305,ENSP00000278616,ENSP00000304895,ENSP00000307272,ENSP00000317379,ENSP00000320147,ENSP00000328547,ENSP00000345571,ENSP00000348056,ENSP00000352516,ENSP00000354487,ENSP00000354558,ENSP00000356042,ENSP00000362649,ENSP00000365016…	ATM,CDK6,CDKN1B,DICER1,DNMT1,DNMT3B,E2F1,EP300,EZH2,EZR,FSCN1,GLS,HDAC1,HDAC4,HNRNPK,IRS1,IRS2,KIF23,MDM2,MTOR,MYC,NFKB1,RPTOR,SHC1,SIRT1,STAT3,TP53,TP63,UBE2I,VIM,ZEB1
hsa05166	HTLV-I infection	42	250	2.35e-06	ENSP00000005340,ENSP00000225916,ENSP00000226574,ENSP00000247461,ENSP00000263253,ENSP00000263681,ENSP00000263754,ENSP00000265333,ENSP00000267163,ENSP00000269305,ENSP00000278616,ENSP00000287598,ENSP00000306245,ENSP00000316029,ENSP00000316054,ENSP00000320866,ENSP00000322570,ENSP00000339109,ENSP00000340330,ENSP00000343204,ENSP00000344456,ENSP00000345571,ENSP00000350681,ENSP00000352925,ENSP00000360266…	AKT1,ANAPC1,ANAPC7,ATM,BUB1B,CALR,CANX,CDC20,CDC23,CDC27,CHEK2,CREB1,CTNNB1,DVL1,DVL2,DVL3,E2F1,ELK4,EP300,FOS,JAK1,JUN,KAT2A,KAT2B,KAT5,MAP2K4,MAPK8,MYC,NFKB1,PIK3R1,POLD2,POLD3,POLE,RB1,RELA,SLC25A5,SLC25A6,TLN1,TP53,TRRAP,VDAC1,XPO1
hsa05202	Transcriptional misregulation in cancer	33	169	2.48e-06	ENSP00000226574,ENSP00000228872,ENSP00000252674,ENSP00000254066,ENSP00000254108,ENSP00000254657,ENSP00000258149,ENSP00000268058,ENSP00000268712,ENSP00000269305,ENSP00000278616,ENSP00000281043,ENSP00000283921,ENSP00000287820,ENSP00000329357,ENSP00000340874,ENSP00000350681,ENSP00000351490,ENSP00000354487,ENSP00000362361,ENSP00000362649,ENSP00000368880,ENSP00000369695,ENSP00000372351,ENSP00000376568…	ATM,BCL6,CDK9,CDKN1B,DOT1L,ELK4,EWSR1,FOXO1,FUS,HDAC1,HDAC2,HOXA10,KMT2A,MAX,MDM2,MEF2C,MLF1,MLLT1,MLLT3,MYC,MYCN,NCOR1,NFKB1,PER2,PML,PPARG,RARA,RELA,SP1,TAF15,TP53,WHSC1,ZEB1
hsa04152	AMPK signaling pathway	27	120	2.79e-06	ENSP00000212015,ENSP00000216780,ENSP00000219476,ENSP00000262430,ENSP00000264867,ENSP00000287820,ENSP00000304592,ENSP00000304895,ENSP00000307272,ENSP00000307940,ENSP00000312987,ENSP00000317904,ENSP00000319814,ENSP00000324804,ENSP00000324856,ENSP00000348069,ENSP00000354558,ENSP00000361202,ENSP00000365016,ENSP00000368880,ENSP00000370517,ENSP00000385269,ENSP00000385824,ENSP00000387699,ENSP00000428056…	ACACA,AKT1,CREB1,EEF2,ELAVL1,FASN,FOXO1,FOXO3,GYS1,HNF4A,IRS1,IRS2,IRS4,MLYCD,MTOR,PCK1,PCK2,PFKP,PIK3R1,PPARG,PPARGC1A,PPP2R1A,RPTOR,SIRT1,SREBF1,STK11,TSC2
hsa04910	Insulin signaling pathway	28	134	5.85e-06	ENSP00000216392,ENSP00000216780,ENSP00000216962,ENSP00000219476,ENSP00000263025,ENSP00000264033,ENSP00000264122,ENSP00000264867,ENSP00000304592,ENSP00000304895,ENSP00000307272,ENSP00000317904,ENSP00000319814,ENSP00000326031,ENSP00000341779,ENSP00000348069,ENSP00000354558,ENSP00000361202,ENSP00000365016,ENSP00000368880,ENSP00000369757,ENSP00000378769,ENSP00000378974,ENSP00000401303,ENSP00000402103…	ACACA,AKT1,CBL,CBLB,FASN,FOXO1,GYS1,HK1,IRS1,IRS2,IRS4,MAPK3,MAPK8,MTOR,PCK1,PCK2,PIK3R1,PPARGC1A,PPP1CA,PPP1CB,PPP1CC,PYGB,PYGL,RPS6,RPTOR,SHC1,SREBF1,TSC2
hsa00640	Propanoate metabolism	13	32	2.1e-05	ENSP00000205402,ENSP00000253382,ENSP00000262430,ENSP00000265838,ENSP00000269980,ENSP00000316924,ENSP00000357535,ENSP00000359151,ENSP00000365462,ENSP00000367923,ENSP00000370023,ENSP00000419325,ENSP00000483300	ACACA,ACAT1,ACSS1,ACSS2,BCKDHA,DBT,DLD,ECHS1,HADHA,MLYCD,PCCA,SUCLA2,SUCLG2
hsa04211	Longevity regulating pathway	21	88	2.43e-05	ENSP00000212015,ENSP00000219476,ENSP00000226574,ENSP00000264867,ENSP00000269305,ENSP00000287820,ENSP00000304895,ENSP00000307272,ENSP00000324856,ENSP00000354558,ENSP00000358072,ENSP00000361202,ENSP00000364678,ENSP00000365016,ENSP00000368880,ENSP00000384273,ENSP00000385824,ENSP00000387699,ENSP00000417980,ENSP00000428056,ENSP00000451828	AKT1,ATG5,CREB1,EHMT1,EHMT2,FOXO1,FOXO3,IRS1,IRS2,IRS4,MTOR,NFKB1,PIK3R1,PPARG,PPARGC1A,RELA,RPTOR,SIRT1,STK11,TP53,TSC2
hsa00310	Lysine degradation	17	59	2.5e-05	ENSP00000196061,ENSP00000222214,ENSP00000222673,ENSP00000261733,ENSP00000265838,ENSP00000274031,ENSP00000320147,ENSP00000335304,ENSP00000337976,ENSP00000357535,ENSP00000364678,ENSP00000370023,ENSP00000372351,ENSP00000381657,ENSP00000395929,ENSP00000417980,ENSP00000436786	ACAT1,ALDH2,DLST,DOT1L,ECHS1,EHMT1,EHMT2,EZH2,GCDH,HADHA,KMT2A,NSD1,OGDH,PLOD1,SETD7,SUV39H1,WHSC1
hsa00620	Pyruvate metabolism	14	39	2.5e-05	ENSP00000205402,ENSP00000216780,ENSP00000253382,ENSP00000261733,ENSP00000265838,ENSP00000280346,ENSP00000307241,ENSP00000316924,ENSP00000319814,ENSP00000321070,ENSP00000355518,ENSP00000369134,ENSP00000377532,ENSP00000483300	ACACA,ACAT1,ACSS1,ACSS2,ALDH2,DLAT,DLD,FH,ME2,PC,PCK1,PCK2,PDHA1,PDHB
hsa04213	Longevity regulating pathway - multiple species	17	61	3.48e-05	ENSP00000212015,ENSP00000304895,ENSP00000307272,ENSP00000354558,ENSP00000358072,ENSP00000361202,ENSP00000362649,ENSP00000364802,ENSP00000364805,ENSP00000365016,ENSP00000368880,ENSP00000378199,ENSP00000385824,ENSP00000428056,ENSP00000430432,ENSP00000432083,ENSP00000451828	AKT1,ATG5,FOXO1,FOXO3,HDAC1,HDAC2,HSPA1A,HSPA1L,HSPA2,HSPA8,IRS1,IRS2,IRS4,MTOR,PIK3R1,RPTOR,SIRT1
hsa05230	Central carbon metabolism in cancer	17	65	6.87e-05	ENSP00000263025,ENSP00000269305,ENSP00000307241,ENSP00000317379,ENSP00000337332,ENSP00000354558,ENSP00000359991,ENSP00000369134,ENSP00000370517,ENSP00000372191,ENSP00000376352,ENSP00000377192,ENSP00000402103,ENSP00000428056,ENSP00000437955,ENSP00000451828,ENSP00000479618	AKT1,G6PD,GLS,HIF1A,HK1,MAPK3,MTOR,MYC,PDHA1,PDHB,PDK1,PFKP,PGAM1,PIK3R1,SIRT3,SIRT6,TP53
hsa05215	Prostate cancer	21	97	7.31e-05	ENSP00000226574,ENSP00000228872,ENSP00000258149,ENSP00000263025,ENSP00000263253,ENSP00000266970,ENSP00000267163,ENSP00000269305,ENSP00000299767,ENSP00000335153,ENSP00000344456,ENSP00000345571,ENSP00000354487,ENSP00000354558,ENSP00000363822,ENSP00000368880,ENSP00000381607,ENSP00000384273,ENSP00000387699,ENSP00000428056,ENSP00000451828	AKT1,AR,CDK2,CDKN1B,CREB1,CTNNB1,E2F1,EP300,FOXO1,GSTP1,HSP90AA1,HSP90B1,MAPK3,MDM2,MTOR,NFKB1,PIK3R1,RB1,RELA,TP53,ZEB1
hsa04919	Thyroid hormone signaling pathway	23	115	8.2e-05	ENSP00000219476,ENSP00000225916,ENSP00000258149,ENSP00000263025,ENSP00000263253,ENSP00000263754,ENSP00000268712,ENSP00000269305,ENSP00000302967,ENSP00000344456,ENSP00000354558,ENSP00000362649,ENSP00000363193,ENSP00000368880,ENSP00000370517,ENSP00000405330,ENSP00000428056,ENSP00000430432,ENSP00000437955,ENSP00000440045,ENSP00000445306,ENSP00000451828,ENSP00000479618	AKT1,ATP1A1,ATP2A2,CTNNB1,EP300,ESR1,FOXO1,HDAC1,HDAC2,HDAC3,HIF1A,KAT2A,KAT2B,MAPK3,MDM2,MED12,MTOR,MYC,NCOR1,PFKP,PIK3R1,TP53,TSC2
hsa05016	Huntington's disease	31	193	0.00013	ENSP00000203407,ENSP00000215375,ENSP00000225174,ENSP00000233627,ENSP00000252711,ENSP00000262030,ENSP00000263253,ENSP00000264867,ENSP00000264932,ENSP00000265333,ENSP00000266544,ENSP00000268379,ENSP00000269305,ENSP00000287820,ENSP00000309565,ENSP00000322450,ENSP00000329357,ENSP00000356972,ENSP00000360671,ENSP00000362649,ENSP00000364649,ENSP00000370808,ENSP00000376924,ENSP00000381736,ENSP00000387699…	AP2B1,ATP5A1,ATP5B,ATP5D,CLTC,CREB1,EP300,GPX1,HDAC1,HDAC2,NDUFA10,NDUFA9,NDUFS1,NDUFS2,NDUFS7,NDUFV1,NRF1,POLR2A,PPARG,PPARGC1A,PPIF,SDHA,SDHB,SLC25A5,SLC25A6,SP1,TP53,UQCRC1,UQCRC2,UQCRH,VDAC1
hsa00280	Valine, leucine and isoleucine degradation	14	48	0.00014	ENSP00000168216,ENSP00000205402,ENSP00000261733,ENSP00000265594,ENSP00000265838,ENSP00000269980,ENSP00000343657,ENSP00000357535,ENSP00000359151,ENSP00000363614,ENSP00000365462,ENSP00000370023,ENSP00000418397,ENSP00000479130	ACAT1,ACSF3,ALDH2,BCKDHA,DBT,DLD,ECHS1,HADHA,HMGCL,HSD17B10,IVD,MCCC1,MCCC2,PCCA
hsa04066	HIF-1 signaling pathway	20	98	0.00022	ENSP00000226574,ENSP00000228872,ENSP00000229239,ENSP00000250457,ENSP00000256474,ENSP00000263025,ENSP00000263253,ENSP00000264657,ENSP00000297494,ENSP00000307241,ENSP00000354558,ENSP00000362413,ENSP00000369134,ENSP00000369757,ENSP00000376352,ENSP00000384273,ENSP00000402103,ENSP00000428056,ENSP00000437955,ENSP00000451828	AKT1,CDKN1B,EGLN3,EP300,GAPDH,HIF1A,HK1,MAPK3,MTOR,NFKB1,NOS3,PDHA1,PDHB,PDK1,PGK1,PIK3R1,RELA,RPS6,STAT3,VHL
hsa05220	Chronic myeloid leukemia	17	76	0.00032	ENSP00000226574,ENSP00000228872,ENSP00000258149,ENSP00000263025,ENSP00000264033,ENSP00000264674,ENSP00000265734,ENSP00000267163,ENSP00000269305,ENSP00000345571,ENSP00000362649,ENSP00000384273,ENSP00000401303,ENSP00000428056,ENSP00000430432,ENSP00000451828,ENSP00000479618	AKT1,CBL,CDK6,CDKN1B,E2F1,HDAC1,HDAC2,MAPK3,MDM2,MECOM,MYC,NFKB1,PIK3R1,RB1,RELA,SHC1,TP53
hsa03018	RNA degradation	17	77	0.00035	ENSP00000230640,ENSP00000264951,ENSP00000297185,ENSP00000313007,ENSP00000320949,ENSP00000351596,ENSP00000351811,ENSP00000361949,ENSP00000364543,ENSP00000366135,ENSP00000366396,ENSP00000366997,ENSP00000370517,ENSP00000373620,ENSP00000387911,ENSP00000400646,ENSP00000417078	CNOT1,DHX36,DIS3,EDC4,EXOSC10,HSPA9,HSPD1,PABPC1,PABPC4,PARN,PFKP,PNPT1,SKIV2L,SKIV2L2,TTC37,XRN1,XRN2
hsa04137	Mitophagy - animal	15	63	0.00046	ENSP00000217244,ENSP00000262506,ENSP00000266458,ENSP00000269305,ENSP00000329357,ENSP00000345571,ENSP00000358072,ENSP00000360266,ENSP00000365042,ENSP00000378974,ENSP00000384273,ENSP00000385824,ENSP00000420617,ENSP00000437955,ENSP00000438465	ATG5,CSNK2A1,CSNK2A2,CSNK2B,E2F1,FOXO3,GABARAPL1,HIF1A,JUN,MAPK8,MFN1,PGAM5,RELA,SP1,TP53
hsa03015	mRNA surveillance pathway	18	89	0.00054	ENSP00000216277,ENSP00000216832,ENSP00000238112,ENSP00000245934,ENSP00000262710,ENSP00000300291,ENSP00000313007,ENSP00000324804,ENSP00000326031,ENSP00000326261,ENSP00000341779,ENSP00000361949,ENSP00000364289,ENSP00000378769,ENSP00000421592,ENSP00000436679,ENSP00000470142,ENSP00000484669	ACIN1,ALYREF,CPSF1,CPSF3,NCBP1,NUDT21,NXF1,PABPC1,PABPC4,PAPOLA,PNN,PPP1CA,PPP1CB,PPP1CC,PPP2R1A,SRRM1,SYMPK,UPF1
hsa05200	Pathways in cancer	58	515	0.00058	ENSP00000005340,ENSP00000226574,ENSP00000228682,ENSP00000228872,ENSP00000232424,ENSP00000233146,ENSP00000234420,ENSP00000250457,ENSP00000254066,ENSP00000256474,ENSP00000258149,ENSP00000263025,ENSP00000263253,ENSP00000263734,ENSP00000264033,ENSP00000264657,ENSP00000264664,ENSP00000264674,ENSP00000265734,ENSP00000266970,ENSP00000267163,ENSP00000268058,ENSP00000269305,ENSP00000274255,ENSP00000287820…	AKT1,AR,CBL,CDK2,CDK6,CDKN1B,CTNNA1,CTNNB1,DVL1,DVL2,DVL3,E2F1,EGLN3,EP300,EPAS1,ESR1,ESR2,FGF10,FH,FOS,FOXO1,GLI1,GSTP1,GSTT2B,HDAC1,HDAC2,HES1,HES5,HEY2,HIF1A,HSP90AA1,HSP90B1,JAK1,JUN,LAMA3,MAPK3,MAPK8,MAX,MDM2,MECOM,MSH2,MSH6,MTOR,MYC,NFKB1,PIK3R1,PML,PPARG,RARA,RB1,RELA,SKP2,SP1,STAT3,STK4,TP53,TPR,VHL
hsa04922	Glucagon signaling pathway	19	100	0.00067	ENSP00000212015,ENSP00000216392,ENSP00000216780,ENSP00000216962,ENSP00000263253,ENSP00000264867,ENSP00000307241,ENSP00000317904,ENSP00000319814,ENSP00000359991,ENSP00000363435,ENSP00000368880,ENSP00000369134,ENSP00000385523,ENSP00000387699,ENSP00000406162,ENSP00000450864,ENSP00000451828,ENSP00000483300	ACACA,AKT1,CREB1,EP300,FOXO1,GYS1,ITPR3,PCK1,PCK2,PDHA1,PDHB,PGAM1,PPARA,PPARGC1A,PRMT1,PYGB,PYGL,SIRT1,SMEK1
hsa04141	Protein processing in endoplasmic reticulum	25	161	0.00099	ENSP00000219548,ENSP00000237530,ENSP00000247461,ENSP00000259253,ENSP00000286091,ENSP00000299767,ENSP00000306881,ENSP00000320866,ENSP00000324173,ENSP00000327801,ENSP00000335153,ENSP00000338844,ENSP00000340466,ENSP00000343405,ENSP00000351777,ENSP00000363019,ENSP00000364802,ENSP00000364805,ENSP00000369127,ENSP00000373312,ENSP00000378199,ENSP00000378974,ENSP00000431984,ENSP00000432083,ENSP00000480150	CALR,CANX,CAPN1,DNAJA1,GANAB,HSP90AA1,HSP90B1,HSPA1A,HSPA1L,HSPA2,HSPA5,HSPA8,HYOU1,MAPK8,P4HB,PDIA4,RPN2,SEC13,SEC23A,SEC23B,SEC24C,STUB1,UBE2D1,UGGT1,VCP
hsa04920	Adipocytokine signaling pathway	15	69	0.00099	ENSP00000216780,ENSP00000226574,ENSP00000264657,ENSP00000264867,ENSP00000304895,ENSP00000319814,ENSP00000324856,ENSP00000350012,ENSP00000354558,ENSP00000361202,ENSP00000365016,ENSP00000378974,ENSP00000384273,ENSP00000385523,ENSP00000451828	ACSL3,AKT1,IRS1,IRS2,IRS4,MAPK8,MTOR,NFKB1,PCK1,PCK2,PPARA,PPARGC1A,RELA,STAT3,STK11
hsa04114	Oocyte meiosis	20	116	0.0013	ENSP00000216911,ENSP00000256442,ENSP00000263025,ENSP00000264335,ENSP00000266970,ENSP00000323421,ENSP00000324804,ENSP00000326031,ENSP00000339109,ENSP00000341779,ENSP00000354720,ENSP00000359206,ENSP00000361540,ENSP00000363435,ENSP00000363822,ENSP00000378350,ENSP00000378699,ENSP00000378769,ENSP00000394394,ENSP00000434614	ANAPC1,ANAPC7,AR,AURKA,BTRC,CCNB1,CDC20,CDC23,CDC27,CDK1,CDK2,ITPR3,MAPK3,PPP1CA,PPP1CB,PPP1CC,PPP2R1A,SMC1A,SMC3,YWHAE
hsa01100	Metabolic pathways	114	1250	0.0014	ENSP00000168216,ENSP00000175506,ENSP00000203407,ENSP00000205402,ENSP00000215375,ENSP00000216392,ENSP00000216780,ENSP00000216962,ENSP00000217426,ENSP00000222214,ENSP00000222673,ENSP00000227868,ENSP00000228740,ENSP00000229239,ENSP00000230792,ENSP00000233627,ENSP00000236959,ENSP00000237530,ENSP00000242375,ENSP00000252711,ENSP00000253382,ENSP00000253778,ENSP00000253792,ENSP00000261733,ENSP00000262030…	ACACA,ACADVL,ACAT1,ACLY,ACSL3,ACSS1,ACSS2,AHCY,AKR1D1,ALAS1,ALDH18A1,ALDH2,ASNS,ASS1,ATIC,ATP5A1,ATP5B,ATP5D,BCKDHA,CAD,CKB,CPOX,CPS1,DBT,DEGS1,DLAT,DLD,DLST,DNMT1,DNMT3B,ECHS1,FASN,FECH,FH,FLAD1,G6PD,GANAB,GAPDH,GART,GCDH,GFPT1,GFPT2,GLS,GLUD1,GMPS,GPAM,GPT2,GYG2,GYS1,HADHA,HK1,HMGCL,HSD17B10,IDH2,IMPDH2,ITPK1,IVD,KYNU,LAMA3,LTA4H,MCCC1,MCCC2,MLYCD,MTHFD1L,NADK2,NDUFA10,NDUFA9,NDUFS1,NDUFS2,NDUF…
hsa05165	Human papillomavirus infection	39	317	0.0015	ENSP00000005340,ENSP00000219255,ENSP00000219476,ENSP00000226574,ENSP00000228872,ENSP00000232424,ENSP00000257570,ENSP00000258149,ENSP00000262133,ENSP00000263025,ENSP00000263253,ENSP00000264606,ENSP00000265734,ENSP00000266970,ENSP00000267163,ENSP00000269305,ENSP00000278616,ENSP00000302967,ENSP00000316054,ENSP00000324532,ENSP00000324804,ENSP00000334061,ENSP00000343204,ENSP00000344456,ENSP00000345571…	AKT1,ATM,CDK2,CDK6,CDKN1B,CHD4,CREB1,CTNNB1,DVL1,DVL2,DVL3,E2F1,EP300,FOXO1,HDAC1,HDAC2,HDAC3,HDAC4,HDAC6,HES1,HES5,HEY2,JAK1,LAMA3,MAPK3,MDM2,MTOR,NFKB1,OASL,PARD6A,PIK3R1,PPP2R1A,RB1,RBL1,RBL2,RELA,TP53,TSC2,UBR4
hsa05224	Breast cancer	23	147	0.0015	ENSP00000005340,ENSP00000232424,ENSP00000263025,ENSP00000264664,ENSP00000265734,ENSP00000267163,ENSP00000269305,ENSP00000306245,ENSP00000316054,ENSP00000329357,ENSP00000343925,ENSP00000344456,ENSP00000345571,ENSP00000354558,ENSP00000357348,ENSP00000360266,ENSP00000367714,ENSP00000368169,ENSP00000401303,ENSP00000405330,ENSP00000428056,ENSP00000451828,ENSP00000479618	AKT1,CDK6,CTNNB1,DVL1,DVL2,DVL3,E2F1,ESR1,ESR2,FGF10,FOS,HES1,HES5,HEY2,JUN,MAPK3,MTOR,MYC,PIK3R1,RB1,SHC1,SP1,TP53
hsa05010	Alzheimer's disease	25	168	0.0016	ENSP00000168216,ENSP00000203407,ENSP00000215375,ENSP00000229239,ENSP00000233627,ENSP00000252711,ENSP00000262030,ENSP00000263025,ENSP00000264932,ENSP00000265986,ENSP00000266376,ENSP00000266544,ENSP00000268379,ENSP00000284981,ENSP00000309565,ENSP00000322450,ENSP00000337838,ENSP00000340820,ENSP00000356972,ENSP00000363435,ENSP00000364649,ENSP00000381736,ENSP00000392709,ENSP00000431984,ENSP00000440045	APP,ATP2A2,ATP5A1,ATP5B,ATP5D,CACNA1C,CAPN1,GAPDH,HSD17B10,IDE,ITPR3,MAPK3,MAPT,NDUFA10,NDUFA9,NDUFS1,NDUFS2,NDUFS7,NDUFV1,RTN4,SDHA,SDHB,UQCRC1,UQCRC2,UQCRH
hsa05164	Influenza A	25	168	0.0016	ENSP00000226574,ENSP00000263025,ENSP00000263253,ENSP00000265333,ENSP00000268058,ENSP00000316032,ENSP00000323889,ENSP00000343204,ENSP00000360266,ENSP00000364802,ENSP00000364805,ENSP00000370808,ENSP00000375863,ENSP00000378199,ENSP00000378974,ENSP00000384273,ENSP00000384863,ENSP00000387334,ENSP00000410402,ENSP00000428056,ENSP00000432083,ENSP00000436679,ENSP00000438483,ENSP00000451828,ENSP00000485010	AKT1,CIITA,EP300,HNRNPUL1,HSPA1A,HSPA1L,HSPA2,HSPA8,JAK1,JUN,KPNA2,MAP2K4,MAPK3,MAPK8,NFKB1,NLRX1,NUP98,NXF1,PIK3R1,PML,RELA,SLC25A6,TRIM25,VDAC1,XPO1
hsa00010	Glycolysis / Gluconeogenesis	14	68	0.0022	ENSP00000205402,ENSP00000216780,ENSP00000229239,ENSP00000253382,ENSP00000261733,ENSP00000280346,ENSP00000307241,ENSP00000316924,ENSP00000319814,ENSP00000359991,ENSP00000362413,ENSP00000369134,ENSP00000370517,ENSP00000402103	ACSS1,ACSS2,ALDH2,DLAT,DLD,GAPDH,HK1,PCK1,PCK2,PDHA1,PDHB,PFKP,PGAM1,PGK1
hsa01522	Endocrine resistance	17	95	0.0022	ENSP00000228872,ENSP00000258149,ENSP00000263025,ENSP00000267163,ENSP00000268712,ENSP00000269305,ENSP00000306245,ENSP00000329357,ENSP00000343925,ENSP00000345571,ENSP00000354558,ENSP00000360266,ENSP00000378974,ENSP00000401303,ENSP00000405330,ENSP00000428056,ENSP00000451828	AKT1,CDKN1B,E2F1,ESR1,ESR2,FOS,JUN,MAPK3,MAPK8,MDM2,MTOR,NCOR1,PIK3R1,RB1,SHC1,SP1,TP53
hsa05162	Measles	21	133	0.0022	ENSP00000217244,ENSP00000226574,ENSP00000228872,ENSP00000262506,ENSP00000264122,ENSP00000264657,ENSP00000265734,ENSP00000266970,ENSP00000269305,ENSP00000343204,ENSP00000353408,ENSP00000364802,ENSP00000364805,ENSP00000365042,ENSP00000367545,ENSP00000378199,ENSP00000384273,ENSP00000426909,ENSP00000428056,ENSP00000432083,ENSP00000451828	AKT1,CBLB,CDK2,CDK6,CDKN1B,CSNK2A1,CSNK2A2,CSNK2B,GNB2L1,HSPA1A,HSPA1L,HSPA2,HSPA8,JAK1,MSN,NFKB1,PIK3R1,RELA,STAT3,TP53,TP73
hsa04714	Thermogenesis	30	228	0.0024	ENSP00000203407,ENSP00000215375,ENSP00000219476,ENSP00000233627,ENSP00000252711,ENSP00000254480,ENSP00000262030,ENSP00000264867,ENSP00000264932,ENSP00000265773,ENSP00000266544,ENSP00000267064,ENSP00000268379,ENSP00000287820,ENSP00000307272,ENSP00000309565,ENSP00000320485,ENSP00000322450,ENSP00000337332,ENSP00000350012,ENSP00000354558,ENSP00000356972,ENSP00000364649,ENSP00000369757,ENSP00000381736…	ACSL3,ARID1A,ATP5A1,ATP5B,ATP5D,CREB1,KDM1A,MTOR,NDUFA10,NDUFA9,NDUFS1,NDUFS2,NDUFS7,NDUFV1,PPARG,PPARGC1A,RPS6,RPTOR,SDHA,SDHB,SIRT6,SMARCA2,SMARCA4,SMARCC1,SMARCC2,SMARCD2,TSC2,UQCRC1,UQCRC2,UQCRH
hsa04210	Apoptosis	21	135	0.0025	ENSP00000226574,ENSP00000248437,ENSP00000250416,ENSP00000259808,ENSP00000263025,ENSP00000269305,ENSP00000278616,ENSP00000301071,ENSP00000301072,ENSP00000306245,ENSP00000327054,ENSP00000355759,ENSP00000357283,ENSP00000360266,ENSP00000361824,ENSP00000363435,ENSP00000378974,ENSP00000384273,ENSP00000428056,ENSP00000431984,ENSP00000451828	AKT1,ATM,CAPN1,FOS,ITPR3,JUN,LMNA,LMNB2,MAPK3,MAPK8,NFKB1,PARP1,PARP2,PIK3R1,RELA,RIPK1,SPTAN1,TP53,TUBA1A,TUBA1C,TUBA4A
hsa04217	Necroptosis	23	155	0.0025	ENSP00000216274,ENSP00000216392,ENSP00000216962,ENSP00000250416,ENSP00000259808,ENSP00000264657,ENSP00000265333,ENSP00000277865,ENSP00000332194,ENSP00000332790,ENSP00000335153,ENSP00000343204,ENSP00000355759,ENSP00000356436,ENSP00000360671,ENSP00000370808,ENSP00000378974,ENSP00000379457,ENSP00000423563,ENSP00000431984,ENSP00000434024,ENSP00000438465,ENSP00000449089	CAPN1,DNM1L,FAF1,GLUD1,H2AFX,H2AFY,HIST2H2AB,HIST2H2AC,HSP90AA1,JAK1,MAPK8,PARP1,PARP2,PGAM5,PLA2G4A,PYGB,PYGL,RIPK1,RIPK3,SLC25A5,SLC25A6,STAT3,VDAC1
hsa04520	Adherens junction	14	71	0.0028	ENSP00000211998,ENSP00000217244,ENSP00000244050,ENSP00000252699,ENSP00000262506,ENSP00000263025,ENSP00000263253,ENSP00000268182,ENSP00000281537,ENSP00000304669,ENSP00000344456,ENSP00000365042,ENSP00000375960,ENSP00000377941	ACTN1,ACTN4,CSNK2A1,CSNK2A2,CSNK2B,CTNNA1,CTNNB1,EP300,IQGAP1,MAPK3,MLLT4,SNAI1,TJP1,VCL
hsa04530	Tight junction	24	167	0.0028	ENSP00000216181,ENSP00000219255,ENSP00000245934,ENSP00000248437,ENSP00000252699,ENSP00000263238,ENSP00000271636,ENSP00000281537,ENSP00000301071,ENSP00000301072,ENSP00000302961,ENSP00000324804,ENSP00000324856,ENSP00000353408,ENSP00000353590,ENSP00000356042,ENSP00000358723,ENSP00000360266,ENSP00000367220,ENSP00000375960,ENSP00000377941,ENSP00000378974,ENSP00000438262,ENSP00000470298	ACTN1,ACTN4,ACTR2,ACTR3,CGN,EZR,HSPA4,JUN,MAPK8,MLLT4,MSN,MYH10,MYH14,MYH9,PARD6A,PPP2R1A,RAP1A,STK11,SYMPK,TJP1,TJP2,TUBA1A,TUBA1C,TUBA4A
hsa04932	Non-alcoholic fatty liver disease (NAFLD)	22	149	0.0032	ENSP00000203407,ENSP00000226574,ENSP00000233627,ENSP00000252711,ENSP00000264932,ENSP00000266544,ENSP00000268379,ENSP00000304895,ENSP00000309565,ENSP00000322450,ENSP00000348069,ENSP00000356972,ENSP00000360266,ENSP00000364649,ENSP00000365016,ENSP00000378974,ENSP00000384273,ENSP00000385523,ENSP00000392709,ENSP00000428056,ENSP00000451828,ENSP00000477707	AKT1,IRS1,IRS2,JUN,MAPK8,NDUFA10,NDUFA9,NDUFS1,NDUFS2,NDUFS7,NDUFV1,NFKB1,NR1H3,PIK3R1,PPARA,RELA,SDHA,SDHB,SREBF1,UQCRC1,UQCRC2,UQCRH
hsa04330	Notch signaling pathway	11	48	0.0036	ENSP00000005340,ENSP00000225916,ENSP00000232424,ENSP00000261531,ENSP00000263253,ENSP00000263754,ENSP00000316054,ENSP00000362649,ENSP00000367714,ENSP00000368169,ENSP00000430432	DVL1,DVL2,DVL3,EP300,HDAC1,HDAC2,HES1,HES5,KAT2A,KAT2B,SNW1
hsa03410	Base excision repair	9	33	0.0037	ENSP00000216714,ENSP00000250416,ENSP00000263681,ENSP00000322570,ENSP00000355759,ENSP00000361170,ENSP00000364126,ENSP00000376611,ENSP00000480186	APEX1,APEX2,MUTYH,PARP1,PARP2,POLD2,POLD3,POLE,TDG
hsa05161	Hepatitis B	21	142	0.0039	ENSP00000226574,ENSP00000228872,ENSP00000263025,ENSP00000263253,ENSP00000264657,ENSP00000265734,ENSP00000266970,ENSP00000267163,ENSP00000269305,ENSP00000301764,ENSP00000306245,ENSP00000343204,ENSP00000345571,ENSP00000360266,ENSP00000378974,ENSP00000384273,ENSP00000387699,ENSP00000410402,ENSP00000428056,ENSP00000451828,ENSP00000479618	AKT1,CDK2,CDK6,CDKN1B,CREB1,DDB1,E2F1,EP300,FOS,JAK1,JUN,MAP2K4,MAPK3,MAPK8,MYC,NFKB1,PIK3R1,RB1,RELA,STAT3,TP53
hsa04612	Antigen processing and presentation	13	66	0.004	ENSP00000216802,ENSP00000247461,ENSP00000293362,ENSP00000302961,ENSP00000320866,ENSP00000324173,ENSP00000335153,ENSP00000364802,ENSP00000364805,ENSP00000378199,ENSP00000387699,ENSP00000432083,ENSP00000485010	CALR,CANX,CIITA,CREB1,HSP90AA1,HSPA1A,HSPA1L,HSPA2,HSPA4,HSPA5,HSPA8,PSME2,PSME3
hsa05225	Hepatocellular carcinoma	23	163	0.004	ENSP00000005340,ENSP00000254480,ENSP00000263025,ENSP00000265734,ENSP00000265773,ENSP00000267064,ENSP00000267163,ENSP00000269305,ENSP00000290765,ENSP00000316054,ENSP00000320485,ENSP00000344456,ENSP00000345571,ENSP00000354558,ENSP00000368169,ENSP00000378307,ENSP00000381607,ENSP00000392617,ENSP00000395654,ENSP00000401303,ENSP00000428056,ENSP00000451828,ENSP00000479618	AKT1,ARID1A,CDK6,CTNNB1,DVL1,DVL2,DVL3,E2F1,GSTP1,GSTT2B,MAPK3,MTOR,MYC,PBRM1,PIK3R1,RB1,SHC1,SMARCA2,SMARCA4,SMARCC1,SMARCC2,SMARCD2,TP53
hsa04915	Estrogen signaling pathway	20	133	0.0041	ENSP00000001008,ENSP00000254066,ENSP00000263025,ENSP00000297494,ENSP00000299767,ENSP00000306245,ENSP00000329357,ENSP00000335153,ENSP00000343925,ENSP00000360266,ENSP00000363435,ENSP00000364802,ENSP00000364805,ENSP00000378199,ENSP00000387699,ENSP00000401303,ENSP00000405330,ENSP00000428056,ENSP00000432083,ENSP00000451828	AKT1,CREB1,ESR1,ESR2,FKBP4,FOS,HSP90AA1,HSP90B1,HSPA1A,HSPA1L,HSPA2,HSPA8,ITPR3,JUN,MAPK3,NOS3,PIK3R1,RARA,SHC1,SP1
hsa00250	Alanine, aspartate and glutamate metabolism	9	35	0.0049	ENSP00000175506,ENSP00000253778,ENSP00000264705,ENSP00000277865,ENSP00000317379,ENSP00000345282,ENSP00000349860,ENSP00000361471,ENSP00000402608	ASNS,ASS1,CAD,CPS1,GFPT1,GFPT2,GLS,GLUD1,GPT2
hsa04722	Neurotrophin signaling pathway	18	116	0.0051	ENSP00000178640,ENSP00000226574,ENSP00000256637,ENSP00000263025,ENSP00000264335,ENSP00000269305,ENSP00000269321,ENSP00000304895,ENSP00000358723,ENSP00000360266,ENSP00000364847,ENSP00000367545,ENSP00000378974,ENSP00000384273,ENSP00000385824,ENSP00000401303,ENSP00000428056,ENSP00000451828	AKT1,ARHGDIA,FOXO3,IRS1,JUN,MAGED1,MAP2K5,MAPK3,MAPK8,NFKB1,PIK3R1,RAP1A,RELA,SHC1,SORT1,TP53,TP73,YWHAE
hsa04917	Prolactin signaling pathway	13	69	0.0052	ENSP00000226574,ENSP00000263025,ENSP00000264657,ENSP00000306245,ENSP00000311010,ENSP00000343925,ENSP00000378974,ENSP00000384273,ENSP00000385824,ENSP00000401303,ENSP00000405330,ENSP00000428056,ENSP00000451828	AKT1,ELF5,ESR1,ESR2,FOS,FOXO3,MAPK3,MAPK8,NFKB1,PIK3R1,RELA,SHC1,STAT3
hsa00970	Aminoacyl-tRNA biosynthesis	10	44	0.0056	ENSP00000234677,ENSP00000244571,ENSP00000256854,ENSP00000261772,ENSP00000325448,ENSP00000347495,ENSP00000355889,ENSP00000358549,ENSP00000373918,ENSP00000472847	AARS,AARS2,GARS,IARS2,KARS,NARS,RARS2,SARS,SARS2,WARS
hsa05130	Pathogenic Escherichia coli infection	11	53	0.0061	ENSP00000217133,ENSP00000248437,ENSP00000264071,ENSP00000301071,ENSP00000301072,ENSP00000318195,ENSP00000320295,ENSP00000344456,ENSP00000356042,ENSP00000369703,ENSP00000456206	CTNNB1,ENSG00000258947,EZR,NCL,TUBA1A,TUBA1C,TUBA4A,TUBB1,TUBB2A,TUBB4A,TUBB8
hsa05134	Legionellosis	11	54	0.0068	ENSP00000226574,ENSP00000331901,ENSP00000339063,ENSP00000351777,ENSP00000364802,ENSP00000364805,ENSP00000373620,ENSP00000378199,ENSP00000384273,ENSP00000431512,ENSP00000432083	EEF1A1,EEF1G,HSF1,HSPA1A,HSPA1L,HSPA2,HSPA8,HSPD1,NFKB1,RELA,VCP
hsa01230	Biosynthesis of amino acids	13	72	0.0069	ENSP00000229239,ENSP00000331897,ENSP00000333667,ENSP00000342502,ENSP00000345282,ENSP00000359991,ENSP00000360268,ENSP00000361471,ENSP00000362413,ENSP00000370517,ENSP00000377532,ENSP00000384949,ENSP00000402608	ALDH18A1,ASS1,CPS1,GAPDH,GPT2,IDH2,PC,PFKP,PGAM1,PGK1,PYCR1,PYCR2,SHMT2
hsa03420	Nucleotide excision repair	10	46	0.007	ENSP00000261245,ENSP00000263681,ENSP00000285021,ENSP00000301764,ENSP00000322570,ENSP00000364270,ENSP00000364589,ENSP00000371321,ENSP00000384109,ENSP00000480186	CUL4A,CUL4B,DDB1,MNAT1,POLD2,POLD3,POLE,RFC1,XPA,XPC
hsa05418	Fluid shear stress and atherosclerosis	19	133	0.008	ENSP00000178640,ENSP00000226574,ENSP00000262971,ENSP00000269305,ENSP00000290765,ENSP00000297494,ENSP00000299767,ENSP00000306245,ENSP00000335153,ENSP00000340874,ENSP00000344456,ENSP00000360266,ENSP00000361471,ENSP00000378974,ENSP00000381607,ENSP00000384273,ENSP00000410402,ENSP00000428056,ENSP00000451828	AKT1,ASS1,CTNNB1,FOS,GSTP1,GSTT2B,HSP90AA1,HSP90B1,JUN,MAP2K4,MAP2K5,MAPK8,MEF2C,NFKB1,NOS3,PIAS4,PIK3R1,RELA,TP53
hsa05212	Pancreatic cancer	13	74	0.0082	ENSP00000226574,ENSP00000263025,ENSP00000264657,ENSP00000265734,ENSP00000267163,ENSP00000269305,ENSP00000343204,ENSP00000345571,ENSP00000354558,ENSP00000378974,ENSP00000384273,ENSP00000428056,ENSP00000451828	AKT1,CDK6,E2F1,JAK1,MAPK3,MAPK8,MTOR,NFKB1,PIK3R1,RB1,RELA,STAT3,TP53
hsa05132	Salmonella infection	14	84	0.0085	ENSP00000216181,ENSP00000226574,ENSP00000263025,ENSP00000281537,ENSP00000306245,ENSP00000327145,ENSP00000348965,ENSP00000353590,ENSP00000358866,ENSP00000360266,ENSP00000378974,ENSP00000384273,ENSP00000420213,ENSP00000470298	DYNC1H1,FLNA,FLNB,FLNC,FOS,JUN,MAPK3,MAPK8,MYH10,MYH14,MYH9,NFKB1,RELA,TJP1
hsa04022	cGMP-PKG signaling pathway	21	160	0.0116	ENSP00000225174,ENSP00000263025,ENSP00000265333,ENSP00000266376,ENSP00000297494,ENSP00000304895,ENSP00000326031,ENSP00000340874,ENSP00000341779,ENSP00000347507,ENSP00000360671,ENSP00000361202,ENSP00000363435,ENSP00000365016,ENSP00000370808,ENSP00000378769,ENSP00000387699,ENSP00000440045,ENSP00000445306,ENSP00000451828,ENSP00000460070	AKT1,ATP1A1,ATP2A2,CACNA1C,CREB1,GTF2I,IRS1,IRS2,IRS4,ITPR3,MAPK3,MEF2C,MYH7,NOS3,PPIF,PPP1CA,PPP1CB,PPP1CC,SLC25A5,SLC25A6,VDAC1
hsa05167	Kaposi's sarcoma-associated herpesvirus infection	23	183	0.0122	ENSP00000226574,ENSP00000263025,ENSP00000263253,ENSP00000264657,ENSP00000265734,ENSP00000266458,ENSP00000267163,ENSP00000269305,ENSP00000306245,ENSP00000343204,ENSP00000344456,ENSP00000345571,ENSP00000354558,ENSP00000360266,ENSP00000363435,ENSP00000378974,ENSP00000384273,ENSP00000387699,ENSP00000410402,ENSP00000428056,ENSP00000437955,ENSP00000451828,ENSP00000479618	AKT1,CDK6,CREB1,CTNNB1,E2F1,EP300,FOS,GABARAPL1,HIF1A,ITPR3,JAK1,JUN,MAP2K4,MAPK3,MAPK8,MTOR,MYC,NFKB1,PIK3R1,RB1,RELA,STAT3,TP53
hsa03450	Non-homologous end-joining	5	13	0.0132	ENSP00000313420,ENSP00000325863,ENSP00000352257,ENSP00000368100,ENSP00000375978	MRE11A,PRKDC,RAD50,XRCC5,XRCC6
hsa01524	Platinum drug resistance	12	70	0.0133	ENSP00000233146,ENSP00000234420,ENSP00000258149,ENSP00000263025,ENSP00000269305,ENSP00000278616,ENSP00000290765,ENSP00000361310,ENSP00000364270,ENSP00000381607,ENSP00000428056,ENSP00000451828	AKT1,ATM,GSTP1,GSTT2B,MAPK3,MDM2,MSH2,MSH6,PIK3R1,POLH,TP53,XPA
hsa03050	Proteasome	9	43	0.0133	ENSP00000216802,ENSP00000293362,ENSP00000309474,ENSP00000310129,ENSP00000310572,ENSP00000348442,ENSP00000391211,ENSP00000401802,ENSP00000481029	PSMC2,PSMC3,PSMC5,PSMC6,PSMD1,PSMD12,PSMD2,PSME2,PSME3
hsa00220	Arginine biosynthesis	6	20	0.0139	ENSP00000277865,ENSP00000297494,ENSP00000317379,ENSP00000345282,ENSP00000361471,ENSP00000402608	ASS1,CPS1,GLS,GLUD1,GPT2,NOS3
hsa00670	One carbon pool by folate	6	20	0.0139	ENSP00000236959,ENSP00000258494,ENSP00000273450,ENSP00000333667,ENSP00000371253,ENSP00000478253	ALDH1L1,ALDH1L2,ATIC,GART,MTHFD1L,SHMT2
hsa03030	DNA replication	8	36	0.0152	ENSP00000216122,ENSP00000262105,ENSP00000263681,ENSP00000264156,ENSP00000322570,ENSP00000368349,ENSP00000371321,ENSP00000480186	MCM4,MCM5,MCM6,POLA1,POLD2,POLD3,POLE,RFC1
hsa05222	Small cell lung cancer	14	92	0.0157	ENSP00000226574,ENSP00000228872,ENSP00000265734,ENSP00000266970,ENSP00000267163,ENSP00000269305,ENSP00000274255,ENSP00000324532,ENSP00000345571,ENSP00000351490,ENSP00000384273,ENSP00000428056,ENSP00000451828,ENSP00000479618	AKT1,CDK2,CDK6,CDKN1B,E2F1,LAMA3,MAX,MYC,NFKB1,PIK3R1,RB1,RELA,SKP2,TP53
hsa04914	Progesterone-mediated oocyte maturation	14	94	0.0181	ENSP00000216911,ENSP00000256442,ENSP00000263025,ENSP00000266970,ENSP00000335153,ENSP00000339109,ENSP00000378350,ENSP00000378529,ENSP00000378699,ENSP00000378974,ENSP00000394394,ENSP00000428056,ENSP00000434614,ENSP00000451828	AKT1,ANAPC1,ANAPC7,AURKA,CCNB1,CDC23,CDC27,CDK1,CDK2,FZR1,HSP90AA1,MAPK3,MAPK8,PIK3R1
hsa04930	Type II diabetes mellitus	9	46	0.0181	ENSP00000263025,ENSP00000266376,ENSP00000304895,ENSP00000354558,ENSP00000361202,ENSP00000365016,ENSP00000378974,ENSP00000402103,ENSP00000428056	CACNA1C,HK1,IRS1,IRS2,IRS4,MAPK3,MAPK8,MTOR,PIK3R1
hsa05221	Acute myeloid leukemia	11	66	0.0209	ENSP00000226574,ENSP00000254066,ENSP00000254657,ENSP00000263025,ENSP00000264657,ENSP00000268058,ENSP00000354558,ENSP00000384273,ENSP00000428056,ENSP00000451828,ENSP00000479618	AKT1,MAPK3,MTOR,MYC,NFKB1,PER2,PIK3R1,PML,RARA,RELA,STAT3
hsa05205	Proteoglycans in cancer	23	195	0.0211	ENSP00000258149,ENSP00000263025,ENSP00000264033,ENSP00000264657,ENSP00000268182,ENSP00000269305,ENSP00000326031,ENSP00000327145,ENSP00000341779,ENSP00000344456,ENSP00000353408,ENSP00000354558,ENSP00000356042,ENSP00000358866,ENSP00000363435,ENSP00000369757,ENSP00000378769,ENSP00000405330,ENSP00000420213,ENSP00000428056,ENSP00000437955,ENSP00000451828,ENSP00000479618	AKT1,CBL,CTNNB1,ESR1,EZR,FLNA,FLNB,FLNC,HIF1A,IQGAP1,ITPR3,MAPK3,MDM2,MSN,MTOR,MYC,PIK3R1,PPP1CA,PPP1CB,PPP1CC,RPS6,STAT3,TP53
hsa04540	Gap junction	13	87	0.0228	ENSP00000178640,ENSP00000217133,ENSP00000248437,ENSP00000263025,ENSP00000264071,ENSP00000281537,ENSP00000301071,ENSP00000301072,ENSP00000320295,ENSP00000363435,ENSP00000369703,ENSP00000378699,ENSP00000456206	CDK1,ENSG00000258947,ITPR3,MAP2K5,MAPK3,TJP1,TUBA1A,TUBA1C,TUBA4A,TUBB1,TUBB2A,TUBB4A,TUBB8
hsa04010	MAPK signaling pathway	31	293	0.0239	ENSP00000178640,ENSP00000226574,ENSP00000252818,ENSP00000263025,ENSP00000264664,ENSP00000264674,ENSP00000266376,ENSP00000269305,ENSP00000306245,ENSP00000327145,ENSP00000340820,ENSP00000340874,ENSP00000350681,ENSP00000351015,ENSP00000351490,ENSP00000356436,ENSP00000358723,ENSP00000358866,ENSP00000360266,ENSP00000361892,ENSP00000364802,ENSP00000364805,ENSP00000378199,ENSP00000378974,ENSP00000384273…	AKT1,ARRB2,CACNA1C,ELK4,FGF10,FLNA,FLNB,FLNC,FOS,HSPA1A,HSPA1L,HSPA2,HSPA8,JUN,JUND,MAP2K4,MAP2K5,MAPK3,MAPK8,MAPT,MAX,MECOM,MEF2C,MYC,NF1,NFKB1,PLA2G4A,RAP1A,RELA,STK4,TP53
hsa05211	Renal cell carcinoma	11	68	0.0242	ENSP00000250457,ENSP00000256474,ENSP00000263025,ENSP00000263253,ENSP00000263734,ENSP00000355518,ENSP00000358723,ENSP00000360266,ENSP00000428056,ENSP00000437955,ENSP00000451828	AKT1,EGLN3,EP300,EPAS1,FH,HIF1A,JUN,MAPK3,PIK3R1,RAP1A,VHL
hsa04934	Cushing's syndrome	19	153	0.0246	ENSP00000005340,ENSP00000228872,ENSP00000242057,ENSP00000263025,ENSP00000265734,ENSP00000266376,ENSP00000266970,ENSP00000267163,ENSP00000316054,ENSP00000328511,ENSP00000329357,ENSP00000344456,ENSP00000345571,ENSP00000355518,ENSP00000358723,ENSP00000363435,ENSP00000368169,ENSP00000387699,ENSP00000436786	AHR,CACNA1C,CDK2,CDK6,CDKN1B,CREB1,CTNNB1,DVL1,DVL2,DVL3,E2F1,FH,ITPR3,KCNA4,KMT2A,MAPK3,RAP1A,RB1,SP1
hsa05012	Parkinson's disease	18	142	0.0246	ENSP00000203407,ENSP00000215375,ENSP00000225174,ENSP00000233627,ENSP00000252711,ENSP00000262030,ENSP00000264932,ENSP00000265333,ENSP00000266544,ENSP00000268379,ENSP00000309565,ENSP00000322450,ENSP00000356972,ENSP00000360671,ENSP00000364649,ENSP00000370808,ENSP00000381736,ENSP00000392709	ATP5A1,ATP5B,ATP5D,NDUFA10,NDUFA9,NDUFS1,NDUFS2,NDUFS7,NDUFV1,PPIF,SDHA,SDHB,SLC25A5,SLC25A6,UQCRC1,UQCRC2,UQCRH,VDAC1
hsa05034	Alcoholism	18	142	0.0246	ENSP00000263025,ENSP00000264606,ENSP00000302967,ENSP00000326031,ENSP00000332194,ENSP00000332790,ENSP00000334061,ENSP00000341779,ENSP00000358151,ENSP00000362649,ENSP00000366618,ENSP00000378769,ENSP00000387699,ENSP00000401303,ENSP00000423563,ENSP00000430432,ENSP00000434024,ENSP00000476136	CREB1,H2AFX,H2AFY,HDAC1,HDAC2,HDAC3,HDAC4,HDAC6,HIST1H2BJ,HIST1H2BL,HIST2H2AB,HIST2H2AC,HIST2H2BE,MAPK3,PPP1CA,PPP1CB,PPP1CC,SHC1
hsa04310	Wnt signaling pathway	18	143	0.0255	ENSP00000005340,ENSP00000217244,ENSP00000262506,ENSP00000263253,ENSP00000269305,ENSP00000301691,ENSP00000316054,ENSP00000318297,ENSP00000344456,ENSP00000359206,ENSP00000360266,ENSP00000365042,ENSP00000368169,ENSP00000378974,ENSP00000382863,ENSP00000405574,ENSP00000410715,ENSP00000479618	BTRC,CHD8,CSNK2A1,CSNK2A2,CSNK2B,CTNNB1,DVL1,DVL2,DVL3,EP300,JUN,MAPK8,MYC,RUVBL1,SFRP4,SOST,TBL1XR1,TP53
hsa04659	Th17 cell differentiation	14	102	0.03	ENSP00000226574,ENSP00000242057,ENSP00000254066,ENSP00000263025,ENSP00000264657,ENSP00000306245,ENSP00000335153,ENSP00000343204,ENSP00000354558,ENSP00000360266,ENSP00000365380,ENSP00000378974,ENSP00000384273,ENSP00000437955	AHR,FOS,FOXP3,HIF1A,HSP90AA1,JAK1,JUN,MAPK3,MAPK8,MTOR,NFKB1,RARA,RELA,STAT3
hsa05226	Gastric cancer	18	147	0.0318	ENSP00000005340,ENSP00000228872,ENSP00000263025,ENSP00000264664,ENSP00000266970,ENSP00000267163,ENSP00000269305,ENSP00000304669,ENSP00000316054,ENSP00000344456,ENSP00000345571,ENSP00000346158,ENSP00000354558,ENSP00000368169,ENSP00000401303,ENSP00000428056,ENSP00000451828,ENSP00000479618	AKT1,CDK2,CDKN1B,CTNNA1,CTNNB1,DVL1,DVL2,DVL3,E2F1,FGF10,MAPK3,MTOR,MYC,PIK3R1,RB1,REG4,SHC1,TP53
hsa04012	ErbB signaling pathway	12	83	0.0343	ENSP00000228872,ENSP00000263025,ENSP00000264033,ENSP00000264122,ENSP00000354558,ENSP00000360266,ENSP00000378974,ENSP00000401303,ENSP00000410402,ENSP00000428056,ENSP00000451828,ENSP00000479618	AKT1,CBL,CBLB,CDKN1B,JUN,MAP2K4,MAPK3,MAPK8,MTOR,MYC,PIK3R1,SHC1
hsa05210	Colorectal cancer	12	85	0.0397	ENSP00000233146,ENSP00000234420,ENSP00000263025,ENSP00000269305,ENSP00000306245,ENSP00000344456,ENSP00000354558,ENSP00000360266,ENSP00000378974,ENSP00000428056,ENSP00000451828,ENSP00000479618	AKT1,CTNNB1,FOS,JUN,MAPK3,MAPK8,MSH2,MSH6,MTOR,MYC,PIK3R1,TP53
hsa04668	TNF signaling pathway	14	108	0.0437	ENSP00000216274,ENSP00000226574,ENSP00000259808,ENSP00000263025,ENSP00000306245,ENSP00000360266,ENSP00000378974,ENSP00000384273,ENSP00000387699,ENSP00000410402,ENSP00000428056,ENSP00000438465,ENSP00000449089,ENSP00000451828	AKT1,CREB1,DNM1L,FOS,JUN,MAP2K4,MAPK3,MAPK8,NFKB1,PGAM5,PIK3R1,RELA,RIPK1,RIPK3
hsa05223	Non-small cell lung cancer	10	66	0.0444	ENSP00000263025,ENSP00000264657,ENSP00000265734,ENSP00000267163,ENSP00000269305,ENSP00000345571,ENSP00000361892,ENSP00000385824,ENSP00000428056,ENSP00000451828	AKT1,CDK6,E2F1,FOXO3,MAPK3,PIK3R1,RB1,STAT3,STK4,TP53
hsa05160	Hepatitis C	16	131	0.0447	ENSP00000220849,ENSP00000226574,ENSP00000249636,ENSP00000259808,ENSP00000263025,ENSP00000264657,ENSP00000269305,ENSP00000293362,ENSP00000324804,ENSP00000343204,ENSP00000378974,ENSP00000384273,ENSP00000385523,ENSP00000428056,ENSP00000451828,ENSP00000477707	AKT1,EIF3E,JAK1,MAPK3,MAPK8,NFKB1,NR1H3,PIAS1,PIK3R1,PPARA,PPP2R1A,PSME3,RELA,RIPK1,STAT3,TP53
hsa05145	Toxoplasmosis	14	109	0.0452	ENSP00000225174,ENSP00000226574,ENSP00000263025,ENSP00000264657,ENSP00000324532,ENSP00000343204,ENSP00000364802,ENSP00000364805,ENSP00000378199,ENSP00000378974,ENSP00000384273,ENSP00000432083,ENSP00000451828,ENSP00000485010	AKT1,CIITA,HSPA1A,HSPA1L,HSPA2,HSPA8,JAK1,LAMA3,MAPK3,MAPK8,NFKB1,PPIF,RELA,STAT3
